# Supplementary material for: Main Effect QTL with Dominance Determines Heterosis for Dynamic Plant Height in Upland Cotton
Source: Oxford University Press journal article supplement (doi:10.1534/g3.116.034355), 2016-10-01
Supplement: 034355_figures1.pdf [file 034355_figures1.pdf]

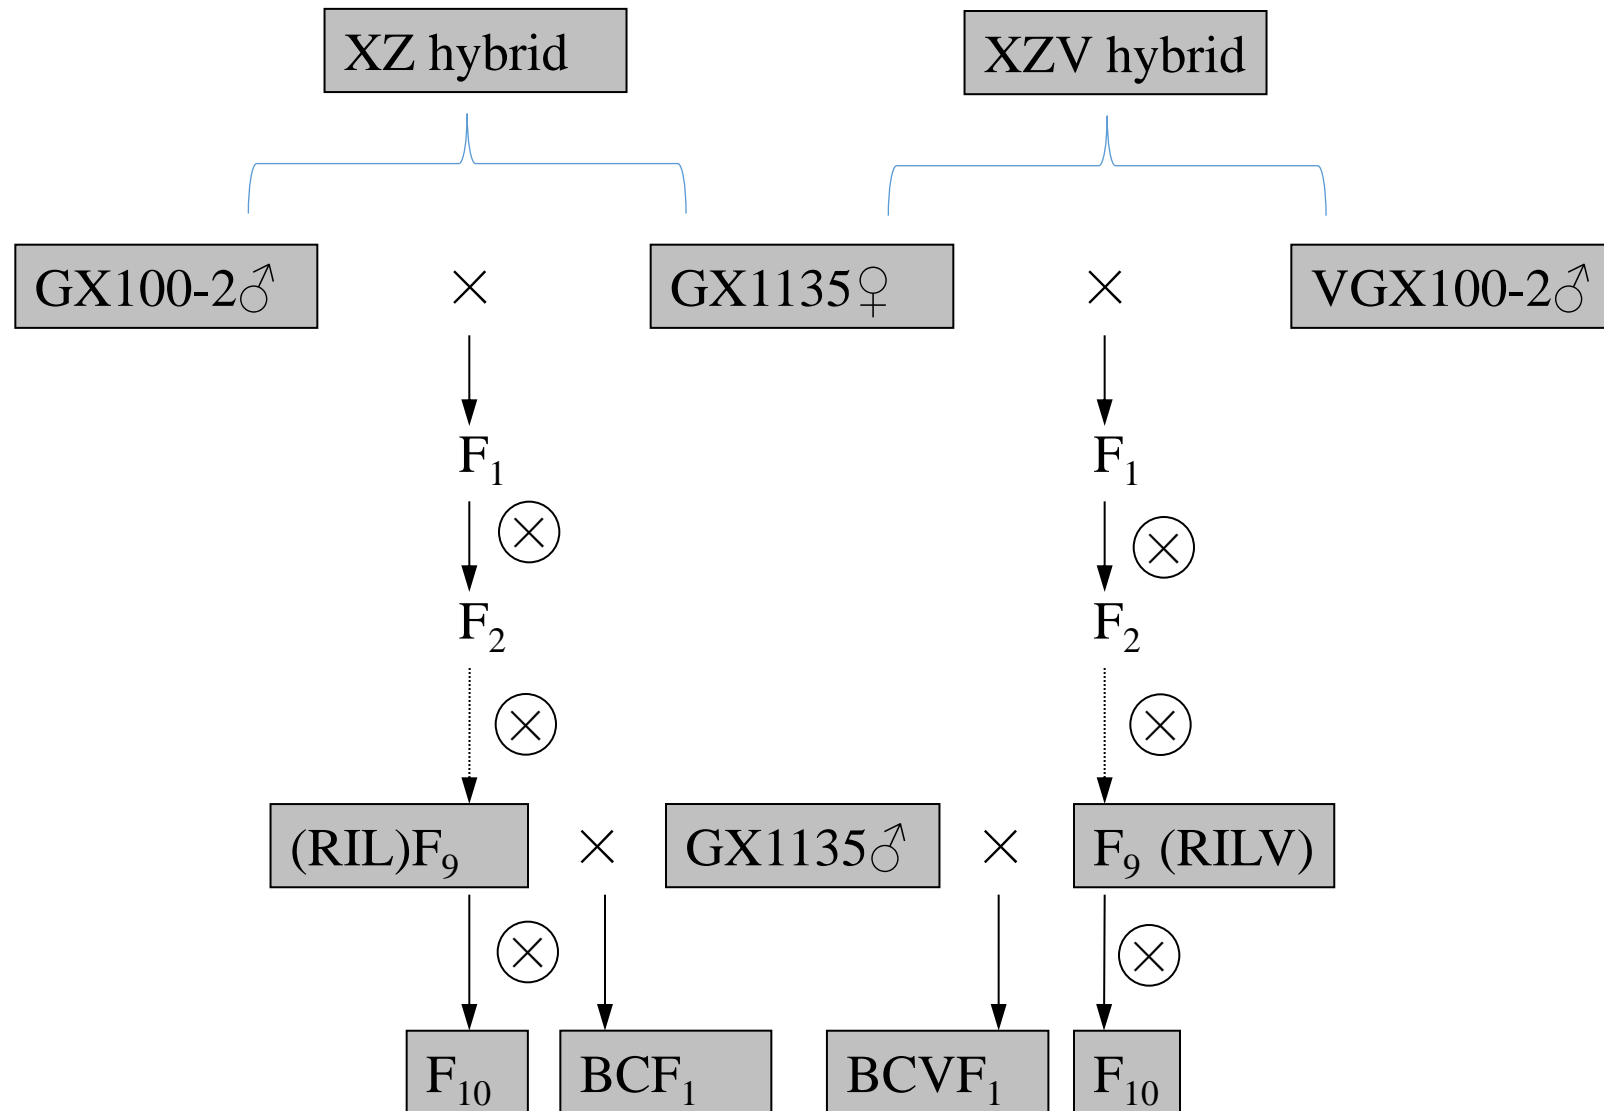

**Figure S1 Diagram of genetic populations construction**
