# Supplementary material for: Main Effect QTL with Dominance Determines Heterosis for Dynamic Plant Height in Upland Cotton
Source: Oxford University Press journal article supplement (doi:10.1534/g3.116.034355), 2016-10-01
Supplement: 034355_figures2.pdf [file 034355_figures2.pdf]

### Chr01 XZ

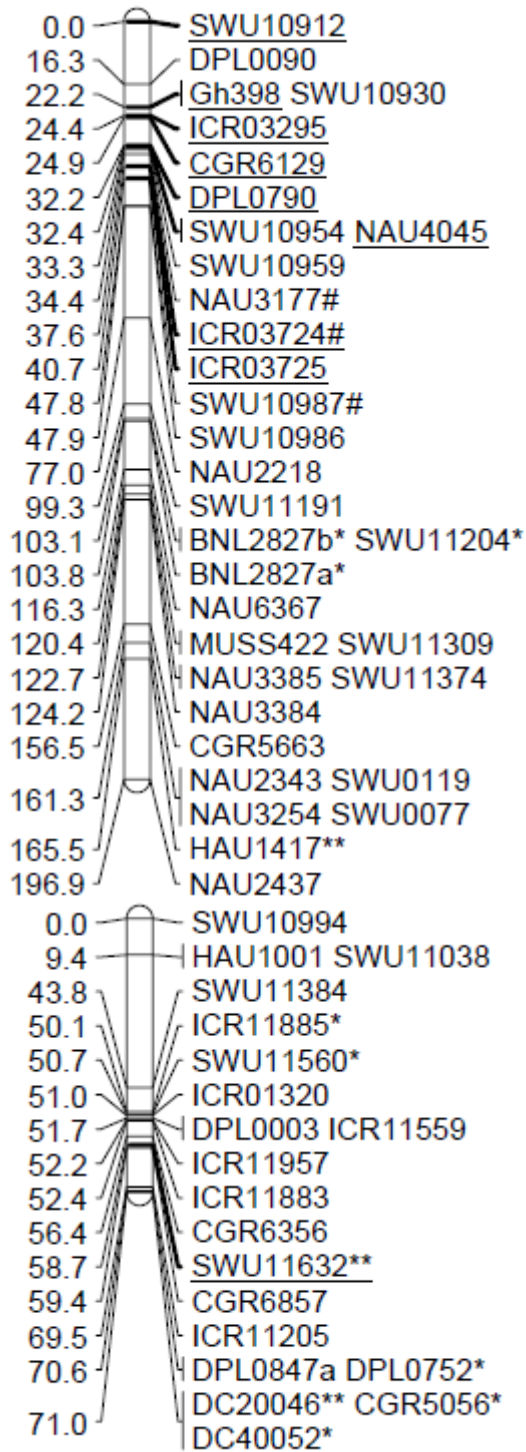

### Chr01 XZV

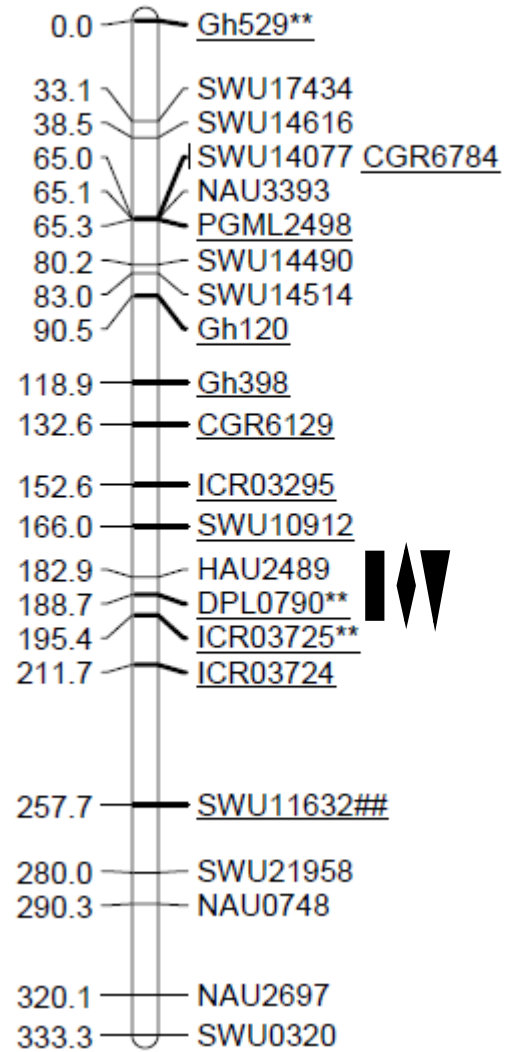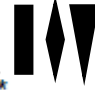

### Chr2 xZ

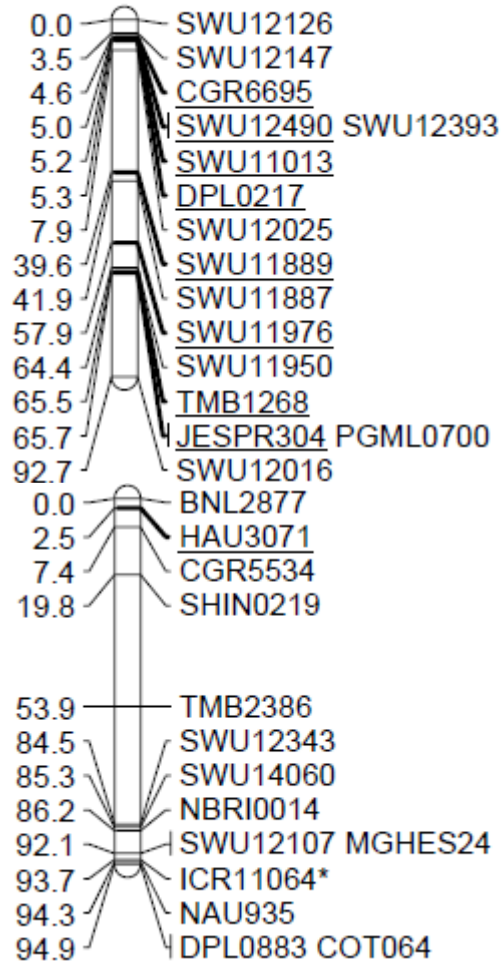

### Chr02 xZV

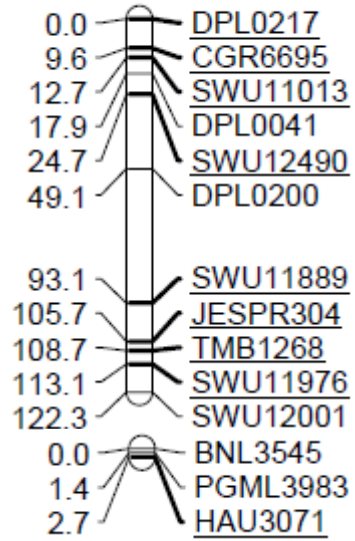

### Chr3 XZ

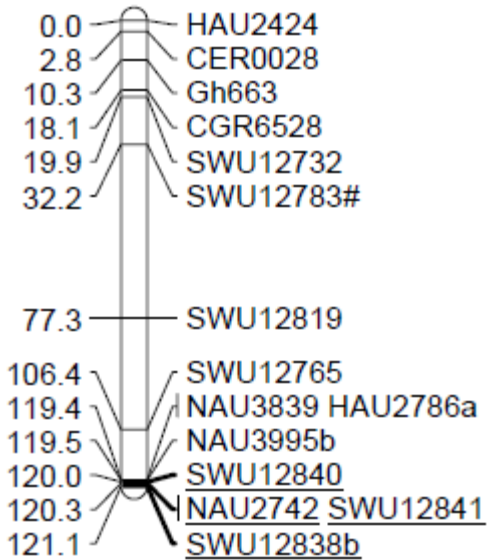

### Chr03 XZV

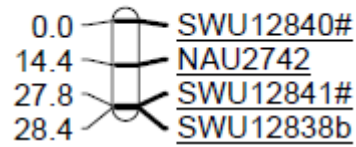

### Chr4 XZ

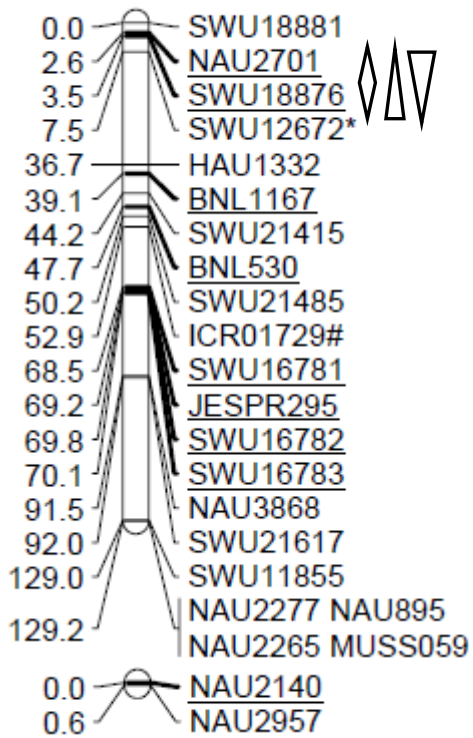

### Chr04 XZV

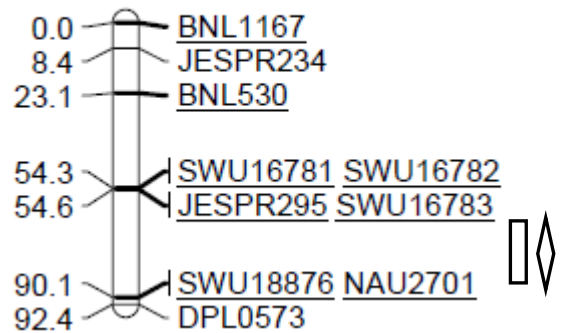

### Chr5 xZ

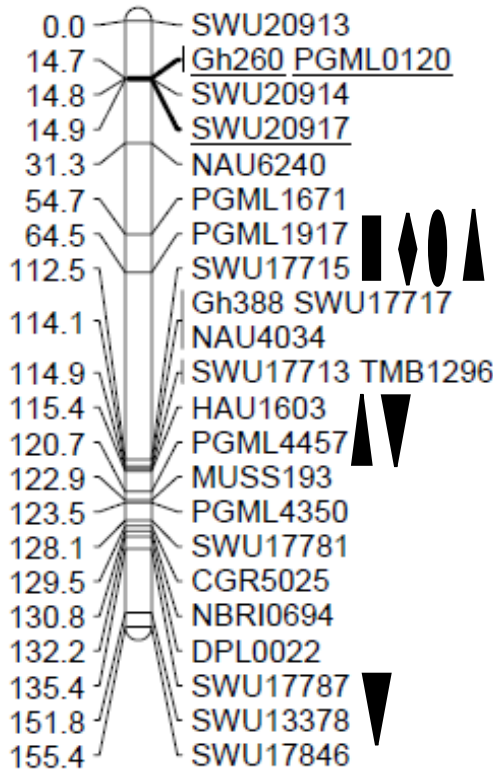

### Chr05 xZV

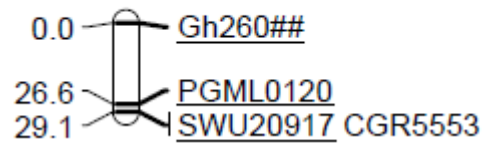

### Chr6 xZ

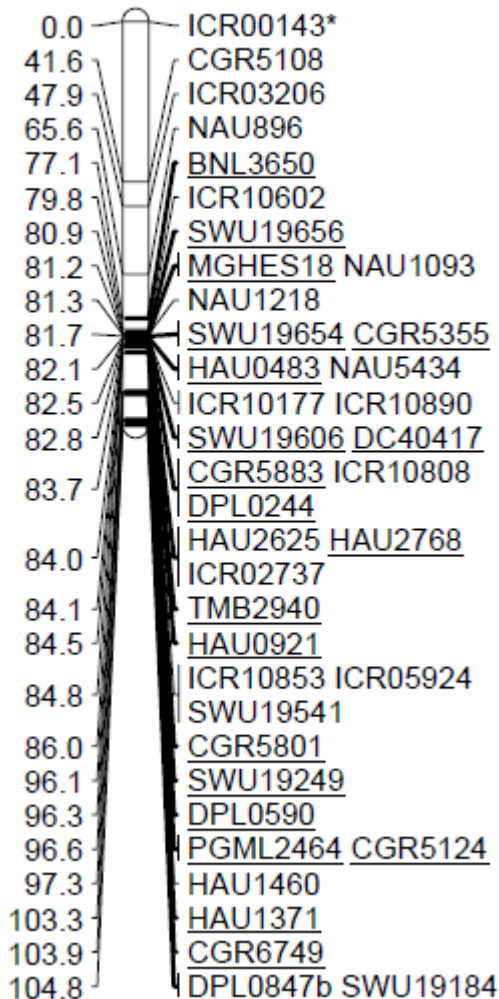

### Chr06 xZV

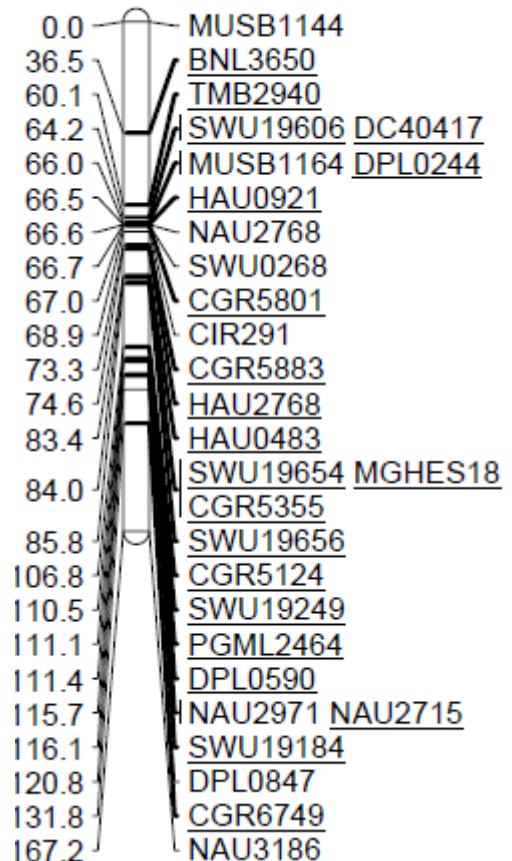

### Chr7 XZ

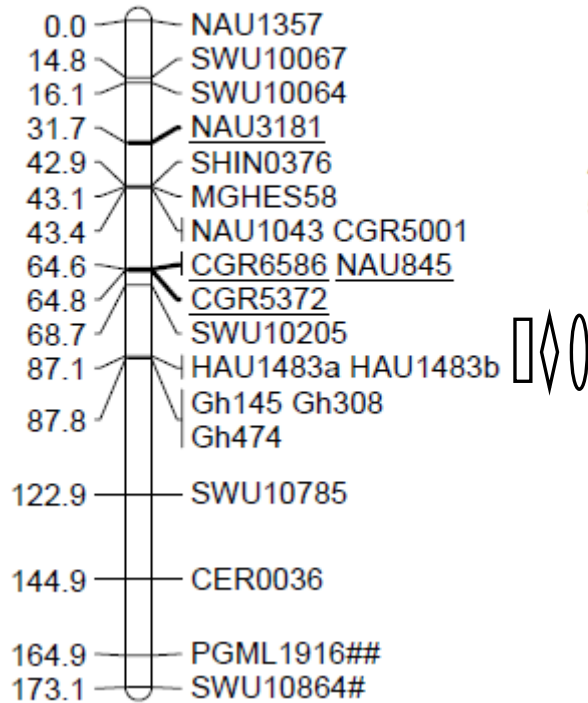

### Chr07 XZV

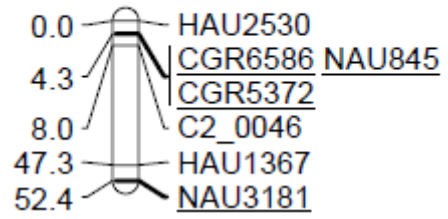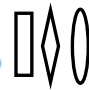

### Chr8 XZ

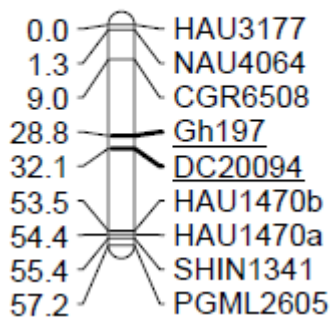

### Chr08 XZV

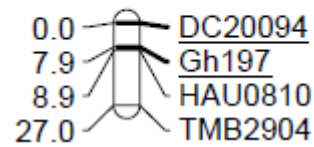

### Chr9 XZ

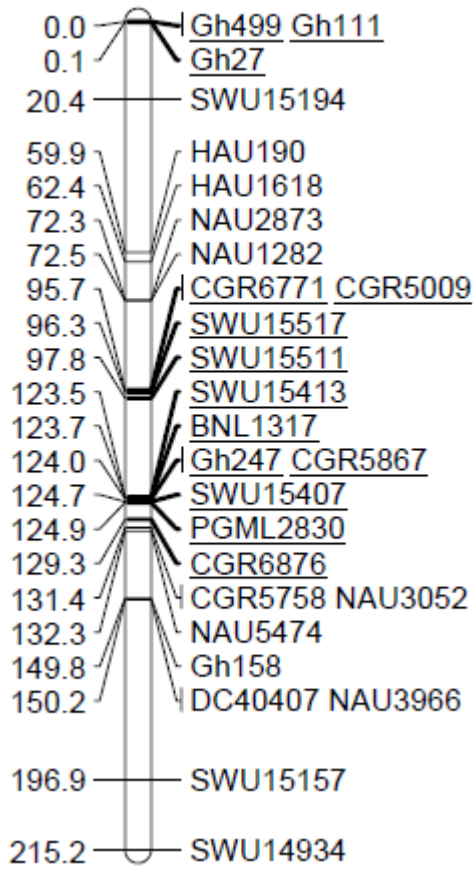

### Chr09 xzV

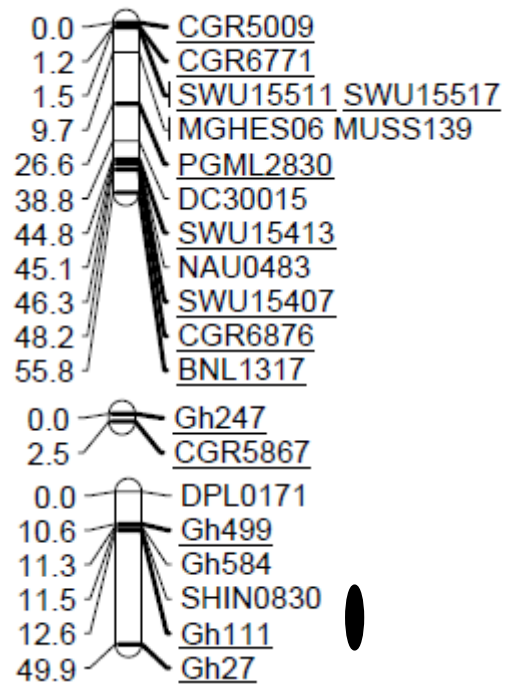

### Chr10 XZ

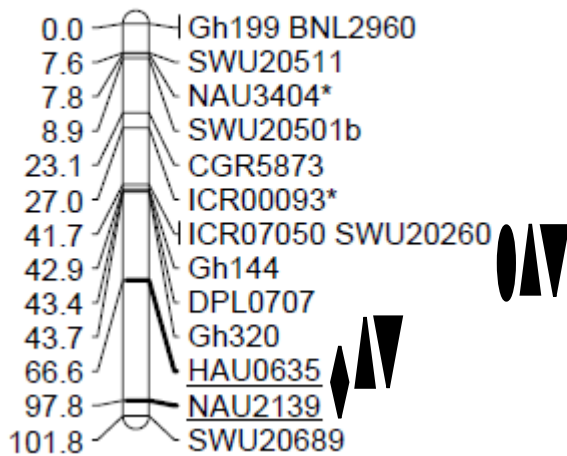

### Chr10 xzV

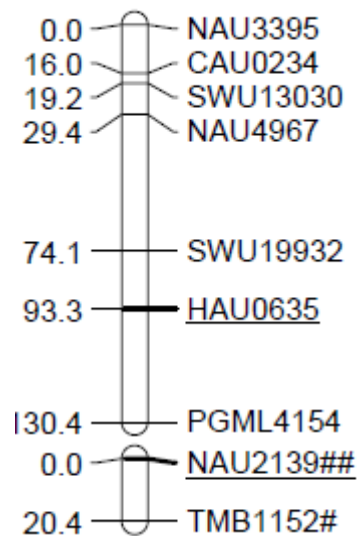

### Chr11 XZ

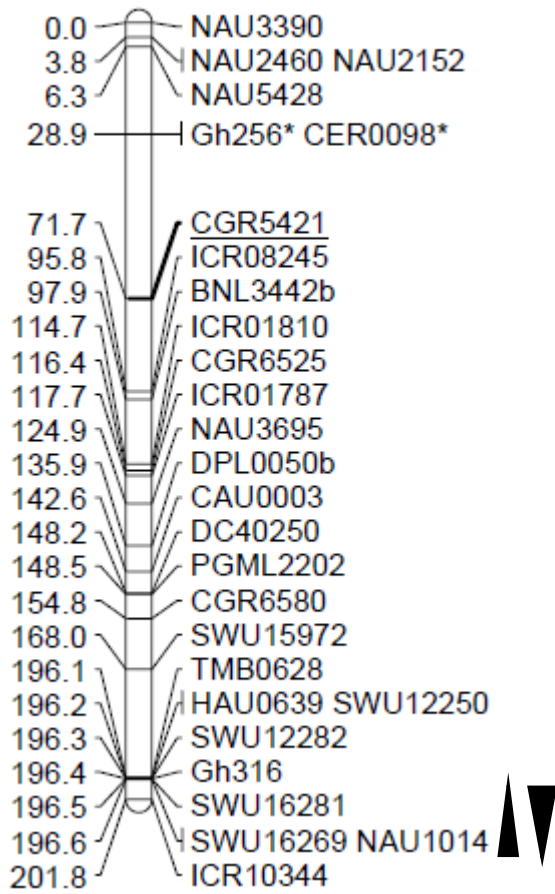

### Chr11 XZV

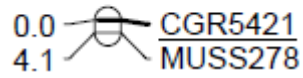

### Chr12 XZ

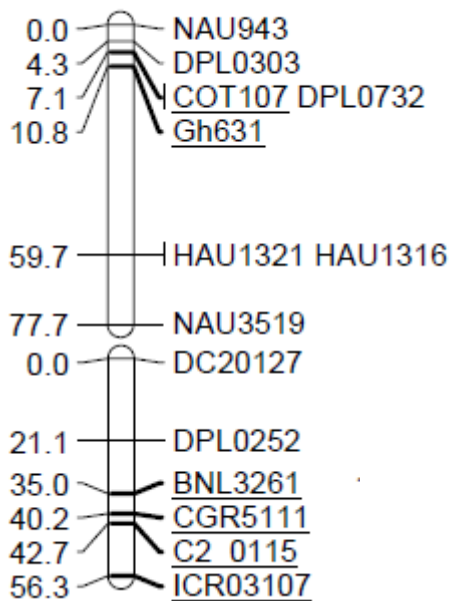

### Chr12 XZV

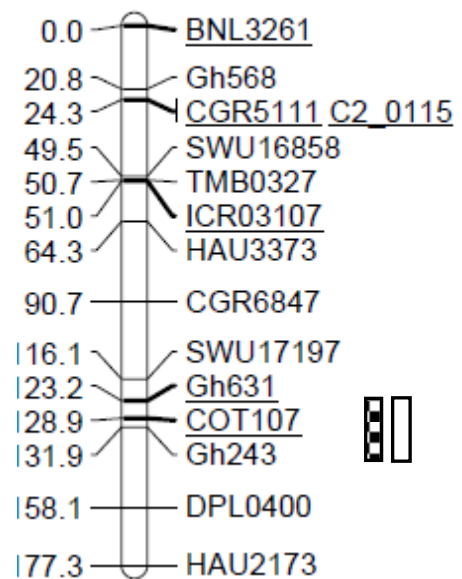

### Chr13 XZ

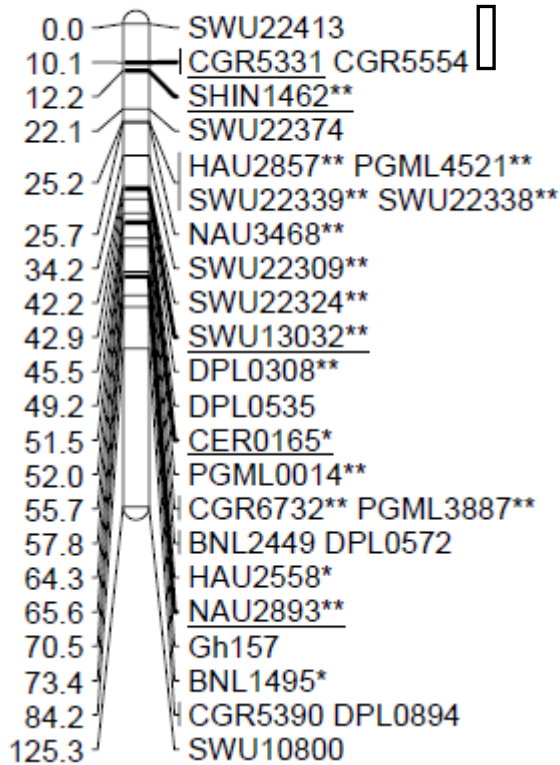

### Chr13 XZV

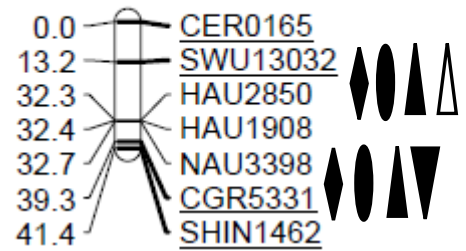

### Chr14 XZ

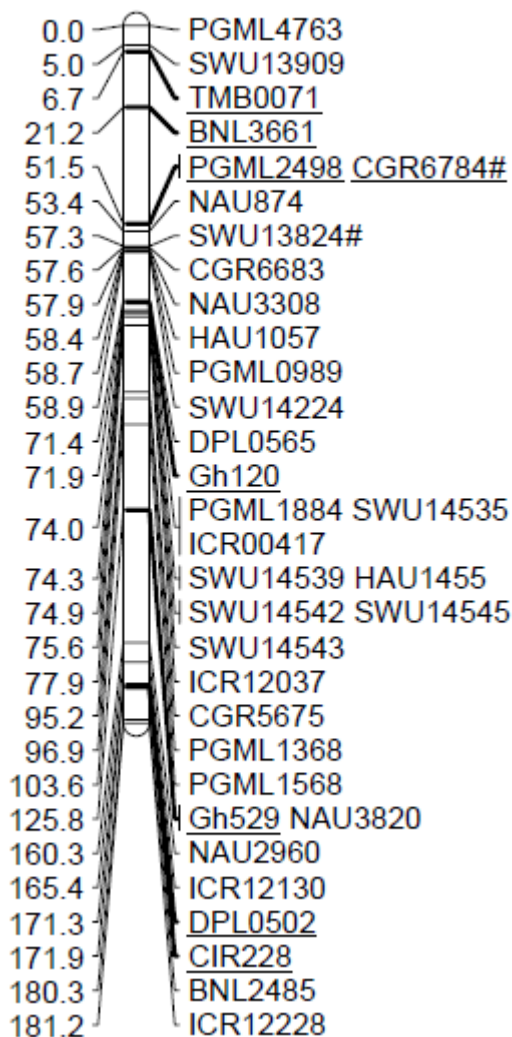

### Chr14 XZV

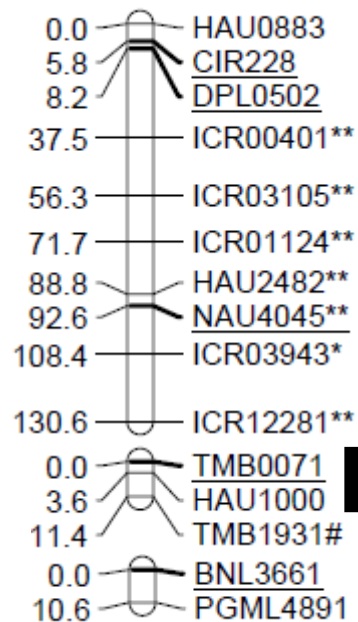



### Chr15 XZ

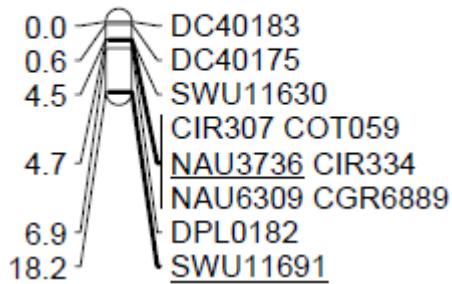

### Chr15 xzV

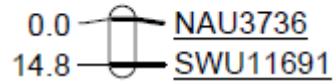

### Chr16 XZ

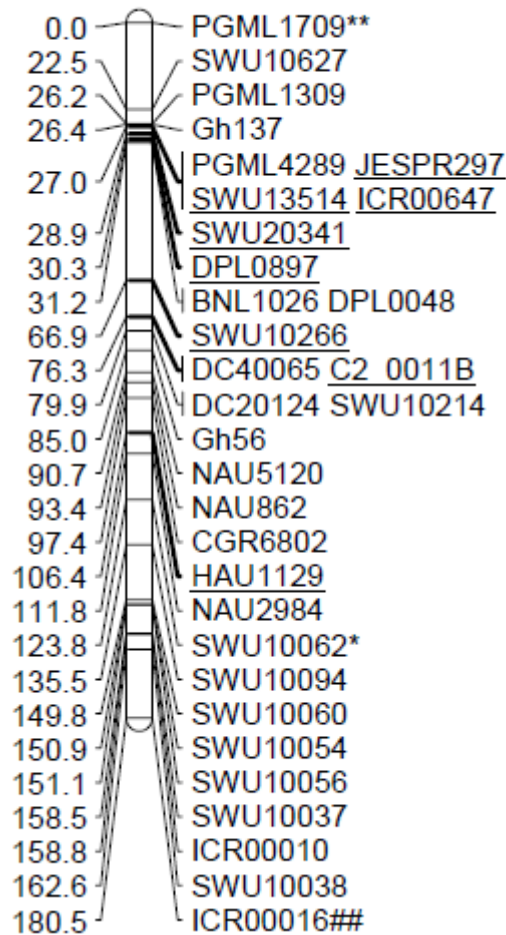

### Chr16 XZV

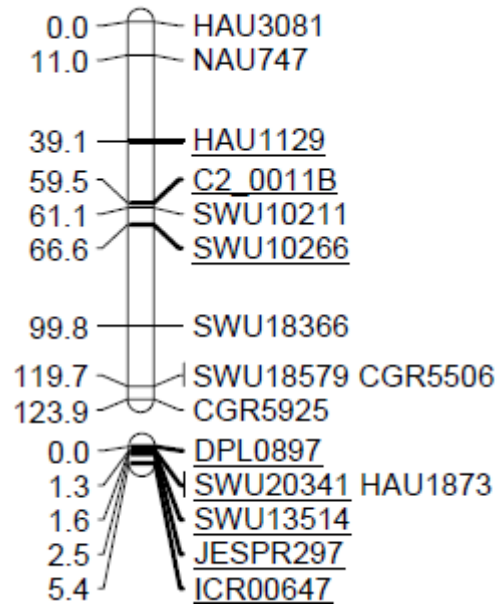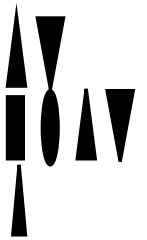

### Chr17 XZ

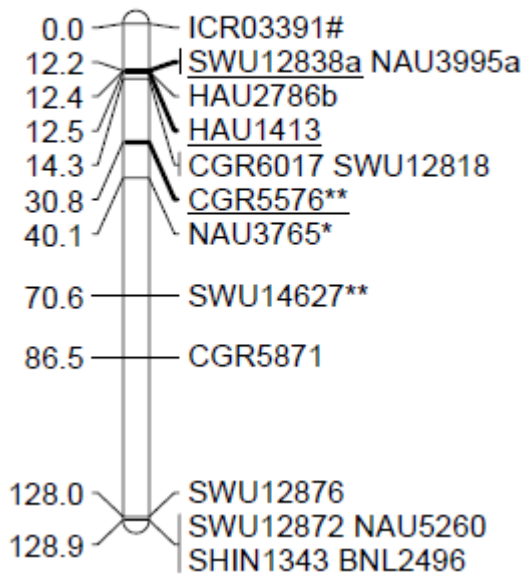

### Chr17 XZV

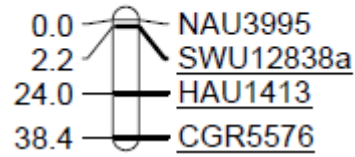

### Chr18 XZ

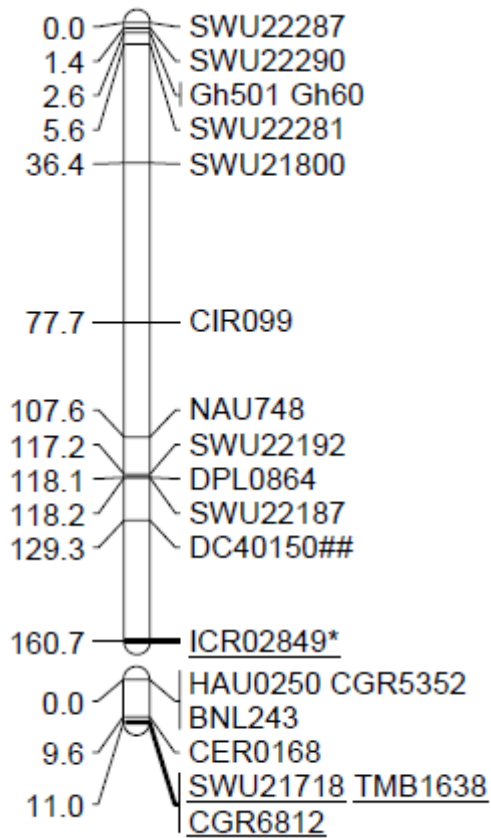

### Chr18 XZV

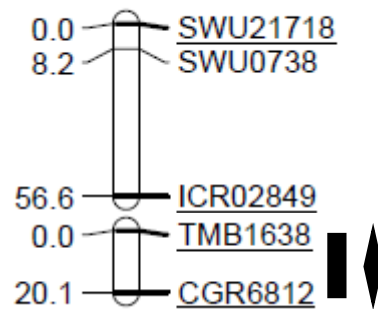

### Chr19 XZ

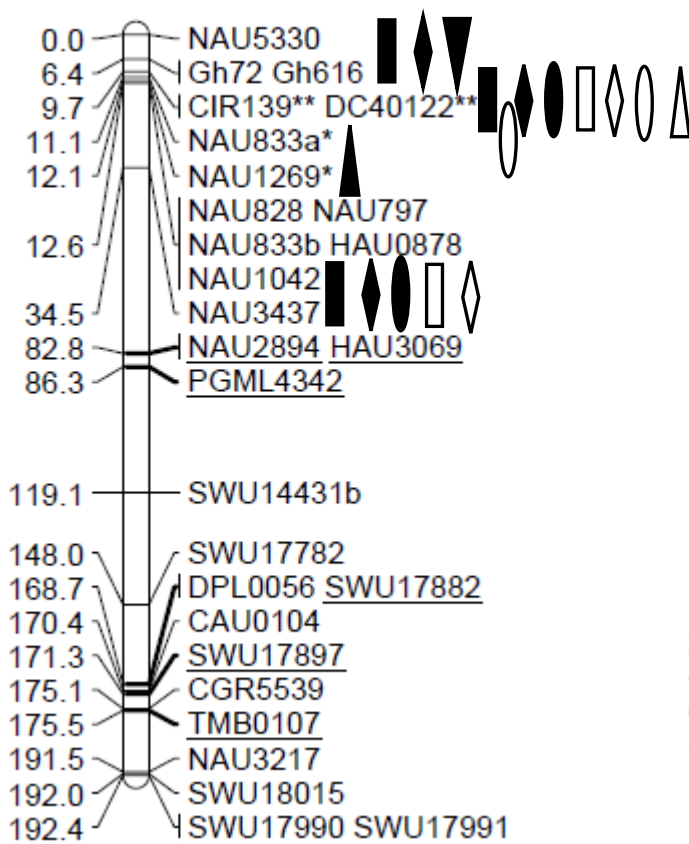

### Chr19 XZV

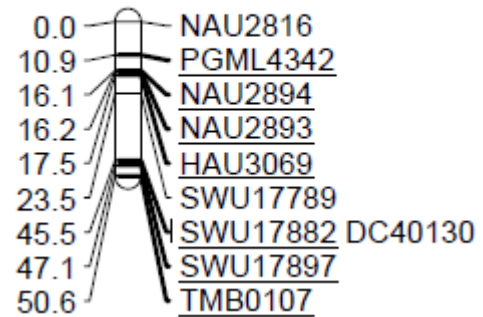

### Chr20 XZ

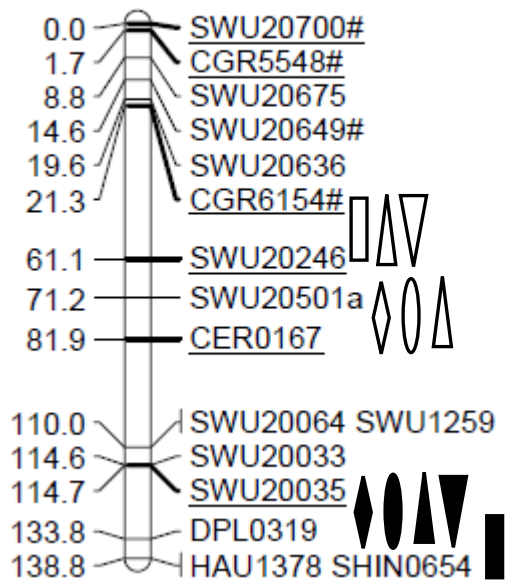

### Chr20 XZV

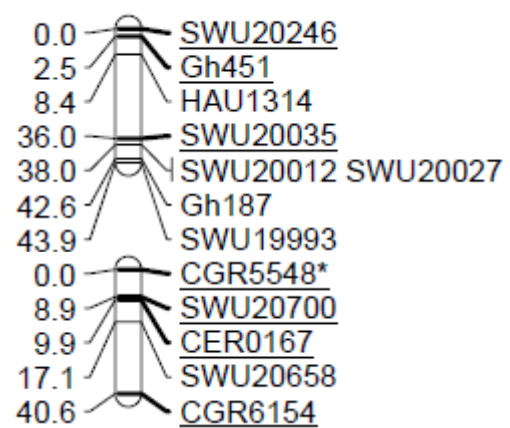

### Chr21 XZ

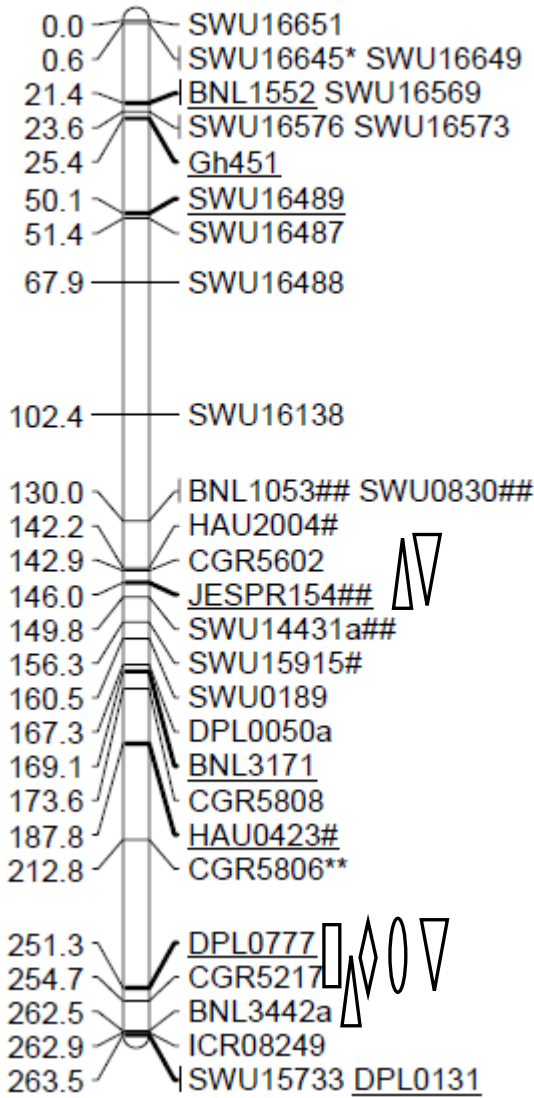

### Chr21 XZV

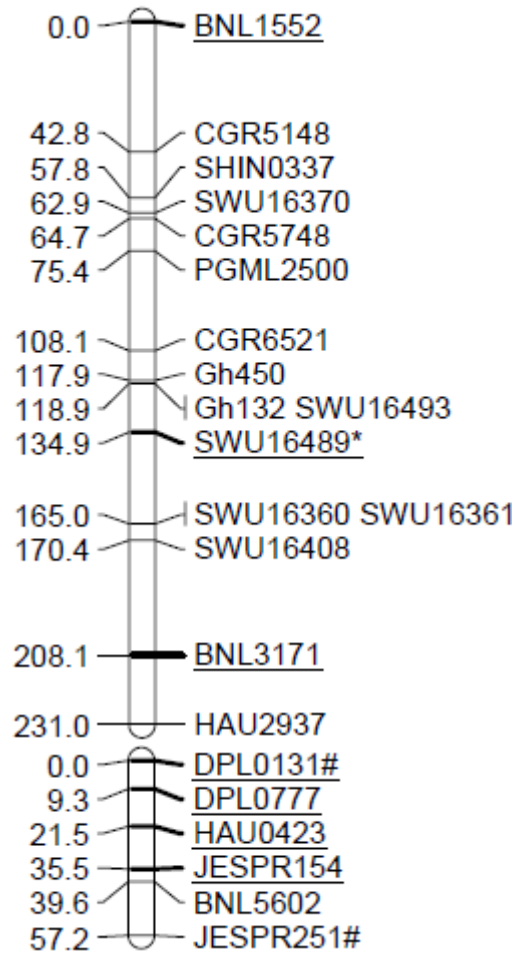

### Chr22 XZ

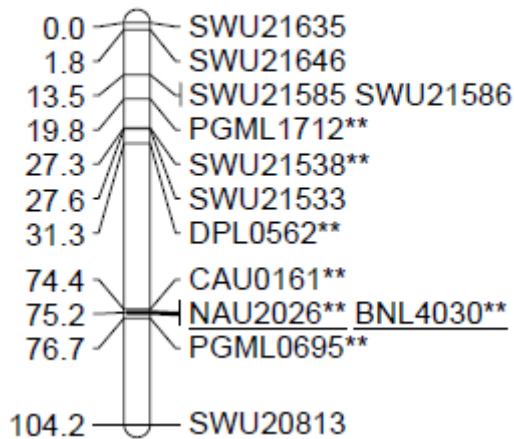

### Chr22 XZV

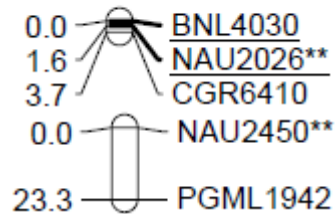

### Chr23 xz

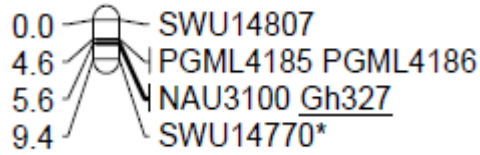

### Chr23 xzV

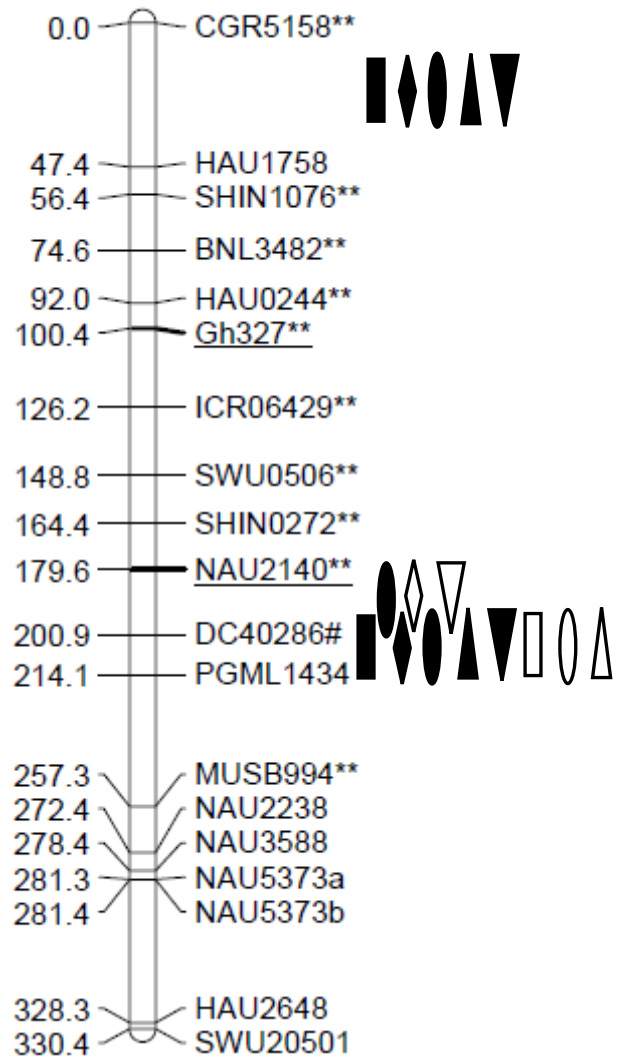

### Chr24 xz

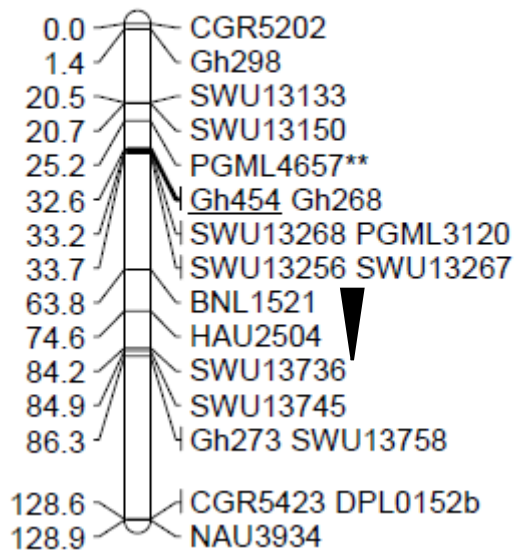

### Chr24 xzV

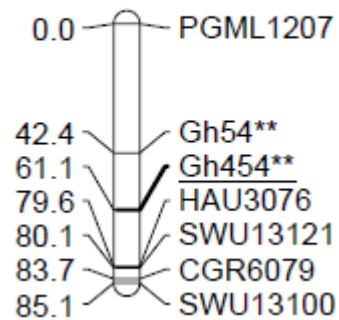

### Chr25 XZ

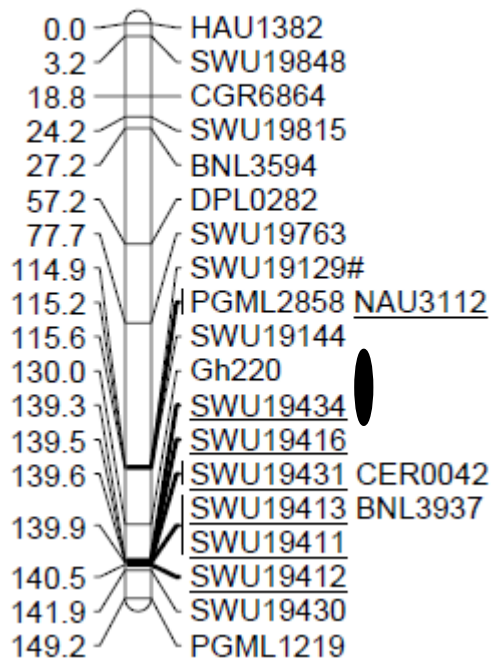

### Chr25 XZV

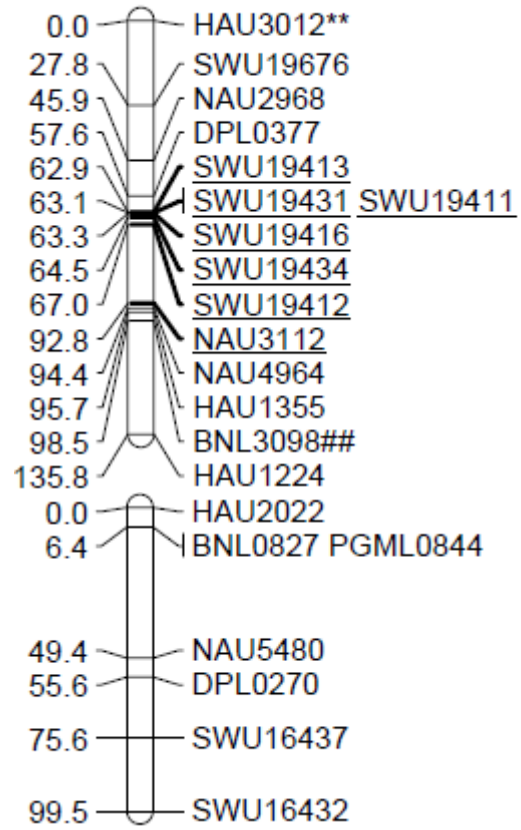

### Chr26 XZ

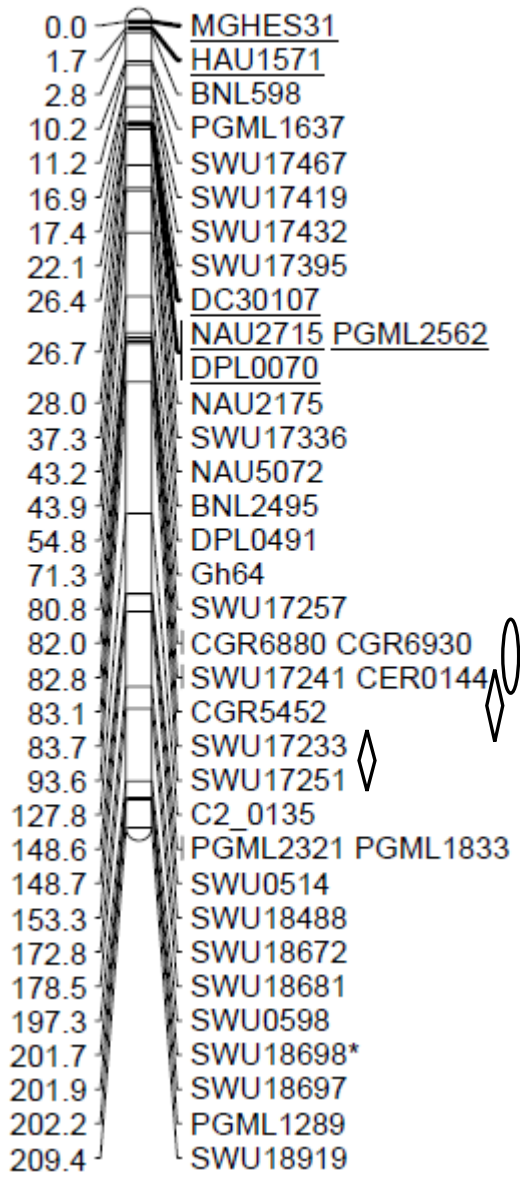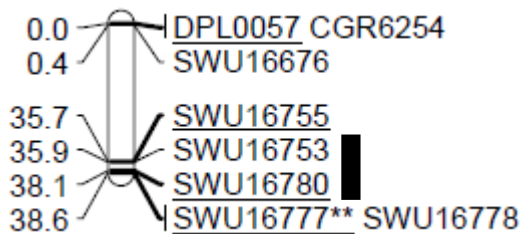

### Chr26 XZV

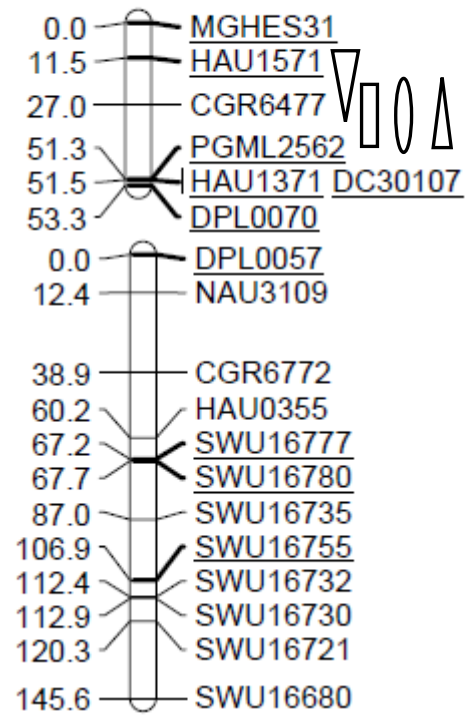

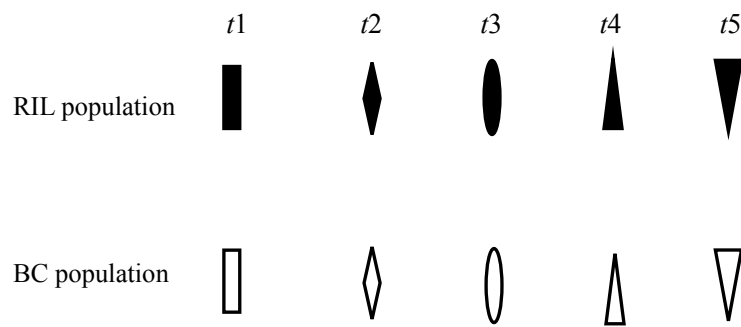

**Figure S2 Locations of QTLs controlling plant height identified in two hybrids**  
\* and \*\*, segregation distortion significant at  $P = 0.05$  and  $0.01$  levels, respectively.
