# Supplementary material for: Main Effect QTL with Dominance Determines Heterosis for Dynamic Plant Height in Upland Cotton
Source: Oxford University Press journal article supplement (doi:10.1534/g3.116.034355), 2016-10-01
Supplement: 034355_tables1.pdf [file 034355_tables1.pdf]

Table S1 The results of broad heritability of plant height

| Stage      | RIL (%) | BCF <sub>1</sub> (%) | RILV (%) | BCVF <sub>1</sub> (%) |
|------------|---------|----------------------|----------|-----------------------|
| <i>t</i> 1 | 44.55   | 57.40                | 27.91    | 45.83                 |
| <i>t</i> 2 | 50.73   | 59.82                | 33.79    | 27.09                 |
| <i>t</i> 3 | 55.42   | 48.74                | 19.11    | 45.41                 |
| <i>t</i> 4 | 56.16   | 39.46                | 46.15    | 39.39                 |
| <i>t</i> 5 | 50.91   | 38.75                | 37.67    | 38.41                 |
