# Supplementary material for: Main Effect QTL with Dominance Determines Heterosis for Dynamic Plant Height in Upland Cotton
Source: Oxford University Press journal article supplement (doi:10.1534/g3.116.034355), 2016-10-01
Supplement: 034355_tables2.pdf [file 034355_tables2.pdf]

Table S42 QTLs identified for plant height by composite interval mapping in two hybrids

| QTL               | T         | Env. | Flanking markers  | RIL'  |      |         | RIL  |      |         | BC   |      |         | MPH  |      |         | d/a | Type |
|-------------------|-----------|------|-------------------|-------|------|---------|------|------|---------|------|------|---------|------|------|---------|-----|------|
|                   |           |      |                   | LOD   | A    | Var (%) | LOD  | A    | Var (%) | LOD  | A+D  | Var (%) | LOD  | D    | Var (%) |     |      |
| XZ hybrid         |           |      |                   |       |      |         |      |      |         |      |      |         |      |      |         |     |      |
| <i>qPH-Chr2-2</i> | <i>t2</i> | E1   | PGML0700 SWU12016 |       |      |         |      |      |         |      |      |         | 3.03 | -1.1 | 10.46   | OD  |      |
| <i>qPH-Chr4-1</i> | <i>t2</i> | E2   | NAU2701 SWU18876  |       |      |         |      |      | 3.39    | 0.87 | 5.32 |         |      |      |         | A   |      |
|                   | <i>t3</i> | E1   | SWU18881 NAU2701  | 2.82  | 1.31 | 3.86    |      |      |         |      |      |         |      |      |         |     |      |
|                   | <i>t4</i> | E1   | SWU18881 NAU2701  | 2.67  | 1.34 | 4.18    |      |      |         |      |      |         |      |      |         |     |      |
|                   | <i>t4</i> | E2   | NAU2701 SWU18876  |       |      |         |      |      | 3.48    | 1.98 | 7.29 |         |      |      |         | A   |      |
|                   | <i>t5</i> | E2   | NAU2701 SWU18876  |       |      |         |      |      | 3.47    | 2.18 | 7.25 |         |      |      |         | A   |      |
| <i>qPH-Chr5-1</i> | <i>t1</i> | E1   | PGML1917 SWU17715 | 3.71  | 0.85 | 7.02    | 5.32 | 2.32 | 26.87   |      |      |         |      |      |         |     |      |
|                   | <i>t2</i> | E1   | PGML1917 SWU17715 | 5.83  | 1.98 | 14.46   | 5.59 | 3.05 | 20.49   |      |      |         |      |      |         |     |      |
|                   | <i>t3</i> | E1   | PGML1917 SWU17715 | 9.7   | 2.98 | 20.17   | 8.49 | 4.01 | 24.63   |      |      |         |      |      |         |     |      |
|                   | <i>t3</i> | E1   | PGML1917 SWU17715 |       |      |         |      |      |         |      |      |         |      |      |         |     |      |
|                   | <i>t4</i> | E2   | PGML1917 SWU17715 |       |      |         | 3.02 | 3.19 | 18.21   |      |      |         |      |      |         |     |      |
|                   | <i>t5</i> | E1   | PGML1917 SWU17715 | 10.65 | 3.64 | 26.41   |      |      |         |      |      |         |      |      |         |     |      |
|                   | <i>t5</i> | E2   | PGML1917 SWU17715 | 2.85  | 3.48 | 15.23   |      |      |         |      |      |         |      |      |         |     |      |
| <i>qPH-Chr5-2</i> | <i>t1</i> | E1   | TMB1296 HAU1603   |       |      |         | 5.59 | 1.39 | 9.64    |      |      |         |      |      |         |     |      |
|                   | <i>t2</i> | E1   | TMB1296 HAU1603   | 7.22  | 1.63 | 9.74    | 5.81 | 2.11 | 9.81    |      |      |         |      |      |         |     |      |
|                   | <i>t3</i> | E1   | TMB1296 HAU1603   | 9.79  | 2.58 | 14.97   | 8.06 | 3.10 | 14.63   |      |      |         |      |      |         |     |      |
|                   | <i>t4</i> | E1   | TMB1296 HAU1603   | 10.41 | 2.78 | 18.39   | 6.78 | 3.12 | 13.05   |      |      |         |      |      |         |     |      |
|                   | <i>t4</i> | E2   | HAU1603 PGML4457  |       |      |         | 3.28 | 1.83 | 5.94    |      |      |         |      |      |         |     |      |
|                   | <i>t5</i> | E1   | TMB1296 HAU1603   | 11.89 | 3.31 | 21.44   | 8.58 | 3.73 | 16.69   |      |      |         |      |      |         |     |      |



| QTL                | T         | Env.    | Flanking markers |         | RIL'  |      |         | RIL   |      |         | BC    |      |         | MPH  |         |         | d/a  | Type |
|--------------------|-----------|---------|------------------|---------|-------|------|---------|-------|------|---------|-------|------|---------|------|---------|---------|------|------|
|                    |           |         |                  |         | LOD   | A    | Var (%) | LOD   | A    | Var (%) | LOD   | A+D  | Var (%) | LOD  | D       | Var (%) |      |      |
| <i>qPH-Chr19-1</i> | <i>t1</i> | E1      | Gh616            | CIR139  | 12.53 | 1.53 | 22.03   |       |      |         | 6.84  | 1.11 | 12.66   |      | (±0.42) | 0.38    | PD   |      |
|                    | <i>t1</i> | E1      | Gh616            | CIR139  |       |      |         | 6.58  | 1.53 | 11.43   |       |      |         |      |         |         |      |      |
|                    | <i>t1</i> | E2      | Gh616            | CIR139  | 21.62 | 1.86 | 42.66   |       |      |         |       |      |         |      |         |         |      |      |
|                    | <i>t1</i> | E2      | NAU5330          | Gh72    |       |      |         | 20.26 | 1.63 | 35.02   |       |      |         |      |         |         |      |      |
|                    | <i>t1</i> | E2      | Gh616            | CIR139  |       |      |         |       |      |         | 18.38 | 1.41 | 32.09   | 4.43 | 0.49    | 9.29    | 0.3  | PD   |
|                    | <i>t2</i> | E1      | NAU5330          | Gh72    | 18.15 | 2.83 | 29.1    |       |      |         |       |      |         |      |         |         |      |      |
|                    | <i>t2</i> | E1      | Gh616            | CIR139  |       |      |         | 9     | 2.69 | 15.7    | 10.03 | 2.01 | 19.59   |      | (±0.68) | 0.25    | PD   |      |
|                    | <i>t2</i> | E2      | Gh616            | CIR139  | 18.59 | 2.76 | 35.26   |       |      |         |       |      |         |      |         |         |      |      |
|                    | <i>t2</i> | E2      | NAU5330          | Gh72    |       |      |         | 18.9  | 2.65 | 34.55   |       |      |         |      |         |         |      |      |
|                    | <i>t2</i> | E2      | Gh616            | CIR139  |       |      |         |       |      |         | 12.83 | 1.89 | 23.81   | 4.01 | 0.57    | 8.36    | 0.43 | PD   |
|                    | <i>t3</i> | E1      | NAU5330          | Gh72    | 12.25 | 3.07 | 21.09   |       |      |         |       |      |         |      |         |         |      |      |
|                    | <i>t3</i> | E1      | Gh616            | CIR139  |       |      |         | 4.95  | 2.37 | 8.46    | 7.38  | 1.98 | 14.1    |      | (±0.39) | 0.16    | PD   |      |
|                    | <i>t3</i> | E2      | Gh616            | CIR139  | 8.51  | 2.91 | 17.06   |       |      |         |       |      |         |      |         |         |      |      |
|                    | <i>t3</i> | E2      | Gh616            | CIR139  |       |      |         | 11.43 | 3.09 | 22.18   |       |      |         |      |         |         |      |      |
|                    | <i>t3</i> | E2      | DC40122          | NAU833a |       |      |         |       |      |         | 4.01  | 1.74 | 7.78    |      | (±1.35) | 0.44    | PD   |      |
|                    | <i>t4</i> | E1      | NAU5330          | Gh72    | 4.72  | 1.82 | 7.81    |       |      |         |       |      |         |      |         |         |      |      |
|                    | <i>t4</i> | E1      | Gh616            | CIR139  |       |      |         |       |      |         | 5.17  | 1.49 | 10.28   |      | (±0.33) | 0.18    | PD   |      |
| <i>t4</i>          | E2        | Gh616   | CIR139           | 3.11    | 2.2   | 6.66 |         |       |      |         |       |      |         |      |         |         |      |      |
| <i>t5</i>          | E1        | NAU5330 | Gh72             | 3.94    | 1.87  | 6.59 |         |       |      |         |       |      |         |      |         |         |      |      |
| <i>t5</i>          | E2        | NAU5330 | Gh72             |         |       |      | 3.06    | 2.03  | 5.63 |         |       |      |         |      |         |         |      |      |
| <i>qPH-Chr19-2</i> | <i>t1</i> | E1      | NAU1042          | NAU3437 | 9.26  | 1.34 | 16.95   |       |      |         | 4.18  | 0.87 | 7.99    |      | (±0.47) | 0.35    | PD   |      |
|                    | <i>t1</i> | E2      | NAU1042          | NAU3437 |       |      |         | 13.44 | 1.49 | 29.23   |       |      |         |      |         |         |      |      |

| QTL                | T  | Env. | Flanking markers |          | RIL'  |       |         | RIL  |      |         | BC   |       |         | MPH  |      |         | d/a | Type |
|--------------------|----|------|------------------|----------|-------|-------|---------|------|------|---------|------|-------|---------|------|------|---------|-----|------|
|                    |    |      |                  |          | LOD   | A     | Var (%) | LOD  | A    | Var (%) | LOD  | A+D   | Var (%) | LOD  | D    | Var (%) |     |      |
|                    | t2 | E1   | NAU1269          | NAU828   | 12.45 | 2.45  | 21.2    |      |      |         |      |       |         |      |      |         |     |      |
|                    | t2 | E1   | NAU1042          | NAU3437  |       |       |         |      |      |         |      |       | 2.69    | 0.86 | 6.25 | 0.32    | PD  |      |
|                    | t2 | E2   | NAU1042          | NAU3437  |       |       |         | 13.8 | 2.7  | 36.07   | 8.91 | 1.81  | 22.73   |      |      |         |     |      |
|                    | t3 | E2   | NAU1042          | NAU3437  |       |       |         | 9.19 | 3.36 | 26.95   |      |       |         |      |      |         |     |      |
|                    | t4 | E2   | NAU833a          | NAU1269  |       |       |         | 3.78 | 2.02 | 6.95    |      |       |         |      |      |         |     |      |
| <b>qPH-Chr20-1</b> | t1 | E1   | CGR6154          | SWU20246 |       |       |         |      |      |         | 3.18 | -1.17 | 14.79   |      |      |         | A   |      |
|                    | t2 | E1   | CGR6154          | SWU20246 | 3.39  | -1.09 | 4.33    |      |      |         |      |       |         |      |      |         |     |      |
|                    | t3 | E1   | CGR6154          | SWU20246 | 2.63  | -1.74 | 6.88    |      |      |         |      |       |         |      |      |         |     |      |
|                    | t4 | E1   | CGR6154          | SWU20246 |       |       |         |      |      |         | 2.68 | -1.79 | 15.38   |      |      |         | A   |      |
|                    | t5 | E1   | CGR6154          | SWU20246 |       |       |         |      |      |         | 4.37 | -2.23 | 22.78   |      |      |         |     |      |
| <b>qPH-Chr20-2</b> | t2 | E1   | CER0167          | SWU20064 |       |       |         |      |      |         | 2.74 | -1.38 | 9.52    |      |      |         | A   |      |
|                    | t2 | E2   | CER0167          | SWU20064 |       |       |         |      |      |         | 3.14 | -1.15 | 9.52    |      |      |         | A   |      |
|                    | t3 | E1   | CER0167          | SWU20064 |       |       |         |      |      |         | 2.96 | -1.69 | 10.69   |      |      |         | A   |      |
|                    | t3 | E2   | CER0167          | SWU20064 | 3.03  | -2.12 | 9.61    |      |      |         |      |       |         |      |      |         |     |      |
|                    | t4 | E2   | CER0167          | SWU20064 |       |       |         |      |      |         | 2.50 | -2.32 | 9.86    |      |      |         | A   |      |
| <b>qPH-Chr20-3</b> | t1 | E1   | DPL0319          | HAU1378  |       |       |         | 5.26 | 1.4  | 9.83    |      |       |         |      |      |         |     |      |
|                    | t2 | E1   | SWU20035         | DPL0319  |       |       |         | 5.57 | 2.37 | 12.05   |      |       |         |      |      |         |     |      |
|                    | t3 | E1   | SWU20035         | DPL0319  |       |       |         | 2.71 | 2.19 | 7.26    |      |       |         |      |      |         |     |      |
|                    | t4 | E1   | SWU20035         | DPL0319  |       |       |         | 2.83 | 2.44 | 8.01    |      |       |         |      |      |         |     |      |
|                    | t5 | E1   | SWU20035         | DPL0319  |       |       |         | 3.73 | 2.83 | 9.40    |      |       |         |      |      |         |     |      |
| <b>qPH-Chr21-1</b> | t1 | E1   | DPL0777          | CGR5217  |       |       |         |      |      |         | 3.94 | 0.85  | 7.62    |      |      |         | A   |      |
|                    | t2 | E1   | DPL0777          | CGR5217  |       |       |         |      |      |         | 3.71 | 1.20  | 6.97    |      |      |         | A   |      |



| QTL                | T  | Env. | Flanking markers |          | RIL' |       |         | RIL  |       |         | BC   |       |         | MPH     |      |         | d/a | Type |
|--------------------|----|------|------------------|----------|------|-------|---------|------|-------|---------|------|-------|---------|---------|------|---------|-----|------|
|                    |    |      |                  |          | LOD  | A     | Var (%) | LOD  | A     | Var (%) | LOD  | A+D   | Var (%) | LOD     | D    | Var (%) |     |      |
|                    | t5 | E2   | HAU0921          | NAU2768  | 2.51 | 1.64  | 5.25    |      |       |         |      |       |         |         |      |         |     |      |
| <b>qPH-Chr9-1</b>  | t1 | E1   | SHIN0830         | Gh111    | 4.10 | 0.71  | 7.36    |      |       |         |      |       |         |         |      |         |     |      |
|                    | t3 | E2   | SHIN0830         | Gh111    |      |       |         | 3.63 | 1.53  | 7.43    |      |       |         |         |      |         |     |      |
| <b>qPH-Chr13-1</b> | t2 | E1   | SWU13032         | HAU2850  |      |       |         | 3.42 | -1.23 | 8.15    |      |       |         |         |      |         |     |      |
|                    | t3 | E1   | SWU13032         | HAU2850  |      |       |         | 3.73 | -2.17 | 9.94    |      |       |         |         |      |         |     |      |
|                    | t4 | E1   | SWU13032         | HAU2850  |      |       |         | 4.55 | -2.29 | 9.48    |      |       |         |         |      |         |     |      |
|                    | t4 | E2   | SWU13032         | HAU2850  | 3.08 | -1.90 | 8.90    | 3.08 | -1.97 | 9.01    | 3.12 | -1.46 | 10.02   | (±0.51) | 0.26 | PD      |     |      |
| <b>qPH-Chr13-2</b> | t2 | E1   | NAU3398          | CGR5331  |      |       |         | 3.63 | -1.04 | 5.76    |      |       |         |         |      |         |     |      |
|                    | t3 | E1   | NAU3398          | CGR5331  |      |       |         | 3.55 | -1.62 | 5.46    |      |       |         |         |      |         |     |      |
|                    | t4 | E1   | NAU3398          | CGR5331  |      |       |         | 5.02 | -1.98 | 7.09    |      |       |         |         |      |         |     |      |
|                    | t4 | E2   | NAU3398          | CGR5331  | 3.19 | -1.59 | 6.19    |      |       |         |      |       |         |         |      |         |     |      |
|                    | t5 | E1   | NAU3398          | CGR5331  |      |       |         | 5.28 | -2.03 | 7.10    |      |       |         |         |      |         |     |      |
|                    | t5 | E2   | NAU3398          | CGR5331  | 3.44 | -1.83 | 7.01    |      |       |         |      |       |         |         |      |         |     |      |
| <b>qPH-Chr14-1</b> | t1 | E1   | DPL0502          | ICR00401 | 3.05 | 0.63  | 5.95    |      |       |         |      |       |         |         |      |         |     |      |
| <b>qPH-Chr14-2</b> | t1 | E2   | TMB0071          | HAU1000  |      |       |         | 2.69 | -0.49 | 4.94    |      |       |         |         |      |         |     |      |
|                    | t2 | E2   | TMB0071          | HAU1000  | 4.20 | -1.02 | 8.72    | 4.91 | -1.10 | 9.87    |      |       |         |         |      |         |     |      |
|                    | t3 | E2   | TMB0071          | HAU1000  | 2.72 | -1.24 | 6.17    |      |       |         |      |       |         |         |      |         |     |      |
|                    | t4 | E2   | TMB0071          | HAU1000  | 3.60 | -1.78 | 7.73    |      |       |         |      |       |         |         |      |         |     |      |
|                    | t4 | E2   | HAU1000          | TMB1931  |      |       |         | 3.27 | -1.69 | 6.46    |      |       |         |         |      |         |     |      |
| <b>qPH-Chr15-1</b> | t3 | E2   | NAU3736          | SWU11691 | 3.42 | 1.54  | 9.52    |      |       |         |      |       |         |         |      |         |     |      |
| <b>qPH-Chr16-1</b> | t1 | E2   | SWU10211         | SWU10266 |      |       |         | 3.22 | 0.53  | 5.85    |      |       |         |         |      |         |     |      |
|                    | t4 | E2   | HAU1129          | C2_0011B |      |       |         | 4.08 | 2.35  | 12.84   |      |       |         |         |      |         |     |      |

| QTL                | T  | Env. | Flanking markers |          | RIL' |       |         | RIL  |       |         | BC   |       |         | MPH     |       |         | d/a | Type |
|--------------------|----|------|------------------|----------|------|-------|---------|------|-------|---------|------|-------|---------|---------|-------|---------|-----|------|
|                    |    |      |                  |          | LOD  | A     | Var (%) | LOD  | A     | Var (%) | LOD  | A+D   | Var (%) | LOD     | D     | Var (%) |     |      |
|                    | t5 | E2   | HAU1129          | C2_0011B |      |       |         | 4.14 | 2.77  | 15.16   |      |       |         |         |       |         |     |      |
| <i>qPH-Chr16-2</i> | t2 | E2   | SWU10211         | SWU10266 |      |       |         | 3.6  | 0.92  | 7.06    |      |       |         |         |       |         |     |      |
|                    | t4 | E2   | SWU10211         | SWU10266 |      |       |         | 4.9  | 2.06  | 9.74    |      |       |         |         |       |         |     |      |
|                    | t5 | E2   | SWU10211         | SWU10266 |      |       |         | 4.63 | 2.23  | 9.73    |      |       |         |         |       |         |     |      |
| <i>qPH-Chr16-3</i> | t4 | E2   | SWU10266         | SWU18366 |      |       |         | 3.04 | 2.55  | 14.99   |      |       |         |         |       |         |     |      |
| <i>qPH-Chr18-1</i> | t1 | E2   | TMB1638          | CGR6812  | 2.89 | -0.79 | 10.15   | 4.29 | -0.86 | 15.55   |      |       |         |         |       |         |     |      |
|                    | t2 | E2   | TMB1638          | CGR6812  | 2.77 | -0.98 | 8.12    | 3.72 | -1.38 | 15.69   |      |       |         |         |       |         |     |      |
| <i>qPH-Chr21-1</i> | t4 | E1   | JESPR154         | BNL5602  |      |       |         |      |       |         | 2.75 | -1.12 | 5.61    |         |       |         | A   |      |
|                    | t5 | E1   | JESPR154         | BNL5602  |      |       |         |      |       |         | 3.63 | -1.61 | 7.98    |         |       |         | A   |      |
| <i>qPH-Chr23-1</i> | t1 | E1   | CGR5158          | HAU1758  |      |       |         | 4.96 | -1.52 | 25.69   |      |       |         |         |       |         |     |      |
|                    | t2 | E1   | CGR5158          | HAU1758  |      |       |         | 4.42 | -1.26 | 7.6     |      |       |         |         |       |         |     |      |
|                    | t3 | E1   | CGR5158          | HAU1758  |      |       |         | 8.72 | -2.8  | 15.02   |      |       |         |         |       |         |     |      |
|                    | t4 | E1   | CGR5158          | HAU1758  |      |       |         | 8.3  | -2.76 | 12.59   |      |       |         |         |       |         |     |      |
|                    | t5 | E1   | CGR5158          | HAU1758  |      |       |         | 8.67 | -2.86 | 12.58   |      |       |         |         |       |         |     |      |
| <i>qPH-Chr23-2</i> | t4 | E2   | BNL3482          | HAU0244  |      |       |         |      |       |         |      |       | 3.65    | -1.31   | 11.11 |         | OD  |      |
|                    | t5 | E2   | BNL3482          | HAU0244  |      |       |         |      |       |         |      |       | 2.53    | -1.27   | 6.41  |         | OD  |      |
| <i>qPH-Chr23-3</i> | t1 | E1   | NAU2140          | DC40286  | 3.24 | -0.67 | 6.84    |      |       |         |      |       |         |         |       |         |     |      |
|                    | t2 | E1   | NAU2140          | DC40286  | 5.05 | -1.31 | 10.93   |      |       |         | 6.77 | -1.4  | 18.14   | (±0.09) |       | 0.07    | PD  |      |
|                    | t3 | E2   | NAU2140          | DC40286  |      |       |         | 3.49 | 1.76  | 10.02   |      |       |         |         |       |         |     |      |
|                    | t5 | E1   | NAU2140          | DC40286  |      |       |         |      |       |         | 4.43 | -1.91 | 11.09   |         |       |         | A   |      |
| <i>qPH-Chr23-4</i> | t1 | E1   | DC40286          | PGML1434 |      |       |         | 7.76 | -1.16 | 15.51   | 4.92 | -0.88 | 13.07   |         |       |         |     |      |
|                    | t1 | E2   | DC40286          | PGML1434 |      |       |         | 5.55 | 0.74  | 11.07   |      |       |         |         |       |         |     |      |

| QTL                       | T         | Env. | Flanking markers |          | RIL' |       |         | RIL   |       |         | BC   |       |         | MPH     |      |         | d/a | Type |
|---------------------------|-----------|------|------------------|----------|------|-------|---------|-------|-------|---------|------|-------|---------|---------|------|---------|-----|------|
|                           |           |      |                  |          | LOD  | A     | Var (%) | LOD   | A     | Var (%) | LOD  | A+D   | Var (%) | LOD     | D    | Var (%) |     |      |
|                           | <i>t2</i> | E1   | DC40286          | PGML1434 |      |       |         | 8.60  | -1.71 | 15.41   |      |       |         |         |      |         |     |      |
|                           | <i>t3</i> | E1   | DC40286          | PGML1434 | 3.22 | -1.43 | 7.33    | 7.86  | -2.56 | 13.52   | 3.97 | -1.35 | 9.2     | (±1.21) |      | 0.47    | PD  |      |
|                           | <i>t4</i> | E1   | DC40286          | PGML1434 |      |       |         | 11.44 | -3.2  | 18.29   | 3.06 | -1.25 | 6.83    | (±1.95) |      | 0.61    | PD  |      |
|                           | <i>t5</i> | E1   | DC40286          | PGML1434 |      |       |         | 14.57 | -4.23 | 23.25   |      |       |         |         |      |         |     |      |
| <b><i>qPH-Chr26-1</i></b> | <i>t1</i> | E2   | CGR6477          | PGML2562 |      |       |         |       |       |         | 3.46 | -0.55 | 9.15    |         |      |         | A   |      |
|                           | <i>t3</i> | E2   | CGR6477          | PGML2562 |      |       |         |       |       |         | 2.56 | -1.34 | 11.51   |         |      |         | A   |      |
|                           | <i>t4</i> | E2   | CGR6477          | PGML2562 |      |       |         |       |       |         | 3.17 | -1.56 | 11.38   |         |      |         | A   |      |
|                           | <i>t5</i> | E2   | HAU1571          | CGR6477  |      |       |         |       |       |         | 3.07 | -1.46 | 8.57    |         |      |         | A   |      |
| <b><i>qPH-Chr26-2</i></b> | <i>t4</i> | E2   | SWU16721         | SWU16680 |      |       |         |       |       |         |      |       |         | 3.27    | 1.01 | 7.31    | OD  |      |
|                           | <i>t5</i> | E2   | SWU16721         | SWU16680 |      |       |         |       |       |         |      |       |         | 3.24    | 1.31 | 7.46    | OD  |      |

Bold figures indicate the QTL was detected in more than two environments or populations simultaneously

[QTL identified from present study and the QTL from Shang et al.\(2015\) were compared, and common QTLs are shown as blue figures](#)

Env., Environment, E1: Handan; E2: Cangzhou; T, Stage t1, t2, t3, t4, t5

Effect, the genetic expectation of a QTL effect obtained is the additive effect (A) when estimated from the RILs and RIL's, the additive and dominance effects (A+D) from the BCF<sub>1</sub> mean values

Var%, Phenotypic variation explained by a single QTL

d/a, dominance ratio

Type, The QTLs which were identified in backcross population were grouped into three types: (A) additive effect, (PD) partial dominance effect, (OD) overdominance effect.
