# Supplementary material for: Main Effect QTL with Dominance Determines Heterosis for Dynamic Plant Height in Upland Cotton
Source: Oxford University Press journal article supplement (doi:10.1534/g3.116.034355), 2016-10-01
Supplement: 034355_tables3.pdf [file 034355_tables3.pdf]

| QTL                       | Stage         | Env. | Flanking markers |          | RIL' |       |      | RIL  |                |       | BC   |       |      | MPH  |       |      |
|---------------------------|---------------|------|------------------|----------|------|-------|------|------|----------------|-------|------|-------|------|------|-------|------|
|                           |               |      |                  |          | LOD  | A     | Var% | LOD  | A              | Var%  | LOD  | A+D   | Var% | LOD  | D     | Var% |
| <b><i>qPH-Chr26-3</i></b> | $\Delta t1-2$ | E1   | CGR6930          | SWU17241 |      |       |      |      |                |       | 3.36 | -0.48 | 5.99 |      |       |      |
|                           | $\Delta t2-3$ | E2   | CGR6930          | SWU17241 |      |       |      |      |                |       |      |       |      | 3.06 | -0.43 | 6.94 |
| <b><i>qPH-Chr26-4</i></b> | $\Delta t3-4$ | E1   | C2_0135          | PGML2321 | 3.03 | 0.75  | 7.49 |      |                |       |      |       |      |      |       |      |
| XZV hybrid                |               |      |                  |          |      |       |      |      |                |       |      |       |      |      |       |      |
| <b><i>qPH-Chr1-1</i></b>  | $\Delta t4-5$ | E2   | ICR03725         | ICR03724 | 3.34 | 0.86  | 8.03 |      |                |       |      |       |      |      |       |      |
| <b><i>qPH-Chr2-1</i></b>  | $\Delta t2-3$ | E2   | SWU11889         | JESPR304 |      |       |      | 3.05 | 0.95           | 6.57  |      |       |      |      |       |      |
|                           | $\Delta t2-3$ | E1   | TMB1268          | SWU11976 |      |       |      |      |                |       | 2.63 | -0.63 | 5.51 |      |       |      |
| <b><i>qPH-Chr11-1</i></b> | $\Delta t1-2$ | E1   | CGR5421          | MUSS278  | 2.65 | -0.55 | 5.62 |      |                |       |      |       |      |      |       |      |
|                           | $\Delta t1-2$ | E1   | CGR5421          | MUSS278  |      |       |      | 2.65 | -0.57          | 5.26  |      |       |      |      |       |      |
| <b><i>qPH-Chr12-1</i></b> | $\Delta t1-2$ | E2   | Gh568            | CGR5111  | 4.14 | 0.77  | 8.52 |      |                |       |      |       |      |      |       |      |
| <b><i>qPH-Chr13-1</i></b> | $\Delta t1-2$ | E1   | SWU13032         | HAU2850  |      |       |      | 3.89 | -0.79          | 10.42 |      |       |      |      |       |      |
|                           | $\Delta t1-2$ | E1   | SWU13032         | HAU2850  | 3.97 | -0.72 | 9.54 |      |                |       |      |       |      |      |       |      |
| <b><i>qPH-Chr13-2</i></b> | $\Delta t1-2$ | E1   | NAU3398          | CGR5331  |      |       |      | 4.53 | -0.81          | 10.73 |      |       |      |      |       |      |
| <b><i>qPH-Chr14-1</i></b> | $\Delta t4-5$ | E1   | HAU1000          | TMB1931  |      |       |      | 7.98 | 0.75           | 19.09 |      |       |      |      |       |      |
| <b><i>qPH-Chr14-2</i></b> | $\Delta t1-2$ | E2   | BNL3661          | PGML4891 | 3.10 | 0.66  | 6.29 |      |                |       |      |       |      |      |       |      |
|                           | $\Delta t1-2$ | E2   | BNL3661          | PGML4891 |      |       |      |      |                |       | 3.25 | 0.59  | 6.78 |      |       |      |
| <b><i>qPH-Chr15-1</i></b> | $\Delta t2-3$ | E2   | NAU3736          | SWU11691 | 3.01 | 0.81  | 8.66 |      |                |       |      |       |      |      |       |      |
| <b><i>qPH-Chr16-1</i></b> | $\Delta t2-3$ | E1   | DPL0897          | SWU20341 |      |       |      |      |                |       | 3.43 | 0.72  | 7.13 |      |       |      |
| <b><i>qPH-Chr20-1</i></b> | $\Delta t3-4$ | E1   | SWU20246         | Gh451    |      |       |      |      |                |       | 3.40 | -0.69 | 7.15 |      |       |      |
|                           | $\Delta t3-4$ | E1   | SWU20246         | Gh451    |      |       |      |      | ( $\pm 0.11$ ) |       |      |       |      | 3.80 | -0.58 | 8.27 |
| <b><i>qPH-Chr20-2</i></b> | $\Delta t2-3$ | E1   | DPL0131          | DPL0777  |      |       |      |      |                |       | 3.84 | -0.76 | 8.02 |      |       |      |
|                           | $\Delta t2-3$ | E1   | DPL0131          | DPL0777  |      |       |      | 2.60 | -0.79          | 5.05  |      |       |      |      |       |      |



| QTL                       | Stage         | Env. | Flanking markers | RIL'     |   |      | RIL  |       |      | BC  |      |       | MPH   |   |      |  |
|---------------------------|---------------|------|------------------|----------|---|------|------|-------|------|-----|------|-------|-------|---|------|--|
|                           |               |      |                  | LOD      | A | Var% | LOD  | A     | Var% | LOD | A+D  | Var%  | LOD   | D | Var% |  |
|                           | $\Delta t3-4$ | E2   | DPL0377          | SWU19413 |   |      |      |       |      |     | 4.44 | -0.86 | 11.22 |   |      |  |
| <b><i>qPH-Chr26-1</i></b> | $\Delta t3-4$ | E1   | SWU16777         | SWU16780 |   |      | 3.03 | -0.59 | 5.96 |     |      |       |       |   |      |  |
|                           | $\Delta t4-5$ | E2   | SWU16780         | SWU16735 |   |      |      |       |      |     | 3.20 | 0.64  | 6.75  |   |      |  |

Bold figures indicate the QTL was detected in more than two environments or populations simultaneously

Env., Environment, E1: Handan; E2: Cangzhou

Effect, the genetic expectation of a QTL effect obtained is the additive effect (A) when estimated from the RILs and RIL's, the additive and dominance effects (A+D) from the BCF<sub>1</sub> mean values

Var%, Phenotypic variation explained by a single QTL
