# Supplementary material for: Main Effect QTL with Dominance Determines Heterosis for Dynamic Plant Height in Upland Cotton
Source: Oxford University Press journal article supplement (doi:10.1534/g3.116.034355), 2016-10-01
Supplement: 034355_tables4.pdf [file 034355_tables4.pdf]

Table S4 Main effects and environmental interactions detected for plant height in RIL and RILV populations by inclusive composite interval mapping

| Stage           | Chr. | Position<br>(cM) | Flanking markers |          | LOD   | V(A)  | V(AE) | A     | AE1   | AE2   |
|-----------------|------|------------------|------------------|----------|-------|-------|-------|-------|-------|-------|
| RIL population  |      |                  |                  |          |       |       |       |       |       |       |
| <i>t1</i>       | 2    | 14               | SWU12025         | SWU11889 | 2.62  | 1.89  | 0.69  | -0.51 | -0.31 | 0.31  |
|                 | 5    | 115              | TMB1296          | HAU1603  | 5.62  | 4.52  | 3.34  | 0.78  | 0.67  | -0.67 |
|                 | 10   | 42               | SWU20260         | Gh144    | 2.97  | 2.04  | 0.10  | -0.52 | -0.12 | 0.12  |
|                 | 11   | 95               | CGR5421          | ICR08245 | 2.72  | 0.03  | 1.72  | 0.07  | 0.48  | -0.48 |
|                 | 11   | 201              | NAU1014          | ICR10344 | 3.25  | 1.62  | 0.02  | 0.47  | -0.06 | 0.06  |
|                 | 16   | 79               | C2_0011B         | DC20124  | 2.90  | 1.57  | 0.01  | 0.46  | -0.03 | 0.03  |
|                 | 19   | 6                | NAU5330          | Gh72     | 26.61 | 18.08 | 0.06  | 1.57  | -0.09 | 0.09  |
|                 | 20   | 132              | SWU20035         | DPL0319  | 4.75  | 2.96  | 3.22  | 0.63  | 0.66  | -0.66 |
|                 | 31   | 36               | SWU16753         | SWU16780 | 3.90  | 1.19  | 0.38  | -0.40 | 0.23  | -0.23 |
| <i>t2</i>       | 10   | 42               | SWU20260         | Gh144    | 3.34  | 2.53  | 0.09  | -0.90 | -0.17 | 0.17  |
|                 | 11   | 201              | NAU1014          | ICR10344 | 3.88  | 2.64  | 0.00  | 0.92  | -0.01 | 0.01  |
|                 | 19   | 6                | NAU5330          | Gh72     | 24.88 | 20.95 | 0.01  | 2.60  | 0.04  | -0.04 |
|                 | 20   | 132              | SWU20035         | DPL0319  | 4.05  | 2.27  | 2.53  | 0.85  | 0.90  | -0.90 |
| <i>t3</i>       | 10   | 42               | SWU20260         | Gh144    | 5.11  | 4.33  | 0.02  | -1.51 | 0.10  | -0.10 |
|                 | 11   | 201              | NAU1014          | ICR10344 | 4.53  | 4.00  | 0.13  | 1.45  | 0.26  | -0.26 |
|                 | 19   | 6                | NAU5330          | Gh72     | 14.15 | 13.13 | 0.20  | 2.64  | -0.32 | 0.32  |
|                 | 20   | 129              | SWU20035         | DPL0319  | 2.99  | 1.51  | 1.30  | 0.89  | 0.82  | -0.82 |
|                 | 24   | 3                | Gh298            | SWU13133 | 2.91  | 2.48  | 0.12  | -1.14 | -0.26 | 0.26  |
|                 | 25   | 131              | Gh220            | SWU19434 | 2.92  | 2.39  | 0.29  | 1.12  | 0.39  | -0.39 |
| <i>t4</i>       | 5    | 115              | TMB1296          | HAU1603  | 3.09  | 1.26  | 1.34  | 0.90  | -0.93 | 0.93  |
|                 | 10   | 42               | SWU20260         | Gh144    | 5.70  | 4.90  | 0.20  | -1.77 | 0.36  | -0.36 |
|                 | 11   | 201              | NAU1014          | ICR10344 | 5.90  | 5.42  | 0.04  | 1.86  | -0.16 | 0.16  |
|                 | 19   | 7                | Gh616            | CIR139   | 6.02  | 5.51  | 0.09  | 1.90  | -0.24 | 0.24  |
|                 | 20   | 129              | SWU20035         | DPL0319  | 3.34  | 1.71  | 1.85  | 1.04  | 1.09  | -1.09 |
|                 | 25   | 128              | SWU19144         | Gh220    | 2.75  | 2.67  | 0.01  | 1.30  | 0.09  | -0.09 |
| <i>t5</i>       | 4    | 0                | SWU18881         | NAU2701  | 2.55  | 2.62  | 0.00  | 1.42  | 0.05  | -0.05 |
|                 | 10   | 42               | SWU20260         | Gh144    | 3.53  | 3.47  | 0.01  | -1.64 | 0.07  | -0.07 |
|                 | 11   | 201              | NAU1014          | ICR10344 | 6.93  | 7.20  | 0.08  | 2.35  | -0.25 | 0.25  |
|                 | 19   | 9                | Gh616            | CIR139   | 2.92  | 3.00  | 0.02  | 1.56  | -0.12 | 0.12  |
|                 | 24   | 67               | BNL1521          | HAU2504  | 3.07  | 2.25  | 0.80  | 1.31  | -0.78 | 0.78  |
|                 | 25   | 126              | SWU19144         | Gh220    | 3.61  | 3.67  | 0.02  | 1.68  | 0.12  | -0.12 |
| RILV population |      |                  |                  |          |       |       |       |       |       |       |
| <i>t1</i>       | 1    | 183              | HAU2489          | DPL0790  | 4.65  | 3.23  | 1.60  | 0.46  | 0.33  | -0.33 |
|                 | 14   | 1                | HAU0883          | CIR228   | 4.05  | 3.43  | 0.25  | 0.47  | 0.13  | -0.13 |

| Stage     | Chr. | Position<br>(cM) | Flanking markers |          | LOD   | V(A) | V(AE) | A     | AE1   | AE2   |
|-----------|------|------------------|------------------|----------|-------|------|-------|-------|-------|-------|
|           | 16   | 61               | C2_0011B         | SWU10211 | 3.39  | 2.33 | 0.21  | 0.39  | -0.12 | 0.12  |
|           | 19   | 18               | HAU3069          | SWU17789 | 3.16  | 2.58 | 0.05  | 0.41  | 0.06  | -0.06 |
|           | 23   | 0                | CGR5158          | HAU1758  | 5.57  | 1.66 | 4.12  | -0.34 | -0.54 | 0.54  |
|           | 23   | 202              | DC40286          | PGML1434 | 14.29 | 0.20 | 12.34 | -0.12 | -0.90 | 0.90  |
|           | 29   | 12               | SHIN0830         | Gh111    | 3.62  | 3.07 | 0.26  | 0.45  | 0.13  | -0.13 |
|           | 30   | 18               | TMB1638          | CGR6812  | 3.52  | 2.25 | 0.33  | -0.38 | 0.15  | -0.15 |
| <i>t2</i> | 13   | 33               | NAU3398          | CGR5331  | 3.16  | 2.44 | 0.87  | -0.61 | -0.36 | 0.36  |
|           | 23   | 0                | CGR5158          | HAU1758  | 6.48  | 1.67 | 5.50  | -0.52 | -0.94 | 0.94  |
|           | 23   | 202              | DC40286          | PGML1434 | 7.89  | 1.47 | 6.81  | -0.47 | -1.02 | 1.02  |
|           | 32   | 2                | TMB0071          | HAU1000  | 3.29  | 2.89 | 0.38  | -0.66 | 0.24  | -0.24 |
| <i>t3</i> | 13   | 33               | NAU3398          | CGR5331  | 4.16  | 2.78 | 1.36  | -1.04 | -0.72 | 0.72  |
|           | 23   | 0                | CGR5158          | HAU1758  | 8.87  | 3.46 | 6.09  | -1.20 | -1.59 | 1.59  |
|           | 23   | 200              | NAU2140          | DC40286  | 8.42  | 0.58 | 7.69  | -0.48 | -1.73 | 1.73  |
|           | 29   | 12               | SHIN0830         | Gh111    | 2.82  | 2.56 | 0.17  | 1.00  | -0.26 | 0.26  |
|           | 32   | 4                | HAU1000          | TMB1931  | 3.06  | 2.95 | 0.01  | -1.07 | 0.05  | -0.05 |
| <i>t4</i> | 13   | 17               | SWU13032         | HAU2850  | 3.35  | 1.98 | 0.98  | -0.98 | 0.69  | -0.69 |
|           | 13   | 33               | NAU3398          | CGR5331  | 5.68  | 3.52 | 1.46  | -1.30 | -0.84 | 0.84  |
|           | 16   | 61               | C2_0011B         | SWU10211 | 3.89  | 2.56 | 1.14  | 1.11  | -0.74 | 0.74  |
|           | 23   | 0                | CGR5158          | HAU1758  | 8.03  | 2.62 | 4.73  | -1.16 | -1.56 | 1.56  |
|           | 23   | 202              | DC40286          | PGML1434 | 9.37  | 3.37 | 5.10  | -1.28 | -1.57 | 1.57  |
|           | 32   | 3                | TMB0071          | HAU1000  | 4.00  | 3.16 | 0.57  | -1.23 | 0.52  | -0.52 |
| <i>t5</i> | 13   | 33               | NAU3398          | CGR5331  | 6.50  | 5.29 | 0.37  | -1.68 | -0.45 | 0.45  |
|           | 16   | 61               | C2_0011B         | SWU10211 | 3.10  | 2.69 | 0.71  | 1.20  | -0.62 | 0.62  |
|           | 23   | 0                | CGR5158          | HAU1758  | 8.44  | 2.17 | 5.08  | -1.12 | -1.71 | 1.71  |
|           | 23   | 61               | SHIN1076         | BNL3482  | 2.54  | 1.83 | 0.23  | 1.02  | 0.36  | -0.36 |
|           | 23   | 202              | DC40286          | PGML1434 | 11.48 | 2.74 | 7.21  | -1.22 | -1.97 | 1.97  |
|           | 29   | 12               | SHIN0830         | Gh111    | 2.70  | 2.31 | 0.43  | 1.11  | -0.48 | 0.48  |

Chr represents the linkage group number of the loci being tested in the analysis.

V(A): Phenotypic variation explained by additive effect at the current scanning position.

V(AE): Phenotypic variation explained by additive by environment effect at the current scanning position.

A, the additive effect.
