# Supplementary material for: Main Effect QTL with Dominance Determines Heterosis for Dynamic Plant Height in Upland Cotton
Source: Oxford University Press journal article supplement (doi:10.1534/g3.116.034355), 2016-10-01
Supplement: 034355_tables5.pdf [file 034355_tables5.pdf]

Table S5 Main effects and environmental interactions detected for plant height in BCF<sub>1</sub> and BCVF<sub>1</sub> populations by inclusive composite interval mapping

| Trait                        | Chr. | Position<br>(cM) | Flanking markers |           | LOD   | V(A)  | V(AE) | A     | AE1   | AE2   |
|------------------------------|------|------------------|------------------|-----------|-------|-------|-------|-------|-------|-------|
| BCF <sub>1</sub> population  |      |                  |                  |           |       |       |       |       |       |       |
| <i>t1</i>                    | 7    | 68               | CGR5372          | SWU10205  | 5.86  | 4.84  | 0.29  | -0.60 | -0.15 | 0.15  |
|                              | 16   | 79               | C2_0011B         | DC20124   | 4.56  | 2.38  | 0.52  | 0.42  | -0.20 | 0.20  |
|                              | 19   | 7                | Gh616            | CIR139    | 22.56 | 18.75 | 0.22  | 1.20  | -0.13 | 0.13  |
|                              | 20   | 26               | CGR6154          | SWU20246  | 2.80  | 1.90  | 0.69  | -0.38 | -0.23 | 0.23  |
|                              | 21   | 252              | DPL0777          | CGR5217   | 3.34  | 1.28  | 2.13  | 0.31  | 0.40  | -0.40 |
|                              | 26   | 51               | BNL2495          | DPL0491   | 2.94  | 2.08  | 0.75  | -0.40 | -0.24 | 0.24  |
| <i>t2</i>                    | 4    | 2                | SWU18881         | NAU2701   | 3.12  | 2.33  | 0.09  | 0.62  | -0.12 | 0.12  |
|                              | 7    | 66               | CGR5372          | SWU10205  | 2.94  | 2.26  | 0.00  | -0.61 | 0.01  | -0.01 |
|                              | 19   | 7                | Gh616            | CIR139    | 22.12 | 21.45 | 0.07  | 1.91  | 0.11  | -0.11 |
|                              | 20   | 90               | CER0167          | SWU20064  | 5.84  | 4.55  | 0.00  | -0.87 | 0.00  | 0.00  |
|                              | 21   | 254              | DPL0777          | CGR5217   | 2.94  | 1.63  | 1.52  | 0.52  | 0.50  | -0.50 |
|                              | 26   | 82               | CGR6930          | SWU17241  | 5.06  | 4.45  | 0.39  | -0.86 | -0.25 | 0.25  |
| <i>t3</i>                    | 4    | 3                | NAU2701          | SWU18876  | 3.14  | 3.16  | 0.13  | 0.99  | -0.20 | 0.20  |
|                              | 7    | 67               | CGR5372          | SWU10205  | 2.82  | 2.76  | 0.29  | -0.92 | 0.30  | -0.30 |
|                              | 19   | 7                | Gh616            | CIR139    | 7.60  | 3.52  | 3.16  | 1.05  | 1.00  | -1.00 |
|                              | 20   | 63               | SWU20246         | SWU20501a | 2.54  | 2.45  | 0.00  | -0.87 | 0.01  | -0.01 |
|                              | 20   | 90               | CER0167          | SWU20064  | 3.57  | 3.29  | 0.01  | -1.01 | 0.04  | -0.04 |
|                              | 21   | 254              | DPL0777          | CGR5217   | 2.98  | 0.76  | 1.77  | 0.48  | 0.74  | -0.74 |
| <i>t4</i>                    | 26   | 82               | CGR6930          | SWU17241  | 5.27  | 5.23  | 0.01  | -1.27 | -0.05 | 0.05  |
|                              | 4    | 2                | SWU18881         | NAU2701   | 4.50  | 5.06  | 0.68  | 1.36  | -0.50 | 0.50  |
|                              | 5    | 155              | SWU13378         | SWU17846  | 2.71  | 2.39  | 0.00  | 0.94  | 0.02  | -0.02 |
|                              | 19   | 6                | NAU5330          | Gh72      | 4.98  | 4.02  | 0.09  | 1.22  | 0.18  | -0.18 |
|                              | 21   | 254              | DPL0777          | CGR5217   | 3.96  | 0.72  | 1.91  | 0.51  | 0.83  | -0.83 |
|                              | 25   | 0                | HAU1382          | SWU19848  | 2.50  | 0.58  | 2.84  | 0.46  | -1.02 | 1.02  |
| <i>t5</i>                    | 4    | 3                | NAU2701          | SWU18876  | 4.75  | 5.28  | 0.77  | 1.49  | -0.57 | 0.57  |
|                              | 5    | 155              | SWU13378         | SWU17846  | 4.38  | 3.44  | 0.02  | 1.21  | 0.10  | -0.10 |
|                              | 14   | 58               | NAU3308          | HAU1057   | 2.51  | 0.06  | 1.60  | -0.16 | -0.82 | 0.82  |
|                              | 20   | 25               | CGR6154          | SWU20246  | 2.97  | 0.54  | 1.09  | -0.48 | -0.68 | 0.68  |
|                              | 21   | 252              | DPL0777          | CGR5217   | 3.83  | 0.69  | 1.52  | 0.54  | 0.80  | -0.80 |
|                              | 25   | 1                | HAU1382          | SWU19848  | 2.76  | 0.27  | 2.82  | 0.34  | -1.09 | 1.09  |
| BCVF <sub>1</sub> population |      |                  |                  |           |       |       |       |       |       |       |
| <i>t1</i>                    | 4    | 58               | SWU16783         | SWU18876  | 4.18  | 4.10  | 1.17  | 0.40  | 0.21  | -0.21 |
|                              | 23   | 204              | DC40286          | PGML1434  | 4.36  | 0.15  | 4.42  | -0.08 | -0.42 | 0.42  |
| <i>t2</i>                    | 13   | 23               | SWU13032         | HAU2850   | 2.53  | 2.65  | 0.04  | -0.49 | -0.06 | 0.06  |

| Trait     | Chr. | Position<br>(cM) | Flanking markers |          | LOD  | V(A) | V(AE) | A     | AE1   | AE2   |
|-----------|------|------------------|------------------|----------|------|------|-------|-------|-------|-------|
|           | 15   | 11               | NAU3736          | SWU11691 | 3.33 | 3.44 | 0.01  | 0.56  | -0.03 | 0.03  |
|           | 23   | 202              | DC40286          | PGML1434 | 8.16 | 0.64 | 8.99  | -0.25 | -0.92 | 0.92  |
| <i>t3</i> | 13   | 25               | SWU13032         | HAU2850  | 2.92 | 3.23 | 0.00  | -0.75 | 0.01  | -0.01 |
|           | 15   | 11               | NAU3736          | SWU11691 | 2.59 | 2.97 | 0.02  | 0.72  | -0.06 | 0.06  |
|           | 23   | 201              | DC40286          | PGML1434 | 3.42 | 0.35 | 4.02  | -0.25 | -0.84 | 0.84  |
| <i>t4</i> | 21   | 108              | PGML2500         | CGR6521  | 2.96 | 3.01 | 0.09  | -0.81 | -0.14 | 0.14  |
|           | 23   | 202              | DC40286          | PGML1434 | 3.37 | 0.12 | 3.27  | -0.16 | -0.84 | 0.84  |
|           | 26   | 28               | CGR6477          | PGML2562 | 4.24 | 3.70 | 0.54  | -0.90 | 0.34  | -0.34 |
|           | 28   | 1                | BNL3545          | PGML3983 | 3.55 | 2.11 | 1.48  | -0.67 | 0.56  | -0.56 |
|           | 37   | 38               | JESPR154         | BNL5602  | 3.21 | 1.29 | 2.33  | -0.53 | -0.71 | 0.71  |
| <i>t5</i> | 13   | 29               | SWU13032         | HAU2850  | 3.11 | 2.95 | 0.01  | -0.91 | 0.05  | -0.05 |
|           | 23   | 204              | DC40286          | PGML1434 | 3.39 | 1.49 | 2.31  | -0.65 | -0.81 | 0.81  |
|           | 26   | 27               | CGR6477          | PGML2562 | 3.80 | 3.63 | 0.33  | -1.02 | 0.31  | -0.31 |
|           | 28   | 1                | BNL3545          | PGML3983 | 2.51 | 2.18 | 0.30  | -0.78 | 0.29  | -0.29 |
|           | 31   | 123              | SWU16721         | SWU16680 | 2.64 | 2.08 | 0.40  | 0.77  | -0.34 | 0.34  |
|           | 34   | 5                | JESPR297         | ICR00647 | 3.30 | 2.28 | 1.61  | 0.80  | 0.67  | -0.67 |
|           | 37   | 36               | JESPR154         | BNL5602  | 3.90 | 1.34 | 3.16  | -0.61 | -0.94 | 0.94  |

See footnotes of supplementary table S1 for explanations
