# Supplementary material for: Main Effect QTL with Dominance Determines Heterosis for Dynamic Plant Height in Upland Cotton
Source: Oxford University Press journal article supplement (doi:10.1534/g3.116.034355), 2016-10-01
Supplement: 034355_tables6.pdf [file 034355_tables6.pdf]

Table S6 Epistatic effects and environmental interactions detected for plant height in RIL and RILV populations using two-locus analysis by inclusive composite interval mapping

| Stage           | Chi | Flanking markers |          | Chj | Flanking markers |          | LOD  | V(AA) | V(AAE) | AA    | AAE1  | AAE2  |
|-----------------|-----|------------------|----------|-----|------------------|----------|------|-------|--------|-------|-------|-------|
| RIL population  |     |                  |          |     |                  |          |      |       |        |       |       |       |
| <i>t1</i>       | 6   | ICR00143         | CGR5108  | 9   | SWU15511         | SWU15413 | 5.33 | 2.72  | 1.07   | 0.61  | 0.38  | -0.38 |
|                 | 9   | Gh111            | Gh27     | 14  | ICR12037         | CGR5675  | 5.92 | 3.12  | 1.39   | -0.65 | -0.43 | 0.43  |
|                 | 14  | BNL3661          | PGML249  | 19  | NAU5330          | Gh72     | 5.40 | 3.03  | 1.43   | -0.64 | -0.44 | 0.44  |
|                 | 7   | PGML1916         | SWU1086  | 19  | SWU17782         | DPL0056  | 5.83 | 1.85  | 1.97   | 0.55  | 0.56  | -0.56 |
|                 | 9   | HAU1618          | NAU2873  | 22  | SWU21635         | SWU21646 | 5.15 | 2.77  | 1.05   | 0.62  | 0.38  | -0.38 |
|                 | 14  | ICR12037         | CGR5675  | 22  | SWU21646         | SWU21585 | 5.59 | 2.24  | 1.62   | 0.55  | 0.47  | -0.47 |
|                 | 18  | Gh60             | SWU2228  | 22  | SWU21533         | DPL0562  | 5.05 | 1.40  | 2.38   | 0.44  | 0.57  | -0.57 |
|                 | 18  | DC40150          | ICR02849 | 24  | SWU13267         | BNL1521  | 5.29 | 1.61  | 1.66   | -0.50 | -0.50 | 0.50  |
|                 | 9   | Gh158            | DC40407  | 26  | BNL598           | PGML163  | 5.97 | 1.62  | 2.93   | -0.47 | -0.63 | 0.63  |
|                 | 29  | DC20127          | DPL0252  | 32  | NAU2140          | NAU2957  | 5.81 | 2.22  | 2.14   | 0.56  | 0.54  | -0.54 |
| <i>t2</i>       | 14  | ICR12037         | CGR5675  | 22  | SWU21646         | SWU21585 | 5.54 | 2.39  | 1.51   | 0.87  | 0.69  | -0.69 |
|                 | 18  | Gh60             | SWU2228  | 22  | SWU21533         | DPL0562  | 5.02 | 1.67  | 2.05   | 0.75  | 0.82  | -0.82 |
|                 | 14  | TMB0071          | BNL3661  | 26  | SWU18681         | SWU0598  | 5.61 | 2.87  | 1.19   | 0.96  | 0.62  | -0.62 |
|                 | 21  | HAU0423          | CGR5806  | 27  | SWU11384         | ICR11885 | 6.24 | 2.71  | 1.55   | -0.96 | -0.72 | 0.72  |
|                 | 29  | DPL0252          | BNL3261  | 32  | NAU2140          | NAU2957  | 5.16 | 1.32  | 2.32   | 0.66  | 0.87  | -0.87 |
| <i>t3</i>       | 13  | DPL0535          | CER0165  | 25  | SWU19129         | PGML285  | 6.02 | 2.42  | 2.47   | -1.08 | -1.17 | 1.17  |
|                 | 14  | TMB0071          | BNL3661  | 26  | SWU18681         | SWU0598  | 5.41 | 3.00  | 1.04   | 1.25  | 0.74  | -0.74 |
| <i>t4</i>       | 1   | NAU6367          | MUSS422  | 10  | NAU2139          | SWU20689 | 5.33 | 1.09  | 3.42   | -0.84 | -1.51 | 1.51  |
|                 | 1   | SWU0077          | HAU1417  | 11  | NAU3695          | DPL0050b | 7.38 | 4.74  | 1.69   | -1.76 | -1.05 | 1.05  |
|                 | 16  | SWU10627         | PGML130  | 30  | BNL243           | CER0168  | 5.51 | 1.97  | 2.95   | 1.13  | 1.38  | -1.38 |
| <i>t5</i>       | 23  | SWU14807         | PGML418  | 25  | BNL3594          | DPL0282  | 5.03 | 3.43  | 0.96   | -1.64 | 0.88  | -0.88 |
| RILV population |     |                  |          |     |                  |          |      |       |        |       |       |       |
| <i>t1</i>       | 1   | ICR03724         | SWU1163  | 5   | Gh260            | PGML012  | 5.20 | 1.84  | 1.76   | 0.36  | 0.35  | -0.35 |
|                 | 16  | HAU3081          | NAU747   | 23  | DC40286          | PGML143  | 5.66 | 3.86  | 0.34   | 0.50  | -0.13 | 0.13  |
| <i>t2</i>       | 1   | SWU11632         | SWU2195  | 11  | CGR5421          | MUSS278  | 5.63 | 4.97  | 0.08   | 0.87  | 0.13  | -0.13 |
| <i>t5</i>       | 2   | DPL0200          | SWU1188  | 16  | HAU1129          | C2_0011B | 5.15 | 4.40  | 0.10   | 1.54  | -0.23 | 0.23  |
|                 | 13  | NAU3398          | CGR5331  | 30  | TMB1638          | CGR6812  | 5.34 | 4.19  | 0.03   | -1.50 | -0.13 | 0.13  |

Chi and Chj represent the linkage group number of the loci being tested in the analysis

AA is the epistatic effect between loci i and j

AAE is the effect of the environmental interaction of epistasis

V(AA)% and V(AAE)%, percentage of the total variation explained by the AA and AAE
