# Supplementary material for: Main Effect QTL with Dominance Determines Heterosis for Dynamic Plant Height in Upland Cotton
Source: Oxford University Press journal article supplement (doi:10.1534/g3.116.034355), 2016-10-01
Supplement: 034355_tables7.pdf [file 034355_tables7.pdf]

Table S7 Epistatic effects and environmental interactions detected for plant height in BCF<sub>1</sub> and BCVF<sub>1</sub> populations using two-locus analysis by inclusive composite interval mapping

| Stage                        | Chi | Flanking markers |         | Chj | Flanking markers |          | LOD  | V(AA) | V(AAE) | AA    | AAE1  | AAE2  |
|------------------------------|-----|------------------|---------|-----|------------------|----------|------|-------|--------|-------|-------|-------|
| BCF <sub>1</sub> population  |     |                  |         |     |                  |          |      |       |        |       |       |       |
| <i>t1</i>                    | 3   | SWU12783         | SWU1281 | 3   | SWU12765         | NAU3839  | 5.38 | 3.61  | 0.24   | 0.58  | 0.12  | -0.12 |
|                              | 13  | SWU22309         | SWU2232 | 24  | BNL1521          | HAU2504  | 5.08 | 2.94  | 0.84   | -0.48 | -0.26 | 0.26  |
|                              | 6   | HAU1460          | HAU1371 | 26  | BNL598           | PGML163  | 5.04 | 1.79  | 1.89   | -0.37 | -0.38 | 0.38  |
| <i>t3</i>                    | 5   | HAU1603          | PGML445 | 9   | CGR6876          | CGR5758  | 5.01 | 3.59  | 1.17   | -1.05 | 0.62  | -0.62 |
|                              | 6   | ICR10602         | SWU1965 | 30  | CER0168          | SWU21718 | 5.08 | 2.44  | 2.15   | -0.86 | 0.82  | -0.82 |
| <i>t4</i>                    | 1   | BNL2827a         | NAU6367 | 2   | SWU11976         | SWU11950 | 5.03 | 2.26  | 2.46   | 0.92  | -0.96 | 0.96  |
|                              | 11  | CAU0003          | DC40250 | 13  | DPL0535          | CER0165  | 5.04 | 2.71  | 2.07   | 1.00  | -0.88 | 0.88  |
|                              | 4   | SWU16783         | NAU3868 | 14  | PGML4763         | SWU13909 | 5.72 | 3.12  | 2.66   | 1.07  | -0.99 | 0.99  |
|                              | 11  | CAU0003          | DC40250 | 18  | DC40150          | ICR02849 | 5.34 | 2.89  | 2.23   | 1.04  | -0.92 | 0.92  |
|                              | 8   | HAU3177          | NAU4064 | 26  | DPL0491          | Gh64     | 5.02 | 3.05  | 1.98   | -1.05 | 0.85  | -0.85 |
|                              | 7   | SWU10064         | NAU3181 | 26  | SWU18681         | SWU0598  | 6.71 | 5.07  | 1.46   | -1.36 | 0.73  | -0.73 |
|                              | 16  | SWU10266         | DC40065 | 32  | NAU2140          | NAU2957  | 5.11 | 3.55  | 1.57   | 1.14  | -0.76 | 0.76  |
| <i>t5</i>                    | 4   | SWU16782         | SWU1678 | 7   | CGR5001          | CGR6586  | 5.34 | 4.07  | 1.41   | 1.30  | -0.78 | 0.78  |
|                              | 9   | HAU190           | HAU1618 | 23  | PGML4186         | NAU3100  | 5.53 | 1.96  | 4.07   | 0.91  | -1.31 | 1.31  |
|                              | 12  | NAU943           | DPL0303 | 25  | BNL3594          | DPL0282  | 5.49 | 3.79  | 1.80   | -1.28 | 0.88  | -0.88 |
|                              | 7   | SWU10064         | NAU3181 | 26  | SWU18681         | SWU0598  | 6.83 | 5.29  | 1.45   | -1.49 | 0.78  | -0.78 |
|                              | 10  | SWU20501         | CGR5873 | 29  | DC20127          | DPL0252  | 5.10 | 2.68  | 2.13   | -1.08 | 0.95  | -0.95 |
| BCVF <sub>1</sub> population |     |                  |         |     |                  |          |      |       |        |       |       |       |
| <i>t3</i>                    | 6   | BNL3650          | TMB2940 | 23  | CGR5158          | HAU1758  | 5.55 | 5.19  | 0.43   | 0.99  | 0.28  | -0.28 |
|                              | 23  | CGR5158          | HAU1758 | 23  | NAU2140          | DC40286  | 6.32 | 5.77  | 0.31   | 1.02  | 0.15  | -0.15 |
|                              | 20  | SWU20027         | Gh187   | 24  | HAU3076          | SWU13121 | 5.05 | 5.29  | 0.01   | -0.96 | -0.07 | 0.07  |
| <i>t4</i>                    | 17  | HAU1413          | CGR5576 | 26  | MGHES31          | HAU1571  | 5.13 | 3.71  | 0.92   | 0.91  | 0.46  | -0.46 |
|                              | 31  | CGR6772          | HAU0355 | 31  | SWU16780         | SWU16735 | 5.26 | 3.45  | 1.03   | 0.91  | 0.56  | -0.56 |
| <i>t5</i>                    | 36  | CGR5548          | SWU2070 | 38  | NAU2450          | PGML194  | 5.19 | 5.09  | 0.00   | -1.22 | 0.05  | -0.05 |

See footnotes of supplementary table S3 for explanations
