# Supplementary material for: Main Effect QTL with Dominance Determines Heterosis for Dynamic Plant Height in Upland Cotton
Source: G3 (Bethesda). 2016 Aug 26;6(10):3373–9. doi: 10.1534/g3.116.034355 (PMC5068956; doi:10.1534/g3.116.034355)
Supplement: Supplemental Material [file supp_g3.116.034355_TableS8.xls]

## Sheet: XZ genotype
RIL population	data type RI self
Num	177 653 0	1	2	3	4	5	6	7	8	9	10	11	12	13	14	15	16	17	18	19	20	21	22	23	24	25	26	27	28	29	30	31	32	33	34	35	36	37	38	39	40	41	42	43	44	45	46	47	48
1	*BNL1026	A	B	A	A	A	B	A	A	A	B	B	B	B	B	A	A	-	A	A	A	B	A	B	A	B	B	A	B	A	B	A	B	A	B	A	A	A	A	B	B	A	A	B	A	B	A	B	B
2	*BNL1053	B	B	B	B	B	A	-	A	A	B	A	A	B	A	A	B	A	A	B	A	B	B	A	B	A	B	A	B	B	A	A	A	B	B	A	A	B	B	A	B	A	B	B	A	B	B	B	A
3	*BNL1167	A	B	A	B	A	A	B	B	A	A	B	A	A	A	A	B	B	B	B	A	A	A	A	B	A	B	A	A	B	A	B	A	-	A	B	B	A	A	B	A	-	B	B	A	A	A	A	B
4	*BNL1317	A	B	-	B	B	B	B	B	A	A	B	A	A	A	B	B	B	A	B	A	A	A	A	A	A	B	B	B	A	B	B	A	A	B	A	A	B	B	B	B	A	A	B	B	B	B	B	B
5	*BNL1495	A	A	B	B	A	A	A	A	B	A	B	A	A	B	A	B	A	A	A	A	A	A	A	A	A	B	A	A	B	A	B	A	A	A	B	B	A	B	B	B	A	A	B	A	B	A	B	A
6	*BNL1521	A	A	B	A	B	A	A	A	A	B	B	A	B	A	A	B	A	B	B	A	B	B	-	B	A	A	B	A	A	B	A	A	A	B	A	A	B	-	B	A	A	A	A	A	B	B	A	B
7	*BNL1552	A	B	A	A	B	B	A	B	B	A	B	B	B	A	A	B	B	A	B	A	A	B	B	A	A	B	B	B	B	B	A	B	B	-	A	B	A	B	B	A	A	A	B	A	B	A	A	B
8	*BNL243	A	A	A	A	A	B	A	A	A	B	B	B	A	A	B	A	A	B	B	A	A	B	A	B	A	A	A	B	A	B	A	A	A	A	A	A	B	-	B	B	A	A	B	B	A	B	A	A
9	*BNL2449	A	A	B	B	A	B	B	A	B	A	A	B	A	B	A	B	B	A	A	A	B	A	A	A	A	B	A	A	B	A	B	A	B	A	B	B	A	B	B	A	A	A	B	B	B	A	B	-
10	*BNL2485	A	A	A	A	A	B	A	B	A	B	B	B	B	B	-	B	B	B	B	A	A	A	A	B	B	A	A	A	A	A	A	A	A	A	B	B	B	A	B	B	A	A	A	A	A	B	A	B
11	*BNL2495	A	B	B	B	A	A	B	B	B	B	B	A	A	B	A	A	A	A	B	B	A	B	B	B	A	A	A	A	A	B	B	B	B	B	A	B	B	B	A	B	A	A	A	A	A	A	A	-
12	*BNL2496	A	A	B	B	B	B	B	B	A	A	B	B	B	A	A	B	A	A	A	B	A	A	A	A	A	A	A	B	A	A	B	A	A	B	A	B	B	A	A	B	A	A	A	B	B	A	B	B
13	*BNL2827a	A	A	A	A	A	B	A	A	A	B	A	A	B	A	B	B	A	B	A	A	B	A	A	B	B	B	A	B	B	-	A	A	A	A	A	A	B	B	A	B	A	A	A	B	B	B	B	A
14	*BNL2827b	A	A	A	A	A	B	A	A	A	B	A	A	B	A	B	B	A	B	A	A	B	A	A	B	B	B	A	B	B	-	A	A	A	A	A	A	B	B	-	B	A	A	A	B	B	B	B	A
15	*BNL2877	A	A	B	B	A	B	B	A	A	A	A	A	B	B	B	A	A	A	B	A	B	A	A	A	A	A	B	B	B	A	A	A	A	A	B	B	B	A	B	B	B	A	A	A	B	A	B	B
16	*BNL2960	B	B	-	A	B	A	-	B	A	A	A	B	A	B	B	A	B	B	A	B	B	B	A	A	A	B	B	B	A	A	B	A	B	B	A	A	A	B	A	A	B	B	A	B	A	B	A	A
17	*BNL3171	B	A	-	A	A	A	A	B	A	B	A	B	A	A	A	B	A	A	B	B	B	B	A	A	A	A	A	B	A	A	A	A	B	B	B	B	B	A	A	B	A	A	B	A	B	A	A	-
18	*BNL3261	B	A	-	A	A	A	B	-	A	A	B	A	A	A	-	B	B	B	B	B	B	A	B	B	A	A	B	A	B	A	B	B	B	B	B	A	B	B	B	B	A	A	B	A	A	B	B	B
19	*BNL3442a	B	A	B	B	B	A	B	A	A	B	A	A	B	A	B	B	A	B	B	B	B	B	A	A	A	B	B	B	A	B	B	A	A	A	B	A	B	A	A	B	A	A	A	A	A	B	A	A
20	*BNL3442b	A	A	B	B	A	A	B	A	B	B	A	B	B	B	B	B	B	A	A	A	A	B	B	A	A	B	A	A	A	A	A	B	A	-	B	B	A	A	A	A	B	B	B	A	B	B	A	A
21	*BNL3594	B	B	A	B	A	B	B	B	A	A	B	B	A	B	A	B	B	B	A	B	A	A	A	B	B	A	A	B	A	B	A	A	B	B	-	A	B	B	A	B	A	A	A	-	B	A	B	B
22	*BNL3650	A	A	-	A	B	B	-	A	B	A	A	B	B	A	B	B	B	A	B	A	A	A	A	A	A	A	A	B	B	B	B	A	A	B	B	A	B	B	B	B	A	A	B	A	A	B	A	B
23	*BNL3661	A	A	A	A	A	A	A	A	A	A	A	A	A	B	A	A	A	A	B	A	B	B	B	A	A	B	A	A	B	B	B	B	A	B	A	B	B	A	A	B	B	B	A	B	B	B	B	-
24	*BNL3937	B	B	B	B	B	B	B	B	A	B	A	B	B	A	B	A	A	B	B	A	A	B	A	A	A	B	A	-	B	A	A	A	B	-	A	A	B	A	A	A	A	A	A	B	A	A	B	B
25	*BNL4028	B	B	A	A	B	B	A	A	B	A	B	A	A	A	A	A	B	B	-	A	A	A	A	B	A	B	B	A	B	A	B	A	A	B	A	B	A	A	B	B	A	A	B	A	A	A	B	A
26	*BNL4030	A	B	A	A	B	A	A	A	B	A	A	A	A	B	A	A	B	A	B	B	A	B	A	A	A	B	A	B	A	B	A	A	A	B	B	-	B	B	A	A	A	A	A	A	A	B	A	B
27	*BNL530	A	B	A	B	A	A	B	B	A	A	B	A	B	B	A	A	A	B	B	A	A	A	A	-	A	B	A	A	B	B	A	A	A	-	B	A	A	A	B	A	A	B	B	A	A	B	B	B
28	*BNL598	A	A	B	B	B	A	B	A	B	B	A	A	A	A	A	A	A	B	B	B	A	A	B	A	A	A	A	B	A	A	B	B	A	B	A	A	A	A	A	-	A	A	A	B	B	B	A	B
29	*C2-0011B	B	A	B	B	A	B	A	A	A	A	A	A	B	A	A	A	A	A	A	B	-	A	B	B	-	B	B	A	B	A	B	B	A	-	B	B	A	A	A	B	-	A	A	A	B	A	B	B
30	*C2-0115	B	A	-	A	A	A	-	B	A	B	A	A	A	A	B	B	B	B	B	B	B	A	B	B	A	B	B	A	B	A	B	B	B	A	B	B	B	A	B	B	A	A	B	A	A	B	B	B
31	*C2-0135	A	B	B	B	B	A	B	-	B	B	B	A	A	B	A	A	A	A	B	B	A	B	B	B	A	A	A	A	A	B	B	B	B	B	A	B	B	B	A	B	A	A	A	A	A	A	A	-
32	*CAU0003	B	B	B	A	A	A	A	A	A	A	A	A	B	B	A	B	A	A	A	A	A	A	B	B	A	A	B	B	B	A	A	B	B	B	A	B	B	A	A	A	A	A	A	A	B	A	A	A
33	*CAU0104	B	A	A	B	A	A	A	A	B	A	A	A	B	B	A	A	A	A	B	A	A	B	A	A	B	B	B	B	A	B	A	A	B	-	B	A	A	B	A	B	A	A	B	B	A	A	B	B
34	*CAU0161	A	A	A	A	B	A	A	A	B	A	A	A	A	A	A	A	B	A	B	B	A	B	A	A	A	B	A	B	A	B	A	A	A	-	B	A	B	B	A	A	A	A	A	A	A	B	A	B
35	*CER0028	A	B	-	A	A	B	A	B	B	B	B	A	A	A	A	B	B	A	A	A	A	B	B	B	A	A	B	A	A	A	A	B	B	B	B	A	B	A	B	B	A	B	A	B	B	B	A	A
36	*CER0036	B	A	B	A	A	B	A	A	B	A	A	B	A	A	B	A	B	B	A	B	B	A	A	B	A	B	A	A	A	B	B	A	A	A	-	A	B	A	A	B	A	B	B	A	A	A	A	B
37	*CER0042	B	B	B	B	A	B	B	B	A	B	A	B	B	A	B	A	A	B	B	A	A	B	A	A	A	B	A	A	B	A	A	A	B	A	A	A	B	A	A	A	A	A	A	B	A	A	B	B
38	*CER0098	A	A	A	A	B	A	A	B	B	A	B	B	B	B	A	A	A	B	A	B	B	B	A	B	A	A	B	B	A	B	A	A	A	B	A	A	B	A	B	B	-	A	A	A	A	A	B	A
39	*CER0144	A	A	A	A	B	A	A	B	B	B	B	A	A	B	A	A	A	A	B	B	A	A	B	B	A	B	A	A	B	B	A	B	A	B	-	B	A	B	A	B	B	B	A	B	B	A	A	B
40	*CER0165	A	A	B	B	B	A	A	A	B	A	A	A	A	B	A	B	B	A	A	A	B	A	A	A	A	B	A	A	B	A	B	A	B	A	B	B	A	B	B	B	A	A	B	A	B	A	B	B
41	*CER0167	B	A	A	A	B	B	A	B	B	A	A	B	B	A	B	B	B	A	B	A	B	A	A	A	A	A	-	B	B	A	A	A	B	A	B	A	B	A	A	B	A	A	B	A	B	B	A	A
42	*CER0168	A	A	A	A	A	A	A	A	A	B	B	B	A	A	B	A	A	B	B	A	A	B	A	B	A	A	A	B	A	B	A	A	A	A	A	A	B	B	B	B	A	A	B	B	A	A	A	A
43	*CGR5001	B	A	A	A	B	B	A	A	A	B	A	A	B	A	A	A	A	A	A	B	A	A	B	B	B	B	B	A	A	B	B	B	B	B	B	A	B	B	B	A	B	A	A	B	B	A	A	B
44	*CGR5009	B	A	B	B	B	A	B	A	A	A	B	A	A	A	B	B	B	B	B	A	A	A	B	A	A	B	A	B	B	B	B	B	B	A	A	A	A	B	B	A	A	A	B	B	A	A	B	B
45	*CGR5025	B	B	A	A	A	A	A	A	A	A	B	B	A	A	B	B	B	B	B	A	B	A	A	B	B	A	B	A	A	A	A	A	B	B	A	B	B	B	B	B	B	B	A	A	A	B	B	A
46	*CGR5056	A	A	-	B	B	B	B	A	A	A	A	A	A	A	A	A	A	A	A	A	A	B	B	A	B	B	B	B	B	A	B	B	B	B	A	A	A	B	A	A	B	B	A	A	A	B	A	B
47	*CGR5108	A	A	-	A	A	B	A	A	A	A	B	A	A	-	A	B	B	B	A	B	B	A	A	A	B	B	A	B	B	B	B	A	A	B	B	A	B	B	B	A	A	A	A	A	A	A	B	-
48	*CGR5111	B	A	-	A	A	A	-	B	A	B	B	A	A	A	B	B	B	B	B	B	B	A	B	B	A	B	B	A	B	A	B	B	B	-	B	B	B	A	B	B	A	A	B	A	A	B	B	-
49	*CGR5124	B	A	A	A	A	A	A	A	A	A	A	B	A	A	B	B	B	A	B	B	A	A	A	A	A	B	A	B	B	B	B	A	A	B	B	A	A	A	A	A	A	A	A	A	A	B	A	A
50	*CGR5202	B	A	B	A	B	B	A	A	B	B	B	B	B	A	A	A	B	B	A	A	B	B	A	A	B	B	A	B	B	B	A	A	B	B	A	A	B	A	B	A	B	B	B	B	B	B	A	B
51	*CGR5217	B	A	B	A	B	A	A	A	A	B	A	B	B	A	A	B	B	A	A	B	B	B	A	A	A	A	A	B	A	B	B	A	A	A	B	A	A	A	A	B	A	A	A	-	A	A	A	A
52	*CGR5331	A	A	B	B	B	A	B	A	B	B	A	B	A	B	B	A	B	A	B	A	A	A	B	A	B	B	A	A	B	A	A	B	B	A	B	A	B	A	B	B	A	A	A	B	B	A	B	B
53	*CGR5352	A	A	A	A	A	B	-	A	A	B	B	B	A	A	B	A	A	B	B	A	A	B	A	B	A	A	A	B	A	B	A	A	A	A	A	A	B	B	B	B	A	A	B	B	A	B	A	A
54	*CGR5355	-	A	B	A	B	B	A	A	B	A	A	B	B	A	B	B	B	A	B	A	A	A	A	A	A	A	A	B	B	B	B	A	A	B	B	B	B	B	B	B	A	A	A	A	A	B	A	B
55	*CGR5372	A	A	A	A	B	B	-	A	B	A	A	B	A	B	B	B	B	A	B	B	A	A	B	A	B	B	B	A	B	B	B	B	B	B	B	A	A	A	B	A	B	B	B	B	B	B	A	B
56	*CGR5390	A	A	A	A	A	A	-	A	B	A	B	B	A	B	B	A	B	A	A	A	A	A	B	B	A	B	A	B	A	A	B	B	A	A	B	B	B	B	B	B	A	A	B	A	A	B	B	A
57	*CGR5421	A	A	B	B	A	A	B	B	B	-	-	B	A	B	A	A	B	A	A	A	A	B	B	A	A	B	A	B	A	A	A	B	A	-	A	A	B	A	A	A	B	B	B	A	B	B	-	B
58	*CGR5423	A	A	B	B	A	B	B	A	A	B	B	A	A	A	B	A	A	A	B	B	B	B	A	B	A	B	B	-	B	A	A	A	A	B	A	B	A	B	A	B	B	B	-	-	A	B	B	B
59	*CGR5452	A	A	A	A	B	A	A	B	B	B	B	A	A	B	A	A	A	A	B	B	A	A	B	B	A	B	A	A	B	B	A	B	A	A	A	B	A	B	A	B	B	B	A	B	B	A	A	B
60	*CGR5534	A	A	B	B	A	B	B	A	A	A	A	A	B	B	B	A	B	A	A	A	B	A	A	A	A	A	B	B	A	A	A	A	A	A	B	B	B	A	B	B	B	A	A	A	B	A	B	B
61	*CGR5539	B	A	A	A	A	A	A	A	A	B	A	A	A	B	A	-	A	-	B	-	-	B	A	A	B	B	B	B	A	B	A	A	B	A	B	A	A	B	B	B	A	A	B	B	B	A	B	B
62	*CGR5548	B	B	B	B	A	B	B	B	A	B	A	B	A	B	A	B	A	A	A	A	A	B	B	A	B	B	B	A	A	B	B	B	B	B	B	A	A	B	A	B	B	A	A	B	B	B	B	B
63	*CGR5554	A	A	B	B	B	A	B	A	B	B	A	B	A	B	B	A	B	A	-	A	A	A	B	A	B	B	A	A	B	A	A	B	B	A	B	A	B	A	B	B	A	A	A	B	B	A	B	B
64	*CGR5576	B	B	B	B	A	B	B	B	B	A	A	A	A	A	A	A	A	A	A	B	A	B	B	A	A	B	A	B	A	B	A	B	A	A	B	A	B	A	A	A	A	A	B	B	B	B	A	B
65	*CGR5602	B	B	A	A	B	A	A	A	A	B	A	B	A	A	A	B	A	A	B	A	B	B	A	B	A	A	A	B	A	A	A	A	B	B	A	B	B	B	A	B	A	B	B	A	B	B	B	B
66	*CGR5663	A	A	A	A	A	A	A	A	A	B	B	B	A	A	B	A	B	B	A	A	B	A	B	B	B	B	A	B	B	B	A	B	A	B	A	A	A	A	B	A	B	B	B	B	B	B	B	A
67	*CGR5675	A	B	B	A	A	B	A	B	A	A	A	A	A	B	A	A	A	B	B	B	B	B	B	B	A	B	A	B	B	A	B	B	-	A	B	B	B	B	A	B	A	A	A	A	B	B	B	A
68	*CGR5758	B	B	A	B	B	B	B	B	A	A	B	A	A	A	B	B	B	A	B	A	A	A	A	A	A	B	B	B	B	B	B	A	A	B	A	A	B	B	B	B	B	B	B	-	B	A	A	B
69	*CGR5801	B	A	B	A	A	A	B	A	B	A	B	B	B	A	B	B	B	A	B	A	A	A	A	A	A	A	A	B	B	B	B	A	A	B	B	A	B	B	A	B	A	A	A	B	A	B	A	B
70	*CGR5806	B	A	B	A	A	A	A	B	A	B	A	B	A	A	A	B	A	A	B	B	B	B	A	A	A	A	A	B	A	A	A	-	B	B	B	B	B	A	A	B	A	A	B	A	B	A	A	B
71	*CGR5808	B	A	B	A	A	A	A	B	A	A	A	B	B	A	A	B	B	A	A	B	B	B	A	A	A	B	A	B	A	B	A	A	A	A	-	A	B	A	A	B	A	A	B	A	B	A	A	A
72	*CGR5867	A	B	A	B	B	B	B	B	A	A	B	A	A	A	B	B	B	A	B	A	A	A	A	A	A	B	B	B	A	B	B	A	A	B	A	A	B	B	B	B	A	A	B	B	B	B	-	-
73	*CGR5871	A	B	A	B	B	A	B	B	A	A	B	B	B	B	A	B	B	B	A	A	A	A	B	B	A	A	B	A	A	B	B	B	A	A	B	A	B	A	A	B	B	B	A	B	B	B	A	B
74	*CGR5873	A	B	A	A	A	A	A	B	A	A	A	B	A	B	A	B	B	A	B	B	B	B	A	A	A	B	B	B	B	A	B	A	B	A	A	A	A	B	B	B	B	B	A	A	B	B	A	B
75	*CGR5883	B	A	B	A	B	B	A	A	B	A	A	B	B	A	B	B	B	A	B	A	A	A	A	A	A	A	A	B	B	B	B	A	A	B	B	A	B	B	A	B	A	A	A	A	A	B	A	B
76	*CGR6017	B	B	A	A	A	B	A	B	B	B	A	A	A	B	B	A	A	B	A	B	A	B	B	A	A	B	A	A	A	B	A	B	B	B	B	A	B	A	A	A	A	A	B	B	B	B	B	B
77	*CGR6129	A	B	A	A	A	A	A	A	A	B	B	B	A	B	A	B	A	B	B	A	A	A	A	B	B	A	A	A	A	A	B	A	A	B	B	A	B	A	B	B	A	B	B	B	A	B	B	B
78	*CGR6154	B	B	A	B	A	A	-	B	A	A	A	B	B	B	A	B	A	B	B	A	B	A	B	A	B	B	B	A	A	B	B	B	B	B	B	A	A	B	A	B	B	B	B	A	B	A	A	B
79	*CGR6254	A	A	B	-	A	A	B	B	B	B	A	B	B	B	B	B	B	B	B	A	B	A	B	B	A	B	B	A	A	A	-	B	B	B	A	A	B	B	A	A	B	B	A	B	A	A	A	B
80	*CGR6356	A	A	B	B	B	B	B	A	A	A	A	B	A	A	B	A	A	A	A	A	A	B	B	A	B	B	B	A	A	A	B	B	B	B	A	A	B	B	A	A	B	B	A	B	A	B	A	B
81	*CGR6508	A	A	B	B	A	A	B	B	B	B	B	B	A	A	B	A	A	A	A	A	B	A	B	A	B	B	B	B	B	B	B	B	B	B	A	B	B	A	A	A	B	A	B	B	A	B	A	B
82	*CGR6525	B	A	B	A	A	A	A	B	B	B	A	A	B	B	A	A	B	A	-	A	A	B	B	B	A	A	A	A	A	A	B	B	A	B	A	B	A	A	A	A	A	B	B	A	B	A	A	B
83	*CGR6528	-	A	B	A	A	A	A	B	B	B	B	A	A	B	A	B	A	A	A	B	A	A	B	B	A	B	A	A	A	B	B	B	B	B	B	A	B	A	B	B	A	B	B	B	B	B	B	B
84	*CGR6580	B	B	-	A	A	A	A	A	A	A	A	A	B	B	A	B	A	A	A	B	A	A	B	B	A	A	A	B	B	A	A	B	A	B	A	B	B	A	A	A	-	A	A	A	B	B	A	B
85	*CGR6586	A	A	A	A	B	B	A	A	B	A	A	B	A	B	B	B	B	A	B	B	A	A	B	A	B	B	B	A	B	B	B	B	B	B	B	A	A	A	B	A	B	B	B	B	B	B	A	B
86	*CGR6683	B	A	B	B	B	B	B	A	B	A	A	A	A	A	A	A	B	A	B	B	B	B	B	A	B	B	A	B	B	B	B	B	B	B	A	B	B	A	A	B	A	B	A	A	A	B	B	B
87	*CGR6695	B	A	A	A	B	B	A	A	B	A	B	B	A	A	B	B	A	B	A	B	B	B	A	A	B	B	A	A	A	A	B	A	A	A	B	B	A	A	A	B	B	B	B	A	B	A	A	A
88	*CGR6732	A	A	B	B	A	B	A	A	B	A	A	B	A	B	A	B	B	A	A	A	B	A	A	A	A	B	A	A	B	A	B	A	B	A	B	B	A	B	B	A	A	A	B	A	B	A	B	A
89	*CGR6749	B	B	B	A	A	B	B	A	A	A	A	B	A	A	B	B	B	A	B	B	A	A	A	A	A	A	A	B	B	B	B	A	A	B	B	A	B	A	A	A	A	A	A	A	A	B	A	B
90	*CGR6771	B	A	B	B	B	A	B	A	A	A	B	A	A	A	B	B	B	B	B	A	A	A	B	A	A	B	A	B	B	B	B	B	B	A	A	A	A	B	B	A	A	A	B	B	A	A	B	B
91	*CGR6784	B	B	B	B	B	B	B	A	B	A	A	A	B	A	A	A	B	A	B	A	B	B	B	B	B	B	A	B	B	B	B	B	B	B	A	B	B	A	A	B	A	B	A	B	A	B	B	B
92	*CGR6802	B	-	B	B	B	B	B	A	A	A	B	A	A	B	B	A	B	A	A	B	B	A	B	B	A	B	A	A	B	A	B	B	A	A	B	B	A	A	A	B	B	A	A	-	B	A	B	B
93	*CGR6812	A	A	A	A	A	A	A	A	A	B	B	B	A	A	B	A	A	B	B	A	A	B	A	B	A	A	A	B	A	-	-	A	A	A	A	B	B	B	B	B	A	A	B	B	A	A	A	A
94	*CGR6857	A	A	B	B	B	B	B	A	A	A	A	A	A	A	A	A	A	A	A	A	A	B	B	A	B	B	B	A	A	A	B	B	B	B	A	A	B	B	A	A	B	B	A	A	A	B	A	B
95	*CGR6864	B	B	A	B	A	A	B	B	B	B	B	B	A	B	A	B	B	B	B	B	A	A	A	B	A	A	A	B	A	B	A	A	A	B	A	A	B	B	A	B	A	A	A	B	A	A	B	-
96	*CGR6876	B	B	-	B	B	B	B	B	A	A	B	A	A	A	B	B	B	A	B	A	A	A	A	A	A	B	B	B	A	B	B	A	A	-	A	A	-	B	B	B	B	B	B	B	B	A	A	A
97	*CGR6880	A	A	A	A	B	A	A	B	B	B	B	A	A	B	A	A	A	A	B	B	A	A	B	B	A	B	A	A	B	B	A	B	A	A	A	B	A	B	A	B	B	B	A	B	B	A	A	B
98	*CGR6889	A	B	A	A	B	A	A	A	B	A	B	B	B	A	A	B	A	B	A	B	B	A	A	A	B	B	A	B	B	B	B	A	B	B	A	A	A	B	B	A	A	A	B	A	B	B	B	B
99	*CGR6930	A	A	A	A	B	A	A	B	B	B	B	A	A	B	A	A	A	A	B	B	A	A	B	B	A	B	A	A	B	B	A	B	A	-	A	B	A	B	A	B	B	B	A	B	B	A	A	B
100	*CIR099	A	A	A	A	A	B	A	A	B	A	A	A	B	A	A	B	A	B	A	A	B	A	B	A	B	A	B	A	B	B	B	B	A	-	B	B	B	A	A	A	B	B	A	A	-	A	A	B
101	*CIR139	A	B	A	A	B	B	A	A	A	A	A	A	B	A	A	A	B	B	B	A	A	B	B	B	A	A	A	B	A	A	A	B	A	B	A	B	B	A	B	A	A	A	A	B	A	A	A	A
102	*CIR216	B	B	-	B	B	A	-	A	A	A	B	B	B	A	A	B	A	A	B	B	A	A	B	B	A	B	B	B	A	B	B	B	A	B	A	B	A	B	A	B	B	B	A	A	B	A	B	A
103	*CIR228	A	A	A	A	A	B	A	B	A	B	B	A	B	B	A	B	B	B	B	A	B	A	A	B	B	A	B	A	A	A	A	A	A	A	B	B	B	A	B	B	A	A	A	B	B	B	A	B
104	*CIR307	A	B	A	A	B	A	A	A	B	A	B	B	B	A	A	B	A	B	A	B	B	A	A	A	B	B	-	B	B	B	B	A	B	B	A	A	A	B	B	A	A	A	B	A	B	B	B	-
105	*CIR334	A	B	A	A	B	A	A	A	B	A	B	B	B	A	A	B	A	B	A	B	B	A	A	A	B	B	A	B	B	B	B	A	B	B	A	A	A	B	B	A	A	A	B	A	B	B	B	B
106	*COT059	A	B	A	A	B	A	A	A	B	A	B	B	B	A	A	B	A	B	A	B	B	A	A	A	B	B	A	B	B	B	B	A	B	B	A	A	A	B	B	A	A	A	B	A	B	B	B	B
107	*COT064	A	A	B	B	B	B	-	B	A	A	B	B	B	B	A	B	B	B	A	B	A	B	B	A	B	A	A	A	B	B	A	B	B	A	B	B	A	A	A	A	A	A	A	A	A	A	B	A
108	*COT107	A	A	A	B	A	A	B	A	B	B	B	A	A	B	A	A	B	A	B	B	A	A	A	A	B	A	A	A	B	B	B	A	B	B	A	B	B	B	A	B	B	B	A	A	B	B	B	B
109	*DC20046	A	A	B	B	B	B	-	A	A	A	A	A	A	A	A	A	A	A	A	A	A	B	B	A	B	B	B	B	B	A	B	-	B	A	A	A	A	B	A	A	B	B	A	A	A	B	A	B
110	*DC20094	A	A	-	B	B	A	B	B	A	A	A	B	A	B	A	A	A	A	A	A	B	A	B	B	B	B	A	B	B	A	B	B	B	B	B	B	B	A	A	B	B	B	B	B	B	B	A	B
111	*DC20124	B	A	B	B	A	B	B	A	A	A	A	A	B	A	A	A	A	A	A	B	B	A	B	B	A	B	B	A	B	A	B	B	A	B	B	B	A	A	A	B	B	B	A	A	B	A	B	B
112	*DC20127	B	A	A	A	A	A	A	B	A	B	A	A	A	A	B	A	B	B	A	A	A	A	A	A	A	B	A	B	B	B	B	A	B	B	B	A	A	B	B	B	A	A	A	A	A	A	B	B
113	*DC30107	A	B	B	-	B	-	-	-	B	B	B	A	A	B	A	A	A	A	B	B	A	B	B	B	A	A	A	A	A	B	B	B	B	B	A	B	B	B	A	B	A	A	A	A	A	A	A	A
114	*DC40052	A	A	B	B	B	B	-	A	A	A	A	A	A	A	A	A	A	A	A	A	A	B	B	A	B	B	B	B	B	A	B	B	B	B	A	A	A	B	A	A	B	B	A	A	A	B	A	B
115	*DC40065	B	A	B	B	A	B	-	A	A	A	A	A	B	A	A	A	A	A	A	B	B	A	B	B	A	B	B	A	B	A	B	B	A	B	B	B	A	A	A	B	B	A	A	A	B	A	B	B
116	*DC40122	A	B	A	A	B	B	A	A	A	A	A	A	B	A	A	A	B	B	B	A	A	B	B	B	A	A	A	B	A	A	A	B	A	B	A	B	B	A	B	A	A	A	A	B	A	A	A	-
117	*DC40150	A	B	B	B	B	B	B	A	B	B	A	B	B	B	A	B	B	B	A	A	B	A	B	A	A	B	B	A	B	B	B	B	B	B	B	B	B	B	B	B	B	A	B	A	B	A	A	A
118	*DC40175	A	B	A	A	A	A	A	A	B	A	B	A	B	A	B	B	A	B	A	B	B	A	A	A	B	B	B	B	B	B	B	A	A	B	A	A	A	B	B	A	A	A	B	A	B	B	B	B
119	*DC40183	A	B	A	A	A	A	B	A	B	A	B	A	B	A	B	B	A	B	A	B	B	A	A	A	B	B	B	B	B	B	B	A	A	B	A	A	A	B	B	A	A	A	B	A	B	B	B	B
120	*DC40250	B	B	-	A	A	A	A	A	A	A	-	A	B	B	A	B	A	A	A	A	A	A	B	B	A	A	A	B	B	A	A	B	B	B	A	B	B	A	A	A	A	A	A	A	B	A	A	B
121	*DC40407	A	B	B	B	A	A	B	B	A	A	A	A	B	A	B	B	B	A	B	B	B	B	A	A	B	B	B	B	A	A	A	A	A	A	A	B	A	A	B	B	B	B	B	B	B	A	B	A
122	*DC40417	B	A	-	A	B	B	A	A	B	A	A	B	B	A	B	B	B	A	B	A	A	A	A	A	A	A	A	B	B	B	B	A	A	B	B	B	B	B	A	B	A	A	A	A	A	B	A	B
123	*DPL0003	-	-	-	-	-	-	-	-	-	A	A	B	A	A	B	A	A	A	A	A	A	B	B	A	B	A	B	A	A	A	B	B	A	B	A	A	B	B	A	A	B	B	B	B	A	B	A	B
124	*DPL0022	B	B	A	A	A	A	B	B	A	A	B	B	A	A	B	B	B	B	B	A	B	A	A	B	B	A	B	A	A	A	A	A	B	B	A	B	B	B	B	B	B	B	A	A	A	B	B	B
125	*DPL0048	A	B	A	A	A	B	A	-	A	B	B	B	B	B	A	A	A	A	A	A	B	A	B	A	B	B	A	B	A	B	A	B	A	B	A	A	A	A	B	B	A	A	B	A	B	A	B	B
126	*DPL0050a	B	B	A	A	A	A	A	B	A	B	A	B	A	A	A	B	A	A	B	B	B	B	A	-	A	A	A	B	A	A	A	A	B	B	B	B	B	A	A	B	A	A	B	A	B	A	A	A
127	*DPL0050b	B	A	B	A	A	A	A	A	A	A	A	A	B	B	A	B	B	A	A	A	A	A	B	-	A	A	A	B	B	A	A	B	B	B	A	A	B	A	A	A	A	A	A	A	B	B	A	B
128	*DPL0056	B	A	B	B	A	A	B	A	B	A	A	A	B	B	A	A	A	A	B	A	A	B	A	A	B	B	B	B	A	B	A	-	B	B	B	A	B	B	A	B	A	A	B	B	A	A	B	B
129	*DPL0057	A	A	B	A	A	A	A	B	B	B	A	B	B	B	B	A	B	A	B	A	B	A	B	B	A	B	B	A	A	A	A	B	B	B	A	A	B	B	A	A	B	B	A	B	A	A	A	B
130	*DPL0070	A	B	B	B	B	A	B	B	B	B	B	A	A	B	A	A	A	A	B	B	A	B	B	B	A	A	A	A	A	B	B	B	-	B	A	B	B	B	A	B	A	A	A	A	A	A	A	-
131	*DPL0090	A	B	A	A	B	A	-	A	A	B	-	B	A	B	A	B	A	B	B	A	A	A	B	B	B	A	A	A	A	A	B	B	A	B	B	A	B	A	B	B	A	B	B	B	A	B	A	B
132	*DPL0131	B	A	B	B	B	A	B	A	A	B	A	A	B	A	B	B	B	B	B	B	B	B	A	A	A	B	B	B	A	B	B	A	A	A	B	A	B	A	A	B	A	A	A	A	A	B	A	B
133	*DPL0152a	A	A	A	A	B	A	A	A	B	B	A	B	A	A	B	A	A	A	B	A	B	B	B	B	A	B	B	B	A	B	A	B	A	A	B	B	A	B	A	B	A	A	B	B	A	B	B	B
134	*DPL0152b	A	A	B	B	A	B	B	A	A	B	B	A	A	A	B	A	A	A	B	B	B	B	A	B	A	B	B	A	B	A	A	A	A	B	A	B	A	B	A	B	B	B	A	A	B	B	B	B
135	*DPL0182	A	B	A	A	-	A	A	-	B	A	B	B	B	A	A	B	A	B	A	B	B	A	A	B	B	B	A	-	B	B	B	A	B	B	A	A	A	B	B	A	A	A	B	A	B	B	B	B
136	*DPL0217	B	A	B	A	B	B	A	A	B	A	B	B	A	A	B	B	A	B	A	B	B	B	A	A	B	B	A	A	A	A	B	A	A	A	B	B	A	A	A	B	B	B	B	A	B	A	A	A
137	*DPL0244	B	A	B	A	B	B	A	A	-	A	A	-	B	A	B	B	B	A	B	A	A	A	A	A	A	A	A	B	B	B	B	A	A	B	B	A	B	B	A	B	A	A	A	A	A	B	A	B
138	*DPL0252	B	A	A	A	A	A	B	-	A	B	B	A	A	A	B	A	B	B	B	A	A	A	A	A	A	B	B	A	B	B	B	A	B	B	B	A	B	B	B	B	A	A	A	A	A	A	B	A
139	*DPL0282	A	A	B	A	B	A	A	B	A	A	A	A	A	B	A	B	B	B	A	A	B	B	A	A	A	A	-	A	A	B	A	B	B	B	B	B	B	A	-	A	A	A	A	A	B	A	A	B
140	*DPL0303	A	A	A	B	A	A	B	A	B	B	B	A	A	B	A	A	B	A	B	B	A	A	A	A	B	A	A	-	B	B	B	A	B	B	A	A	B	B	A	B	B	B	A	A	B	B	B	B
141	*DPL0308	A	-	B	B	B	B	B	A	B	A	A	A	A	B	A	B	B	A	A	A	-	A	A	A	A	B	A	A	B	A	A	A	B	A	B	B	A	B	B	A	A	A	B	A	-	A	A	B
142	*DPL0319	A	A	A	A	B	-	-	A	A	B	A	B	A	A	-	A	B	B	A	-	B	B	A	B	B	B	A	B	A	B	A	A	A	A	A	A	A	A	A	A	A	A	-	A	A	A	A	A
143	*DPL0491	A	B	A	A	B	A	A	B	B	B	B	A	A	B	A	A	A	A	B	A	A	B	B	A	A	B	A	A	B	B	A	A	B	A	A	B	B	B	A	B	B	B	A	A	A	A	A	B
144	*DPL0502	A	A	A	A	A	B	A	B	A	B	B	A	B	B	A	B	B	B	B	A	B	A	A	B	B	A	B	A	A	A	A	A	A	B	B	B	B	A	B	B	A	A	A	B	B	B	A	B
145	*DPL0535	A	A	B	B	B	B	A	A	B	A	A	A	A	B	A	B	B	A	A	A	B	A	A	A	A	B	A	A	B	A	B	A	B	A	B	B	A	B	B	B	A	A	B	A	B	B	B	B
146	*DPL0562	B	B	A	B	A	A	A	A	A	B	A	A	A	A	A	A	A	B	B	A	B	A	B	B	A	A	A	A	A	B	A	A	B	A	B	B	B	A	A	A	A	A	B	B	A	A	A	A
147	*DPL0565	A	A	A	B	B	B	B	A	A	A	A	A	A	B	A	A	B	A	B	A	B	B	B	A	B	B	B	B	A	B	B	B	B	A	B	B	B	A	B	B	A	A	A	A	A	A	B	B
148	*DPL0572	A	A	B	B	A	B	B	A	B	A	A	B	A	B	A	B	B	A	A	A	B	A	A	A	A	B	A	A	B	A	B	A	B	A	B	B	A	B	B	A	A	A	B	B	B	A	B	B
149	*DPL0590	B	A	A	A	A	A	-	A	A	A	A	B	A	A	B	B	B	A	B	B	A	A	A	A	A	B	A	B	B	B	B	A	A	B	B	A	A	A	A	A	A	A	A	A	A	B	A	B
150	*DPL0707	A	B	A	B	A	B	B	B	B	A	B	A	A	A	A	A	B	A	A	B	B	B	A	A	A	B	B	B	B	A	B	A	B	B	B	A	A	B	B	B	B	B	A	A	B	B	B	A
151	*DPL0732	A	A	A	B	A	A	B	A	B	B	B	A	A	B	A	A	B	A	B	B	A	A	A	A	B	A	A	A	B	B	B	A	B	A	A	B	B	B	A	B	B	B	A	A	B	B	B	B
152	*DPL0752	A	A	B	B	B	B	B	A	A	A	A	A	A	A	A	A	A	A	A	A	A	B	B	A	B	B	B	B	B	A	B	B	B	B	A	A	A	B	A	A	B	B	A	A	A	B	A	B
153	*DPL0777	B	A	A	A	A	A	A	A	A	B	A	B	B	A	A	B	B	A	A	A	B	B	A	A	A	B	A	B	A	B	A	A	A	A	B	A	A	A	A	B	A	A	A	A	A	A	A	-
154	*DPL0790	A	B	A	A	A	A	A	B	A	B	B	B	A	B	A	B	A	B	B	B	B	A	B	B	B	A	A	A	B	A	B	B	A	B	B	A	B	A	B	B	A	A	B	B	A	B	B	-
155	*DPL0847a	A	A	B	B	B	B	B	A	A	A	A	A	A	A	A	A	A	A	A	A	A	B	B	A	B	B	B	B	B	A	B	B	B	B	A	A	A	B	A	A	B	B	A	A	A	B	A	B
156	*DPL0847b	B	B	-	A	A	B	-	A	A	A	A	B	A	A	B	B	B	A	B	B	A	A	A	A	A	B	A	B	B	B	B	A	A	B	B	A	B	A	A	A	A	A	A	A	A	B	A	B
157	*DPL0864	A	B	A	A	A	B	A	A	B	B	A	B	B	A	A	A	A	B	A	A	B	A	B	A	A	B	B	A	B	B	B	B	A	B	B	A	B	B	A	B	B	A	B	A	A	A	A	A
158	*DPL0883	A	A	B	B	B	B	-	B	A	A	B	B	B	B	A	B	B	B	A	B	A	B	B	A	B	A	A	A	B	B	A	B	B	A	B	B	A	A	A	B	A	A	A	A	A	A	B	A
159	*DPL0894	A	A	A	A	A	A	-	A	B	A	B	B	A	B	B	A	B	A	A	A	A	A	B	B	A	B	A	B	A	A	B	-	A	A	B	B	B	B	B	B	A	A	B	A	A	B	B	A
160	*DPL0897	A	B	A	A	A	B	A	A	A	B	B	B	B	B	B	A	A	A	A	A	B	A	B	B	B	B	A	B	A	B	A	B	A	B	A	A	A	A	B	B	B	A	B	A	B	A	B	B
161	*Gh111	A	A	A	B	A	B	B	B	B	B	A	A	B	A	B	B	B	B	B	A	A	B	B	B	A	A	A	B	B	B	B	B	B	B	B	B	A	A	A	A	B	B	B	A	A	A	A	B
162	*Gh120	A	A	A	B	B	B	A	A	A	A	A	A	A	B	A	A	B	A	B	A	B	B	B	A	B	B	A	B	A	B	B	B	B	A	B	B	B	A	B	B	A	A	A	A	A	A	B	B
163	*Gh137	A	B	A	A	A	B	-	A	A	B	B	B	B	B	B	A	A	A	A	A	B	A	B	B	B	B	A	B	A	B	A	B	A	B	A	A	A	A	B	B	B	A	B	A	B	A	B	B
164	*Gh144	A	B	A	B	A	B	-	B	B	A	B	A	A	A	A	A	B	A	A	B	B	B	A	A	A	B	B	B	B	A	B	A	B	A	B	A	A	B	B	B	B	B	A	A	B	B	B	A
165	*Gh145	A	B	B	B	B	B	B	A	B	B	A	B	B	A	B	B	A	B	A	A	A	A	A	A	A	B	B	A	B	B	A	A	B	B	A	A	A	B	B	A	A	A	B	B	B	B	B	A
166	*Gh157	A	A	B	B	A	A	B	A	B	A	B	B	A	B	A	B	A	A	A	A	A	A	A	A	A	B	A	A	B	A	B	A	A	A	B	B	A	B	B	B	A	A	B	A	B	A	B	B
167	*Gh158	A	B	A	B	A	A	B	B	A	A	A	A	B	A	B	B	B	A	B	B	B	B	A	A	B	B	B	B	A	A	A	A	A	A	A	B	A	A	B	B	B	B	B	B	B	A	B	A
168	*Gh197	A	A	-	B	B	A	B	B	A	A	A	A	A	A	B	A	A	A	A	A	B	A	B	A	B	B	A	B	B	A	B	B	B	B	B	B	B	A	A	B	B	B	A	B	B	B	A	A
169	*Gh199	B	B	A	A	B	A	A	B	A	A	A	B	A	B	B	A	B	B	A	B	B	B	A	A	A	B	B	B	A	A	B	A	B	B	A	A	A	B	A	A	B	B	A	B	A	B	A	A
170	*Gh220	B	B	B	B	A	-	B	B	A	B	A	B	B	A	B	A	A	B	B	A	A	B	A	A	B	B	A	A	B	B	A	A	B	A	A	A	B	A	A	A	A	A	A	A	A	A	B	A
171	*Gh247	A	B	-	B	B	B	B	B	A	A	B	A	A	A	B	B	B	A	B	A	A	A	A	A	A	B	B	B	A	B	B	A	A	-	A	A	B	B	B	B	A	A	B	B	B	B	B	B
172	*Gh256	A	A	A	A	B	A	A	B	B	A	B	B	B	B	A	A	A	B	A	B	B	B	A	B	A	A	B	B	A	B	A	A	A	B	A	A	B	A	B	B	A	A	A	A	A	A	B	A
173	*Gh260	A	A	B	B	B	B	B	B	A	A	B	B	A	A	B	A	B	B	B	B	A	A	B	A	B	B	A	A	A	B	A	B	B	B	A	B	B	A	A	B	A	B	A	B	B	A	A	B
174	*Gh268	B	A	-	A	A	A	A	A	B	B	A	A	B	A	A	B	B	A	A	A	A	B	A	B	B	A	A	B	B	A	A	A	A	B	A	A	B	A	A	A	A	B	B	A	B	B	B	B
175	*Gh27	A	A	A	B	A	B	B	B	B	B	A	A	B	A	B	B	B	B	B	A	A	B	B	B	A	A	A	B	B	B	B	B	B	B	B	B	A	A	A	A	B	B	B	A	A	A	A	B
176	*Gh273	A	A	B	A	B	A	-	A	B	B	B	A	A	A	B	B	A	A	B	A	B	B	B	A	A	A	B	A	A	B	A	B	A	B	A	A	A	A	A	A	A	A	B	A	A	B	B	B
177	*Gh298	B	A	A	A	B	B	A	A	B	B	B	B	B	A	A	A	B	B	A	A	B	-	A	A	B	B	A	B	B	B	A	A	B	B	A	A	B	A	B	A	B	B	B	B	B	B	A	A
178	*Gh308	A	B	A	B	B	B	B	A	B	B	A	B	B	A	B	B	A	B	A	A	A	A	A	A	A	B	B	A	B	B	A	A	B	B	A	A	A	-	B	A	A	A	B	B	B	B	B	A
179	*Gh316	A	A	-	A	A	A	-	A	A	A	B	B	A	B	B	B	B	B	A	B	A	A	B	B	A	B	A	-	A	B	A	B	A	-	B	B	B	A	B	B	B	A	A	A	A	A	A	A
180	*Gh320	A	B	A	-	A	B	-	B	B	A	B	A	A	A	A	A	B	-	A	B	B	B	A	A	A	B	B	B	B	A	B	A	B	-	B	A	A	B	B	B	B	B	A	A	B	B	B	A
181	*Gh327	A	B	A	A	B	A	A	B	B	B	B	A	A	A	A	A	B	B	A	B	B	A	A	B	B	B	B	-	B	A	A	A	A	A	A	A	B	A	A	A	A	A	B	A	A	A	-	B
182	*Gh388	B	B	A	A	A	A	-	A	A	A	B	B	B	A	B	A	B	A	A	A	B	A	A	B	A	A	B	A	A	A	A	A	B	B	A	A	B	B	B	A	B	-	A	A	A	B	B	B
183	*Gh398	A	B	A	A	A	A	A	A	A	B	B	B	A	B	A	B	A	B	B	A	-	A	A	B	B	A	A	A	A	A	B	A	A	B	B	A	B	A	B	B	A	B	B	B	A	B	B	A
184	*Gh451	A	B	B	A	B	B	A	B	B	A	B	B	B	A	A	B	B	A	B	A	A	B	B	A	A	B	B	B	B	B	A	B	B	-	A	B	A	B	B	A	A	A	B	A	B	A	A	B
185	*Gh454	B	A	A	A	A	A	A	A	B	B	B	A	B	A	A	B	B	A	A	A	A	B	A	B	B	A	A	B	B	A	A	A	A	B	A	A	B	A	A	A	A	B	B	A	B	B	B	A
186	*Gh474	A	B	-	B	B	B	B	A	B	B	-	B	B	A	B	B	A	B	A	A	A	A	A	A	A	B	B	A	B	B	A	A	B	B	A	A	A	B	B	A	A	A	B	B	B	B	B	A
187	*Gh499	A	A	-	B	A	B	B	B	B	B	A	A	B	A	B	B	B	B	B	A	A	B	B	B	A	A	A	B	B	B	B	B	B	B	B	B	A	A	A	A	B	-	B	A	A	A	A	B
188	*Gh501	A	-	A	A	A	B	A	A	B	B	A	B	B	A	B	A	A	B	B	A	B	A	B	A	B	A	B	A	B	B	B	B	A	B	B	A	B	A	A	A	B	A	B	A	B	A	A	B
189	*Gh529	A	A	B	A	A	B	A	B	A	A	B	A	A	A	B	B	B	B	B	B	A	B	B	B	A	B	A	A	B	A	A	B	B	A	B	B	B	B	A	A	B	B	A	B	B	B	A	A
190	*Gh56	B	A	B	B	A	B	B	A	B	A	B	A	B	A	A	A	A	A	A	B	B	A	B	B	A	B	B	A	B	A	B	B	A	A	B	B	A	A	A	B	B	A	A	A	B	A	B	B
191	*Gh60	A	B	A	A	A	B	A	A	B	B	A	B	B	A	B	A	A	B	B	A	B	A	B	A	B	A	B	A	B	B	B	B	A	B	B	A	B	A	A	A	B	A	B	A	B	A	A	B
192	*Gh616	A	B	A	A	B	B	A	A	A	A	A	A	B	A	A	A	B	B	B	A	A	B	B	B	A	A	A	B	A	A	B	B	A	B	A	B	B	A	B	A	A	A	A	B	A	A	A	A
193	*Gh631	B	A	-	B	A	A	B	A	B	B	B	A	A	B	A	A	B	A	B	B	A	B	A	A	B	A	A	A	B	B	B	A	B	B	A	B	B	B	A	-	B	A	A	A	B	B	B	A
194	*Gh64	B	A	B	B	A	A	A	A	B	A	B	A	B	B	A	A	B	A	B	A	B	A	B	B	A	B	B	A	A	B	A	B	B	A	A	A	B	B	A	A	B	B	A	B	B	A	A	B
195	*Gh663	A	B	-	A	A	A	A	B	B	B	B	A	A	B	A	B	B	A	A	A	A	B	B	B	A	A	A	A	A	B	B	B	B	B	B	A	B	A	B	B	A	B	A	B	B	B	A	A
196	*Gh72	A	B	A	A	B	B	A	A	A	A	A	A	B	A	A	A	B	B	B	A	A	B	B	B	A	A	A	B	A	A	B	B	A	B	A	B	B	A	B	A	A	A	A	B	A	A	A	A
197	*HAU0250	A	A	A	A	A	B	-	A	A	B	B	B	A	A	B	A	A	B	B	A	A	B	A	B	A	A	A	B	A	B	A	A	A	A	A	A	B	B	B	B	A	A	B	B	A	B	A	A
198	*HAU0423	B	A	B	A	A	A	A	B	A	B	A	B	A	A	A	B	A	A	B	B	B	B	A	A	A	A	A	B	A	A	A	A	B	B	B	B	B	A	B	B	A	B	B	A	B	A	B	B
199	*HAU0483	B	A	-	A	B	B	A	A	B	A	A	B	B	A	B	B	B	A	B	A	A	A	A	A	A	A	A	B	B	B	B	A	A	B	B	B	B	B	A	B	A	A	A	A	A	B	A	B
200	*HAU0635	A	B	A	B	B	B	-	B	A	A	B	B	A	B	A	A	B	A	B	A	B	B	A	A	A	B	B	B	B	B	B	A	B	A	B	A	A	A	B	B	B	B	B	A	B	B	B	B
201	*HAU0639	A	A	B	A	A	A	B	A	A	A	B	B	A	B	B	B	B	B	A	B	A	A	B	B	A	B	A	B	A	B	A	B	A	B	B	B	B	A	-	B	B	A	A	A	A	A	A	A
202	*HAU0878	A	B	A	A	B	B	A	A	A	A	A	A	B	A	A	A	B	B	B	A	A	B	B	B	A	A	A	B	A	A	B	B	A	B	A	B	B	A	B	A	A	B	A	B	A	A	A	B
203	*HAU0921	B	A	A	A	B	B	A	A	B	A	A	B	B	A	B	B	B	A	B	A	A	A	A	A	A	A	A	B	B	B	B	A	A	B	B	A	B	B	A	B	A	A	A	A	A	B	A	B
204	*HAU1001	A	B	A	A	A	A	A	A	A	A	A	B	A	B	A	A	B	A	B	B	A	B	A	A	B	B	B	B	B	B	B	A	B	B	B	B	B	B	A	A	B	A	B	A	B	A	A	A
205	*HAU1057	B	A	A	B	B	B	B	A	B	A	A	A	A	A	A	A	B	A	B	B	B	B	B	A	B	B	A	B	B	B	B	B	B	B	A	B	B	A	A	B	A	B	A	A	A	B	B	A
206	*HAU1129	B	A	A	A	B	B	A	A	A	B	B	B	A	A	B	A	B	A	A	A	B	A	A	B	A	B	A	A	B	A	B	A	A	A	B	B	A	A	A	B	A	B	A	A	B	A	B	B
207	*HAU1316	A	B	B	B	A	A	B	A	A	A	A	B	B	A	A	A	B	A	A	B	A	B	A	B	B	A	A	B	A	B	A	A	B	B	B	A	B	A	A	A	B	A	B	A	A	B	B	B
208	*HAU1321	A	B	B	B	A	A	B	A	A	A	A	B	B	A	A	A	B	A	A	B	A	B	A	B	B	A	A	B	A	B	A	A	B	B	B	A	B	A	A	A	B	A	B	A	A	B	B	B
209	*HAU1332	-	-	-	-	-	-	-	-	-	-	-	-	-	-	-	-	-	-	-	-	-	-	-	-	-	-	-	-	-	-	-	-	-	-	-	-	-	-	-	-	-	-	-	-	-	-	-	-
210	*HAU1371	B	B	A	A	A	B	A	A	A	A	A	B	A	A	B	B	B	A	B	B	A	A	A	A	A	A	A	B	B	B	B	A	A	B	B	A	B	A	A	A	A	A	A	A	A	B	A	B
211	*HAU1378	A	A	A	A	A	B	A	A	A	A	A	B	A	A	B	A	B	B	A	A	B	B	A	B	A	B	B	B	B	B	A	-	A	B	A	A	B	A	A	A	A	B	A	A	A	A	A	A
212	*HAU1382	B	B	B	B	B	B	B	A	A	A	B	A	A	B	B	B	A	A	A	A	A	B	A	B	B	B	A	B	A	A	A	A	B	B	A	A	A	B	A	B	A	A	A	B	A	A	B	B
213	*HAU1413	B	B	A	A	A	B	A	B	B	B	A	B	A	B	B	A	A	B	A	B	A	B	B	A	A	B	A	A	A	B	A	B	B	B	B	A	B	A	A	A	A	A	B	B	B	B	B	A
214	*HAU1417	A	A	A	A	A	A	A	A	A	B	A	B	A	A	B	A	A	B	A	A	B	A	B	B	B	B	A	A	B	B	A	A	A	A	A	A	A	A	B	A	B	B	B	A	-	B	B	A
215	*HAU1455	A	B	B	B	B	B	B	A	A	A	A	A	A	B	A	A	A	A	B	A	B	B	B	A	B	B	A	B	A	B	B	B	B	A	B	B	B	A	B	B	A	A	A	A	A	A	B	A
216	*HAU1460	A	-	A	A	A	A	A	A	A	A	A	B	A	A	B	B	B	A	B	B	A	A	A	A	A	B	A	B	B	B	B	A	A	B	B	A	A	A	A	A	A	A	A	A	A	B	A	A
217	*HAU1470a	A	B	B	B	A	A	B	B	B	A	A	B	A	B	B	A	A	A	A	A	A	B	B	A	-	B	B	B	B	A	A	B	B	B	B	B	A	A	A	B	B	B	B	B	B	A	B	-
218	*HAU1470b	A	B	A	B	A	A	A	A	A	A	A	B	A	B	B	A	A	A	A	A	A	B	B	A	-	B	B	B	B	A	A	B	B	B	B	B	A	A	A	B	B	B	B	B	B	A	B	-
219	*HAU1483a	A	B	B	B	B	B	B	A	B	B	A	B	B	A	B	B	A	B	A	A	A	A	A	A	A	B	B	-	-	B	A	A	B	B	A	A	A	B	B	A	A	A	B	B	B	B	B	A
220	*HAU1483b	A	B	B	B	B	B	B	A	B	B	A	B	B	A	B	B	A	B	A	A	A	A	A	A	A	B	B	A	B	B	A	A	B	B	A	A	A	B	B	A	A	A	B	B	B	B	B	A
221	*HAU1571	A	A	B	B	B	A	B	A	B	B	A	A	A	A	A	A	A	B	B	B	A	A	B	A	A	A	A	B	A	A	B	B	B	B	A	B	A	A	A	A	A	A	A	B	B	B	A	B
222	*HAU1603	B	B	B	A	A	A	B	A	A	A	B	B	B	A	B	A	B	A	A	A	B	A	A	B	A	A	B	A	A	A	A	B	B	B	A	A	B	B	B	A	B	B	A	A	A	B	B	B
223	*HAU1618	B	A	A	A	B	A	A	B	A	A	B	A	B	A	B	B	B	B	B	B	A	B	B	A	B	A	A	B	B	B	A	B	A	A	A	A	A	B	A	B	B	A	B	B	A	A	B	B
224	*HAU190	B	A	A	A	B	A	A	B	A	B	B	A	B	A	B	B	A	B	B	B	A	B	B	A	B	A	A	B	B	B	A	B	A	A	A	A	A	B	A	B	B	A	A	B	A	B	B	A
225	*HAU2004	B	B	A	A	B	A	A	-	A	B	A	B	A	A	A	B	A	A	B	A	B	B	A	B	A	A	A	B	A	A	A	A	B	B	A	B	B	B	A	B	A	B	B	A	B	B	-	B
226	*HAU2424	A	B	B	A	-	-	-	-	B	B	B	A	B	B	A	B	B	A	A	A	-	-	B	B	A	A	B	A	A	A	A	B	B	A	B	A	B	A	B	B	A	B	A	B	B	B	A	A
227	*HAU2504	A	-	A	A	B	A	A	A	B	B	B	B	B	A	A	B	A	A	B	-	B	B	B	B	A	A	B	A	A	B	A	B	A	B	A	A	B	-	B	A	A	A	B	A	B	B	A	B
228	*HAU2558	A	A	B	B	A	B	-	A	B	A	A	B	A	B	A	A	A	A	A	A	A	A	A	A	A	B	A	A	B	A	B	A	B	A	B	B	A	B	B	A	A	A	B	-	B	A	B	B
229	*HAU2625	B	A	B	A	B	B	A	A	B	A	A	B	B	A	B	B	B	A	B	A	A	A	A	-	A	A	A	B	B	B	B	A	A	B	B	A	B	B	A	B	A	A	A	A	A	B	A	B
230	*HAU2768	B	A	B	A	B	B	B	-	B	A	A	B	B	A	B	B	B	A	B	A	A	A	A	A	-	A	A	B	B	B	B	A	A	-	B	A	B	B	A	B	A	A	A	A	A	B	A	B
231	*HAU2786a	B	A	B	B	B	B	A	B	B	B	A	B	A	A	A	B	A	B	B	B	A	B	A	A	A	B	A	A	A	A	B	A	A	-	A	B	B	A	A	-	B	B	A	B	B	A	B	B
232	*HAU2786b	B	B	A	A	A	B	A	B	B	B	A	B	A	B	B	A	A	B	A	B	A	B	B	A	A	B	A	A	A	B	A	B	B	B	B	A	B	A	A	-	A	A	B	B	B	B	B	A
233	*HAU2857	A	A	B	B	B	B	B	A	B	A	A	B	A	A	A	A	B	A	B	A	A	A	A	A	A	B	A	A	B	A	A	A	B	A	B	B	B	A	A	B	A	A	A	B	B	A	B	A
234	*HAU3069	B	A	B	B	A	A	B	A	A	A	A	A	A	A	A	A	B	A	B	A	B	A	B	A	A	B	B	B	A	B	B	B	B	A	B	A	B	B	A	B	A	A	B	B	B	B	B	A
235	*HAU3071	A	A	B	B	A	B	B	A	A	A	A	A	B	B	B	A	B	A	B	A	B	A	A	A	A	A	B	B	B	A	A	A	A	A	B	B	B	A	B	B	B	A	A	-	B	A	B	B
236	*HAU3177	-	A	B	B	A	A	B	B	A	B	A	B	A	A	B	A	A	A	A	A	B	B	B	A	B	B	B	B	B	B	B	B	B	B	B	B	B	B	A	A	B	A	B	B	A	B	A	B
237	*JESPR154	B	B	A	A	B	A	A	B	A	B	A	B	A	A	A	B	A	A	B	B	B	B	B	B	A	A	A	B	A	A	A	B	B	B	A	B	B	B	A	B	A	B	B	A	B	B	B	B
238	*JESPR295	A	B	B	B	A	B	B	B	A	B	A	A	A	B	A	A	B	B	B	A	B	A	A	B	A	A	A	B	B	B	A	A	A	A	B	A	A	A	A	A	B	B	A	A	B	B	B	A
239	*JESPR297	A	B	A	A	A	B	-	-	A	B	B	B	B	B	B	A	A	A	A	A	B	A	B	B	B	B	A	B	A	B	A	B	A	B	A	A	A	A	B	B	B	A	B	A	B	A	B	B
240	*JESPR304	B	A	B	B	A	A	B	A	A	A	B	A	A	A	B	B	A	A	A	A	B	A	B	B	B	B	B	A	B	A	B	B	B	B	B	B	A	A	A	A	A	A	B	B	B	B	B	B
241	*MGHES18	B	A	-	A	B	B	A	A	-	A	A	B	-	A	B	B	B	A	B	A	A	-	A	A	A	A	A	B	B	B	B	A	A	-	B	B	B	B	B	B	A	A	A	A	A	B	A	B
242	*MGHES24	A	A	B	B	B	B	B	B	A	A	B	B	B	B	A	B	B	B	A	B	A	B	B	A	B	A	A	A	B	B	A	B	B	A	B	B	A	A	A	A	A	A	A	B	A	A	B	A
243	*MGHES31	A	A	B	B	B	A	A	A	B	B	A	A	A	A	A	A	A	B	B	B	A	A	B	A	A	A	A	B	A	A	B	A	B	B	A	B	A	A	A	A	A	A	A	B	B	B	A	A
244	*MGHES58	B	A	A	A	B	B	A	A	A	B	A	A	B	A	A	A	A	A	A	B	A	A	B	B	B	B	B	A	A	B	B	B	B	B	B	A	B	B	B	A	B	A	A	B	B	A	A	B
245	*MUSS059	A	B	A	A	B	A	-	A	A	B	B	A	A	B	B	A	B	A	B	A	B	B	B	B	B	A	B	B	B	A	A	B	A	B	B	A	A	A	B	B	A	B	A	A	A	A	-	B
246	*MUSS193	B	B	A	A	A	A	A	A	A	A	B	B	A	A	B	B	B	A	B	A	B	A	A	B	A	A	B	A	-	A	A	A	B	B	A	A	B	B	B	A	B	B	A	A	A	B	B	A
247	*MUSS422	A	B	A	A	A	A	A	A	B	A	B	A	B	A	B	B	A	B	A	A	B	B	B	A	B	B	A	B	B	B	A	B	A	A	A	A	B	A	A	A	A	A	A	B	B	B	B	B
248	*NAU1014	A	A	A	A	A	A	A	A	A	A	B	B	A	B	B	B	B	B	A	B	A	A	B	B	A	B	A	B	A	B	A	B	A	A	B	B	B	A	B	B	B	A	A	A	A	A	A	A
249	*NAU1042	A	B	A	A	B	B	A	A	A	A	A	A	B	A	A	A	B	B	B	A	A	B	-	B	A	A	A	B	A	A	B	B	A	B	A	B	B	A	B	A	A	B	A	B	A	A	A	B
250	*NAU1043	B	A	A	A	B	B	A	A	A	B	A	A	B	A	A	A	A	A	A	B	A	A	B	B	B	B	B	A	A	B	B	B	B	B	B	A	B	B	B	A	B	A	A	B	B	A	A	B
251	*NAU1093	B	A	A	A	B	B	A	A	B	A	A	B	B	A	B	B	B	-	B	A	A	A	A	A	A	A	A	B	B	B	B	A	A	B	B	B	B	B	B	B	A	A	A	A	A	B	A	B
252	*NAU1218	B	A	B	A	B	B	A	A	B	A	A	B	B	A	B	B	B	A	B	A	A	A	A	A	A	A	A	-	B	B	B	A	A	B	B	B	B	B	B	B	A	A	A	A	A	B	A	B
253	*NAU1269	A	B	A	A	B	B	A	A	A	A	A	A	B	A	A	A	B	B	B	A	A	B	B	B	A	A	A	B	A	A	B	B	A	B	A	B	B	A	B	A	A	-	A	B	A	A	A	B
254	*NAU1282	B	A	B	B	B	A	B	B	A	A	B	A	B	A	B	B	B	B	B	B	A	B	B	A	B	A	A	B	B	A	A	B	B	A	A	A	A	B	B	B	A	A	B	B	A	A	B	B
255	*NAU1357	B	B	B	A	A	B	A	B	B	A	B	A	B	B	B	A	B	B	B	B	B	B	A	B	A	A	B	A	A	A	A	A	B	B	A	A	B	B	B	B	A	A	A	A	A	B	A	B
256	*NAU2026	A	B	A	A	B	A	A	A	B	A	A	A	A	-	A	A	B	A	B	B	A	B	A	A	A	B	A	B	A	B	A	A	A	B	B	A	B	B	A	A	A	A	A	A	A	B	A	B
257	*NAU2139	A	A	B	B	B	B	B	B	A	A	A	B	A	B	A	B	A	B	A	A	B	B	A	A	B	B	B	B	A	B	B	A	A	A	B	A	A	A	B	A	B	B	B	B	B	A	A	A
258	*NAU2140	A	B	B	B	B	A	B	A	A	A	A	A	B	A	B	A	B	B	B	B	B	B	B	A	A	B	A	A	A	B	B	B	A	B	B	A	B	A	A	A	A	A	A	B	B	B	B	B
259	*NAU2152	A	B	-	A	B	B	A	A	A	A	B	B	A	B	A	B	A	B	A	A	B	B	A	A	B	A	B	B	A	A	A	A	A	B	A	B	B	B	B	B	A	A	A	A	A	B	B	A
260	*NAU2218	B	A	A	A	A	B	A	A	A	B	A	A	A	A	A	B	B	B	B	A	B	B	A	B	B	B	A	B	B	B	A	A	A	A	A	A	B	B	A	B	A	A	A	B	B	B	B	A
261	*NAU2265	A	B	A	A	B	A	A	A	A	B	B	A	A	B	B	A	B	A	B	A	B	B	B	B	B	A	B	B	B	A	A	B	A	B	B	A	A	A	B	B	A	B	A	A	A	A	B	B
262	*NAU2277	A	B	A	A	B	A	-	A	A	B	B	A	A	B	B	A	B	A	B	A	B	B	B	B	B	A	B	B	B	A	A	B	A	B	B	A	A	A	B	B	A	B	A	A	A	A	B	B
263	*NAU2343	A	A	A	A	A	A	-	A	A	B	B	-	A	A	B	A	A	B	A	A	B	A	B	B	B	B	B	A	B	B	A	B	A	A	A	A	A	A	B	A	B	B	B	B	B	B	B	-
264	*NAU2460	A	B	A	A	B	B	A	A	A	A	B	B	A	B	A	B	A	B	A	A	B	B	A	A	B	A	B	B	A	A	A	A	A	B	A	B	B	A	B	B	A	A	A	A	A	B	B	A
265	*NAU2701	A	B	B	B	B	B	B	B	A	A	B	A	A	A	A	A	B	B	A	A	A	B	A	A	-	A	A	B	B	B	A	A	A	B	A	A	A	B	B	A	A	A	B	A	B	A	A	B
266	*NAU2715	A	B	B	B	B	A	B	B	B	B	B	A	A	B	A	A	A	A	B	B	A	B	B	B	A	A	A	A	A	B	B	B	B	B	A	B	B	B	A	B	A	A	A	A	A	A	A	A
267	*NAU2742	B	A	B	B	B	B	B	B	B	B	A	B	A	-	A	B	A	B	B	B	A	B	A	A	A	B	A	A	A	A	B	-	A	B	A	B	B	A	A	B	B	B	A	B	B	A	B	B
268	*NAU2873	B	A	B	B	B	A	B	A	A	A	B	A	B	-	B	B	B	B	B	B	A	B	B	A	B	A	A	B	B	A	A	B	B	A	A	A	A	B	B	B	A	A	B	B	A	A	B	B
269	*NAU2893	A	A	B	B	A	B	A	A	B	A	A	B	A	A	A	A	A	A	A	A	A	A	A	A	A	B	A	A	B	A	B	A	B	A	B	B	A	B	B	A	A	A	B	-	B	A	B	A
270	*NAU2894	B	A	B	B	A	A	-	A	A	A	A	A	A	A	A	A	B	A	B	A	B	A	B	A	A	B	B	B	A	B	B	B	B	A	B	A	B	B	A	B	A	A	B	B	B	B	B	A
271	*NAU2957	A	B	B	B	B	A	B	A	A	A	A	A	B	A	B	A	B	B	B	B	B	B	B	A	A	B	A	A	A	B	B	B	A	B	B	A	B	A	A	A	A	A	A	B	B	B	B	B
272	*NAU2960	A	A	A	A	A	B	A	A	A	B	B	A	B	A	A	B	B	B	B	A	B	A	A	B	B	B	-	A	A	A	-	A	A	A	B	B	B	A	B	B	A	A	A	B	B	B	B	A
273	*NAU2984	B	A	A	A	B	A	B	B	A	B	B	B	A	A	B	A	B	A	A	A	A	A	A	B	A	B	A	B	B	A	B	A	A	A	B	B	B	A	A	B	A	B	A	-	B	A	B	B
274	*NAU3052	B	B	-	B	B	B	B	B	A	A	B	A	A	A	B	B	B	A	B	A	A	A	A	A	A	B	B	B	B	B	B	A	A	-	A	A	B	B	B	B	B	B	B	B	B	A	A	B
275	*NAU3100	A	B	A	A	B	A	A	B	B	B	B	A	A	A	A	A	B	B	A	B	B	A	A	-	B	B	-	-	B	A	A	A	A	A	A	A	B	A	A	-	A	A	B	A	A	-	A	-
276	*NAU3112	B	B	A	B	B	B	B	B	A	B	A	B	B	A	B	A	A	B	B	B	A	B	B	B	B	A	A	A	A	B	A	B	A	B	A	A	B	A	A	A	B	B	A	A	A	A	B	B
277	*NAU3177	A	B	A	A	A	A	A	B	A	B	B	B	A	B	A	B	A	B	B	B	B	A	B	B	B	A	A	A	B	B	B	B	A	B	B	A	B	A	B	B	A	A	B	B	A	B	B	B
278	*NAU3181	B	A	B	A	A	B	B	B	A	B	A	A	B	A	B	A	A	A	A	B	A	A	B	B	B	B	B	A	A	B	B	B	B	B	A	A	B	B	B	B	A	A	A	-	B	A	A	B
279	*NAU3217	B	A	A	A	A	B	A	A	B	B	A	A	A	B	A	A	A	A	B	A	A	A	B	A	A	B	B	A	A	B	A	B	B	A	B	B	A	B	B	B	A	A	B	B	B	A	B	B
280	*NAU3254	A	A	A	A	A	A	A	A	A	B	B	B	A	A	B	A	A	B	A	A	B	A	B	B	B	B	B	A	B	B	A	B	A	A	A	A	A	A	B	A	B	B	B	B	B	B	B	B
281	*NAU3308	B	B	B	B	B	B	B	A	B	A	A	A	A	A	A	A	B	A	B	B	B	B	B	A	B	B	A	B	B	B	B	B	B	B	A	B	B	A	A	B	A	B	A	A	A	B	B	A
282	*NAU3384	A	B	-	B	B	B	B	A	B	A	B	A	B	A	B	B	A	B	A	A	B	B	B	A	B	B	A	B	B	B	A	B	B	-	A	A	B	B	A	A	A	A	A	B	B	B	B	B
283	*NAU3385	A	B	A	A	A	A	-	A	B	A	B	A	B	A	B	B	A	B	A	A	B	B	B	A	B	B	A	B	B	B	A	B	A	B	A	A	B	B	A	A	A	A	A	B	B	B	B	B
284	*NAU3390	A	B	B	B	B	B	A	A	A	A	B	B	A	B	A	B	A	B	A	A	B	B	A	A	B	A	B	B	A	A	A	A	-	B	A	B	B	A	B	B	A	A	A	A	A	B	B	A
285	*NAU3404	B	B	A	A	A	A	A	B	A	A	A	B	A	B	A	B	B	A	A	B	B	B	A	A	A	B	B	B	A	A	B	A	B	B	A	A	A	B	B	A	B	B	A	B	B	B	A	B
286	*NAU3437	B	B	A	A	B	B	-	B	A	A	A	B	B	A	A	A	B	B	A	A	B	B	B	B	B	A	B	B	A	A	A	B	A	B	A	B	A	A	A	B	B	B	A	A	A	A	A	B
287	*NAU3468	A	A	B	B	B	B	B	A	B	A	A	A	A	A	A	A	B	A	B	A	A	A	A	A	A	B	A	A	B	A	A	A	B	A	B	B	B	A	A	B	A	A	A	B	B	A	B	A
288	*NAU3519	B	B	B	B	A	A	B	B	A	A	A	B	B	A	A	A	A	A	A	A	A	A	A	A	B	A	A	A	A	B	B	A	A	B	B	B	A	A	A	B	A	A	A	A	B	A	A	A
289	*NAU3695	A	A	B	A	A	A	A	A	B	A	A	A	B	B	A	A	B	A	A	A	A	A	B	B	A	A	A	A	A	A	A	B	A	B	A	B	A	A	A	A	A	A	A	A	B	A	A	B
290	*NAU3736	A	B	A	A	B	A	A	A	B	A	B	B	B	A	A	B	A	B	A	B	B	A	A	A	B	B	A	B	B	B	B	A	B	B	A	A	A	B	B	A	A	A	B	A	B	B	B	B
291	*NAU3765	B	B	B	A	B	A	-	B	A	-	A	B	A	A	A	B	A	A	B	A	B	B	A	B	B	A	-	-	-	-	-	-	A	A	B	A	B	A	A	A	A	A	B	B	B	B	A	B
292	*NAU3820	A	A	B	A	A	B	A	-	A	A	B	A	A	A	B	B	B	B	B	B	A	B	B	B	A	B	A	A	B	A	A	B	B	A	B	B	B	B	A	A	B	B	A	B	B	B	A	A
293	*NAU3839	B	A	B	B	B	B	A	B	B	B	A	B	A	A	A	B	A	B	B	B	A	B	A	A	A	B	A	A	A	A	B	A	A	A	A	B	B	A	A	B	-	B	A	B	B	A	B	B
294	*NAU3868	B	B	-	B	B	A	B	A	A	B	B	B	A	B	B	A	B	A	A	B	B	A	A	B	B	A	A	B	B	A	A	A	A	A	A	A	B	A	B	A	A	A	A	A	B	A	B	A
295	*NAU3901	-	-	B	B	-	B	-	-	-	A	-	-	B	-	A	-	-	A	-	-	A	A	-	B	B	A	A	A	-	B	A	-	B	-	-	A	-	A	A	-	-	-	A	A	-	A	-	B
296	*NAU3934	A	A	B	B	A	B	B	A	A	B	B	A	A	A	B	A	A	A	B	B	B	B	A	B	A	B	B	A	B	A	A	A	A	B	A	B	A	B	A	B	B	B	A	A	A	B	B	B
297	*NAU3966	A	B	A	B	A	A	B	B	A	A	A	A	B	A	B	B	B	A	B	B	B	B	A	A	B	B	B	B	A	A	A	A	A	-	A	B	A	A	B	B	B	B	B	B	B	A	B	A
298	*NAU3995a	A	B	A	A	A	B	A	B	B	B	A	B	A	B	B	A	A	B	A	B	A	B	B	A	A	B	A	A	A	B	A	B	B	B	B	A	B	A	A	A	A	A	B	B	B	B	B	A
299	*NAU3995b	A	A	B	B	B	B	B	B	B	B	A	B	A	A	A	B	A	B	B	B	A	B	A	A	A	B	A	A	A	A	B	A	A	A	A	B	B	A	A	B	B	B	A	B	B	A	B	B
300	*NAU4034	B	B	A	A	A	A	A	A	A	A	B	B	B	A	B	A	B	A	A	A	B	A	A	B	A	A	B	A	A	A	A	A	B	B	A	A	B	B	B	A	B	B	A	A	A	B	B	B
301	*NAU4045	A	B	-	A	A	A	A	B	A	B	B	B	A	B	A	B	A	B	B	B	B	A	B	B	B	A	A	A	B	A	B	B	A	B	B	A	B	A	B	B	A	A	B	B	A	B	B	B
302	*NAU4064	B	A	B	B	A	A	B	B	A	B	A	B	A	A	B	A	A	A	A	A	B	B	B	A	B	B	B	B	B	B	B	B	B	B	B	B	B	B	A	A	B	A	B	B	A	B	A	B
303	*NAU5072	A	B	B	B	-	A	B	B	B	B	B	A	A	B	A	A	A	A	B	B	A	B	B	B	A	A	A	A	A	B	B	B	B	B	A	B	B	B	A	B	A	A	A	A	A	A	A	A
304	*NAU5120	B	B	-	B	B	B	B	A	A	A	B	A	B	A	B	A	A	A	A	-	B	A	B	B	A	B	B	A	B	A	B	B	A	A	B	B	A	A	A	B	B	A	A	A	B	A	B	A
305	*NAU5260	A	A	B	B	B	B	B	B	A	-	B	B	B	A	A	B	A	A	A	B	A	A	A	A	A	A	A	B	A	A	B	A	A	B	A	B	B	A	A	B	A	A	A	B	B	-	B	B
306	*NAU5330	B	B	A	B	B	A	A	B	B	B	B	B	B	B	B	B	B	B	B	A	A	B	B	B	A	A	A	B	A	A	B	B	A	B	A	B	B	A	B	A	A	A	A	B	A	A	A	A
307	*NAU5428	A	B	B	A	B	A	A	A	A	A	B	B	A	B	A	B	A	B	A	A	B	B	A	A	B	B	B	B	A	A	A	A	A	B	A	B	B	A	B	B	A	A	A	A	A	-	B	-
308	*NAU5434	B	A	A	A	B	B	A	A	B	A	A	B	B	A	B	B	B	A	B	A	A	A	A	A	A	A	A	B	B	B	B	A	A	B	B	B	B	B	A	B	A	A	A	A	A	B	A	B
309	*NAU5474	B	B	-	B	B	B	B	B	A	A	B	A	A	A	B	B	B	A	B	B	A	A	A	A	A	B	B	B	B	B	B	A	A	A	A	A	B	B	B	B	B	B	B	B	B	A	A	A
310	*NAU6240	A	A	B	B	A	B	B	A	A	A	B	B	A	A	B	A	A	B	A	B	A	A	B	A	A	B	B	A	A	B	B	B	B	B	B	B	B	B	A	B	A	B	A	B	A	B	A	A
311	*NAU6309	A	B	A	A	B	A	A	A	B	A	B	B	B	A	A	B	A	B	A	B	B	A	A	B	B	B	A	B	B	B	-	A	B	B	A	A	A	B	B	A	A	A	B	A	B	B	B	B
312	*NAU6367	A	B	A	A	A	A	A	A	B	A	B	A	B	A	B	B	A	B	A	A	B	B	B	A	B	B	A	B	B	B	A	A	A	A	A	A	B	B	A	A	A	A	A	B	B	B	B	B
313	*NAU748	A	B	B	B	A	B	A	-	B	A	A	B	B	A	A	A	A	B	B	A	A	A	B	A	A	B	B	A	B	B	B	B	A	B	B	A	B	A	A	B	B	A	B	B	A	A	A	A
314	*NAU797	A	B	A	A	B	B	A	A	A	A	A	A	B	A	A	A	B	B	B	A	A	B	B	B	A	A	A	B	A	A	B	B	A	B	A	B	B	A	B	A	A	B	A	B	A	A	A	B
315	*NAU828	A	B	A	A	B	B	A	A	A	A	A	A	B	A	A	A	B	B	B	A	A	B	B	B	A	A	A	B	A	A	B	B	A	B	A	B	B	A	B	A	A	B	A	B	A	A	A	B
316	*NAU833a	A	B	A	A	B	B	A	A	A	A	A	A	B	A	A	A	B	B	B	A	A	B	B	B	A	A	A	B	A	A	B	B	A	B	A	B	B	A	B	A	A	A	A	B	A	A	A	A
317	*NAU833b	A	B	A	A	B	B	A	A	A	A	A	A	B	A	A	A	B	B	B	A	A	B	-	B	A	A	A	B	A	A	B	B	A	B	A	B	B	A	B	A	A	B	A	B	A	A	A	B
318	*NAU845	A	A	A	A	B	B	-	A	B	A	A	B	A	B	B	B	B	A	B	B	A	A	B	A	B	B	B	A	B	B	B	B	B	B	B	A	A	A	B	A	B	B	B	B	B	B	A	B
319	*NAU862	B	A	A	B	B	B	B	A	A	A	B	A	A	A	B	A	A	A	A	A	B	A	B	B	A	B	B	A	B	A	B	B	A	A	B	B	A	A	A	B	B	A	A	A	B	A	B	A
320	*NAU874	B	A	-	B	-	B	B	A	B	A	A	A	B	A	A	A	B	A	B	A	B	B	B	B	B	B	A	B	B	B	B	B	B	B	A	B	B	A	A	B	A	B	A	B	A	B	B	B
321	*NAU895	A	B	A	A	B	A	A	A	A	B	B	A	A	B	B	A	B	A	B	A	B	B	B	B	B	A	B	B	B	A	A	B	A	B	B	A	A	A	B	B	A	B	A	A	A	A	-	B
322	*NAU896	B	B	-	B	A	A	B	B	A	B	B	A	A	B	A	A	A	B	B	A	A	A	A	A	A	A	A	B	B	B	B	A	A	B	B	B	B	-	B	B	A	A	A	A	A	B	A	B
323	*NAU935	A	A	B	B	B	B	-	B	A	A	B	B	B	B	A	B	B	B	A	B	A	B	B	A	B	A	A	A	B	B	A	B	B	A	B	B	A	A	A	A	A	A	A	A	A	A	B	A
324	*NAU943	A	A	B	B	A	A	B	A	B	B	B	A	A	B	A	A	B	A	B	B	A	A	A	A	B	A	A	A	B	B	B	A	B	-	A	A	B	B	A	B	B	B	A	B	A	B	B	B
325	*NBRI0014	B	B	B	B	B	B	B	B	A	A	B	B	B	B	A	B	B	B	A	B	B	A	B	A	B	A	A	A	B	B	A	B	B	-	B	B	A	A	A	B	A	A	A	A	A	A	B	B
326	*NBRI0694	B	B	A	A	A	A	A	A	A	A	B	B	A	A	B	B	B	B	B	A	B	A	A	B	B	A	B	A	A	A	A	A	B	-	A	B	B	B	B	B	B	B	A	A	A	B	B	A
327	*PGML0014	A	A	-	B	B	A	B	A	B	A	A	A	A	B	A	B	B	A	A	A	B	A	A	A	A	-	A	A	B	A	B	A	B	A	B	B	A	B	B	B	A	A	B	A	B	A	B	B
328	*PGML0120	A	A	B	B	B	B	B	B	A	A	B	B	A	A	B	A	B	B	B	B	A	A	B	A	B	B	A	A	A	B	A	B	B	B	A	B	B	A	A	B	A	B	A	B	B	A	A	B
329	*PGML0695	A	-	A	A	B	A	A	A	B	A	A	A	A	B	A	A	B	A	B	B	A	B	A	A	A	B	A	B	A	B	A	A	A	B	B	A	B	B	A	A	A	A	A	A	A	B	A	B
330	*PGML0700	B	A	B	B	A	A	B	A	A	A	B	A	A	A	B	B	A	A	A	A	B	A	B	B	B	B	B	A	B	A	B	-	B	B	B	B	A	A	A	A	A	A	B	B	B	B	B	-
331	*PGML0989	B	A	A	B	B	B	B	A	B	A	A	A	A	A	A	A	B	A	B	B	B	B	B	A	B	B	A	B	B	B	B	B	B	-	A	B	B	A	A	B	A	B	A	A	A	B	B	A
332	*PGML1219	B	B	B	B	A	B	B	B	B	B	A	B	B	B	B	A	A	B	B	A	A	B	A	B	B	B	A	A	B	A	A	A	B	A	A	A	A	A	A	A	B	A	A	B	B	A	B	B
333	*PGML1289	B	A	B	B	B	B	-	A	B	A	B	B	B	B	A	B	A	A	A	A	A	B	A	B	A	B	B	A	A	A	B	A	A	B	A	B	A	A	B	B	B	B	A	A	A	A	B	B
334	*PGML1309	A	B	A	A	A	B	B	A	A	B	B	B	B	B	B	A	A	A	A	A	B	A	B	B	B	B	A	B	A	B	A	B	A	B	A	A	A	A	-	B	B	A	B	A	B	A	B	B
335	*PGML1368	A	B	-	A	A	B	A	B	A	A	A	A	A	B	A	B	A	B	B	B	B	B	B	B	A	B	A	B	B	-	B	B	A	A	B	B	B	B	A	B	A	A	A	B	B	B	B	B
336	*PGML1568	A	B	B	A	A	B	A	B	A	A	A	A	A	B	A	B	A	B	A	B	B	B	B	B	A	B	A	B	B	-	B	B	A	A	B	-	A	B	A	B	B	B	A	B	B	B	B	A
337	*PGML1637	A	A	B	B	B	A	B	A	B	B	B	A	A	A	A	A	A	B	-	B	A	A	B	B	A	A	A	B	A	A	B	B	B	B	A	A	A	B	A	B	A	A	A	B	A	B	A	B
338	*PGML1671	B	A	B	B	B	B	B	B	A	B	B	B	A	B	B	A	B	B	A	A	A	A	B	A	B	B	A	A	B	B	B	-	B	B	B	B	B	B	A	B	A	A	A	B	B	B	A	A
339	*PGML1709	-	B	A	A	A	A	A	A	B	B	A	A	A	B	B	B	A	A	A	A	A	A	B	B	A	B	B	A	A	A	A	A	B	B	A	B	A	B	A	B	B	A	B	B	B	B	A	A
340	*PGML1712	A	B	A	B	A	A	-	A	A	A	A	A	A	A	A	A	A	B	A	A	B	A	A	B	A	A	A	A	B	B	A	A	B	A	B	B	B	A	A	A	A	A	B	B	A	A	B	B
341	*PGML1833	B	A	B	B	A	A	B	A	B	B	B	A	A	B	A	B	A	A	A	A	A	A	B	B	B	B	B	A	A	A	A	B	B	A	A	A	A	B	B	A	B	B	A	A	B	B	A	B
342	*PGML1884	A	-	-	B	B	B	-	A	A	A	A	A	A	B	A	A	A	A	B	A	-	B	B	A	B	B	A	B	A	B	B	B	B	A	B	B	B	A	B	B	A	A	A	A	A	A	B	A
343	*PGML1916	B	A	B	A	A	B	B	A	B	A	A	B	A	B	B	A	B	B	A	B	B	A	A	B	A	B	B	A	B	B	B	A	B	B	A	B	B	A	A	B	A	A	B	B	B	B	B	B
344	*PGML1917	B	A	B	B	B	B	B	B	A	B	B	A	A	B	B	A	B	B	B	A	A	B	B	A	-	B	B	A	B	A	A	B	A	B	A	B	B	A	A	B	A	A	A	B	B	A	A	B
345	*PGML2202	B	B	A	A	A	A	A	A	A	A	A	A	B	B	A	B	A	A	A	A	A	A	B	B	A	A	A	B	B	A	A	B	B	-	A	B	B	A	A	A	A	A	A	A	B	A	A	A
346	*PGML2321	B	A	-	B	A	A	B	A	B	B	B	A	A	B	A	B	A	A	A	A	A	A	B	B	B	B	B	A	A	A	A	B	B	A	A	A	A	B	B	A	B	B	A	A	B	B	A	B
347	*PGML2464	B	A	A	A	A	A	A	A	A	A	A	B	A	A	B	B	B	A	B	B	A	A	A	A	A	-	A	B	B	B	B	A	A	B	B	A	-	A	A	-	A	A	A	A	A	B	A	A
348	*PGML2498	B	-	-	B	B	B	-	A	B	A	A	A	B	A	A	A	B	A	B	A	B	B	B	B	B	B	A	B	B	B	B	B	B	B	A	B	B	A	A	B	A	B	A	B	A	B	B	B
349	*PGML2562	A	B	B	B	B	A	B	B	B	B	B	A	A	B	A	A	A	A	B	B	A	B	B	B	A	A	A	A	A	B	B	B	B	B	A	B	B	B	A	B	A	A	A	A	A	A	A	A
350	*PGML2605	A	B	B	B	A	A	B	B	A	B	B	B	A	A	B	B	A	A	A	-	A	B	B	A	A	B	B	B	B	-	A	B	B	-	B	B	A	A	A	B	B	B	B	-	B	A	B	-
351	*PGML2830	A	B	A	B	B	B	B	B	A	A	B	A	A	A	B	B	B	A	B	A	A	A	A	A	A	B	B	B	A	B	B	A	A	-	A	A	B	B	B	B	A	A	B	B	B	B	A	A
352	*PGML2858	B	B	-	B	B	B	B	B	A	B	A	B	B	A	B	A	A	B	B	B	A	B	B	B	B	A	A	-	A	B	A	B	A	-	A	A	B	A	A	A	B	B	A	A	A	A	B	B
353	*PGML3120	B	A	-	A	A	A	A	A	B	B	B	A	B	A	A	B	B	A	A	A	A	-	A	B	B	A	A	B	B	A	A	A	A	B	A	A	B	A	A	A	A	B	B	-	B	B	B	-
354	*PGML3887	A	A	B	B	A	B	B	A	B	A	A	-	A	B	A	B	B	A	A	A	B	A	A	A	A	B	A	A	B	A	B	A	B	A	B	B	A	B	B	A	A	A	B	A	B	A	B	A
355	*PGML4185	A	B	A	A	B	B	A	B	B	B	B	A	A	A	A	A	B	-	A	B	B	A	A	B	B	B	B	A	B	A	A	A	A	A	A	A	B	A	A	A	A	A	B	A	A	B	A	-
356	*PGML4186	A	B	A	A	B	B	A	B	B	B	B	A	A	A	A	A	B	B	A	B	B	A	A	B	B	B	B	A	B	A	A	A	A	A	A	A	B	A	A	A	A	A	B	A	A	B	A	-
357	*PGML4289	A	A	A	A	A	B	A	A	A	B	B	B	A	B	B	A	A	A	A	A	B	A	B	B	B	B	A	B	A	B	A	B	A	B	A	A	A	B	B	B	B	A	B	-	B	A	B	-
358	*PGML4342	B	A	B	B	A	A	B	B	A	A	A	A	A	A	A	A	B	A	A	A	B	A	B	A	A	B	B	B	A	B	B	B	B	B	B	A	B	B	A	B	A	A	B	B	B	B	B	B
359	*PGML4350	B	B	A	A	A	A	A	A	A	A	B	B	A	A	B	B	B	B	B	A	B	A	A	B	A	A	B	A	A	A	A	A	B	B	A	A	B	B	B	A	B	B	A	A	A	B	B	A
360	*PGML4457	B	B	A	A	A	A	-	A	A	A	B	B	B	A	B	B	B	A	B	A	B	A	A	B	A	A	B	A	A	A	A	A	B	B	A	A	B	B	B	A	B	B	A	A	A	-	B	B
361	*PGML4521	A	A	B	B	B	B	-	A	B	A	A	B	A	A	A	A	B	A	B	A	A	A	A	A	A	B	A	A	B	A	A	A	B	A	B	B	B	A	A	B	A	A	A	B	B	A	B	A
362	*PGML4657	B	A	A	A	A	A	A	A	B	B	B	A	B	A	A	B	B	A	A	A	A	A	A	A	B	B	A	B	B	A	A	A	A	B	A	A	B	A	A	A	A	B	B	A	B	B	A	A
363	*PGML4763	A	A	A	A	B	B	A	A	A	A	B	B	A	B	A	A	A	A	B	B	B	B	B	B	A	B	B	A	B	B	B	B	A	B	A	A	B	A	B	B	A	A	A	B	B	A	B	A
364	*SHIN0219	A	A	B	B	A	B	B	B	B	A	B	B	B	A	B	B	A	A	B	B	B	A	B	A	B	A	B	A	B	A	A	B	B	B	B	A	B	B	A	A	A	A	B	A	B	B	B	B
365	*SHIN0376	B	A	A	A	B	B	A	A	A	B	A	A	B	A	A	A	A	A	A	B	A	A	B	B	B	B	B	A	A	B	B	B	B	-	B	A	B	B	B	A	B	A	A	B	B	A	A	B
366	*SHIN0654	A	A	A	A	A	B	A	A	A	A	A	B	A	A	A	A	B	B	A	A	B	B	A	B	A	B	B	B	B	B	A	A	A	B	A	A	B	A	A	A	A	B	A	A	A	A	A	A
367	*SHIN1339	A	A	B	B	B	A	-	B	B	B	B	B	A	B	B	B	A	B	A	B	A	A	A	A	A	A	B	A	A	A	A	A	A	A	B	A	A	B	B	A	A	A	B	A	B	B	B	-
368	*SHIN1341	A	B	B	B	A	A	B	B	B	A	A	B	A	-	A	A	A	A	A	A	A	B	B	A	A	B	B	B	B	A	A	B	-	-	B	B	A	A	A	B	B	B	B	B	B	A	B	A
369	*SHIN1343	-	-	B	B	B	B	B	B	A	A	B	B	B	A	A	B	A	A	A	B	A	A	A	A	A	A	A	B	A	A	B	A	A	B	A	B	B	A	A	B	A	A	A	B	B	A	B	B
370	*SHIN1462	A	A	B	B	B	A	B	A	B	B	A	B	A	B	B	A	B	A	B	A	A	A	B	A	B	B	A	A	B	A	A	B	B	A	B	A	B	A	B	B	A	A	A	B	B	A	B	B
371	*SWU0077	A	A	A	A	A	A	-	A	A	B	B	B	A	A	B	A	A	B	A	A	B	A	B	B	B	B	B	A	B	B	-	B	A	A	A	A	A	A	B	A	B	B	B	B	B	B	B	B
372	*SWU0119	A	A	A	A	A	A	A	A	A	B	B	B	A	A	B	A	A	B	A	A	B	A	B	B	B	B	B	A	B	B	A	B	A	A	A	A	A	A	B	A	B	B	B	B	B	B	B	B
373	*SWU0189	-	B	A	A	A	A	A	B	A	B	A	A	A	A	A	B	A	A	A	A	A	B	A	A	A	A	A	B	A	A	A	A	B	A	A	A	A	A	A	A	A	B	B	A	B	A	A	B
374	*SWU0514	B	A	A	B	A	A	-	A	B	B	B	A	A	B	A	B	A	A	A	A	A	A	B	B	B	B	B	A	A	A	A	B	B	A	A	A	A	B	B	A	B	B	A	A	B	B	A	B
375	*SWU0598	B	A	B	B	B	B	B	A	B	A	B	B	B	B	A	B	A	A	A	A	A	B	A	B	A	B	B	A	A	A	B	B	A	B	A	B	A	A	B	B	B	B	A	A	A	A	B	A
376	*SWU0830	B	B	B	B	B	A	B	A	A	B	A	A	B	A	A	B	A	A	B	A	B	B	A	B	A	B	A	B	B	A	A	A	B	B	A	A	B	B	A	B	A	B	B	A	B	B	B	A
377	*SWU10037	-	B	A	B	B	B	B	A	A	B	B	B	A	A	B	B	B	B	A	A	A	A	A	B	A	B	B	B	A	B	B	A	B	A	B	B	B	A	A	B	A	A	B	A	B	A	B	B
378	*SWU10038	-	B	B	B	B	B	B	B	A	B	B	B	A	A	B	B	B	B	B	A	A	A	A	B	A	B	B	B	A	B	B	B	B	B	B	B	B	A	A	B	A	A	B	A	B	A	B	B
379	*SWU10054	B	B	A	A	B	B	A	A	A	B	B	B	A	A	B	A	B	B	A	A	A	A	A	B	A	B	A	B	A	A	B	A	A	A	B	B	B	A	A	B	B	A	A	A	B	A	B	A
380	*SWU10056	-	-	A	A	B	B	A	A	A	B	B	B	A	A	B	A	B	B	A	A	A	A	A	B	A	B	A	B	A	A	B	A	A	A	B	B	B	A	A	B	B	A	A	A	B	A	B	A
381	*SWU10060	-	A	-	A	B	B	-	A	A	B	B	B	A	A	B	A	B	B	A	A	A	A	A	B	A	B	A	-	A	A	B	A	A	A	B	B	B	A	A	B	B	A	A	A	B	-	B	A
382	*SWU10062	-	A	A	A	B	B	A	A	A	B	B	B	A	A	B	A	B	B	A	A	A	A	A	B	A	B	A	B	A	A	B	A	A	A	B	B	B	A	A	B	B	A	A	A	B	A	B	A
383	*SWU10064	B	A	A	A	A	B	A	B	B	B	A	A	B	A	B	B	A	A	A	A	B	A	A	B	B	B	B	A	B	A	A	A	B	-	A	A	B	B	B	B	A	A	A	B	B	A	A	A
384	*SWU10067	B	A	B	A	A	B	A	B	B	B	B	A	B	A	B	B	A	A	A	A	B	A	A	B	B	B	B	A	A	A	A	A	B	B	A	A	B	B	B	B	A	A	A	B	B	A	A	-
385	*SWU10094	B	A	A	A	B	A	B	B	A	B	B	B	A	A	B	A	B	A	A	A	A	A	A	B	A	B	A	B	B	A	B	A	A	A	B	B	B	A	A	B	A	B	A	B	B	A	B	B
386	*SWU10205	-	A	A	A	B	B	A	A	B	A	A	B	A	B	B	B	B	A	B	A	A	A	A	A	B	B	B	A	B	B	B	A	B	B	A	A	A	A	B	A	B	B	B	B	B	B	A	A
387	*SWU10214	B	A	B	B	A	B	B	A	A	A	A	A	B	A	A	A	A	A	A	A	B	A	B	B	A	B	B	A	B	A	B	B	A	-	B	B	A	A	A	B	B	B	A	A	B	A	B	B
388	*SWU10266	-	A	-	B	A	A	B	A	B	A	A	B	B	A	B	B	B	A	A	A	B	A	B	B	B	B	A	B	B	A	B	B	A	A	A	B	A	A	A	B	B	A	A	A	B	A	B	B
389	*SWU10627	B	B	A	A	A	B	A	A	A	B	B	B	B	B	B	A	A	A	A	A	A	A	B	B	B	B	A	A	A	B	A	B	A	B	A	A	A	A	B	B	B	A	B	A	B	A	B	B
390	*SWU10785	B	B	A	A	B	A	B	B	B	A	A	B	A	A	B	B	B	B	A	A	B	A	A	B	A	B	A	A	A	A	A	A	B	B	A	A	A	B	A	B	A	A	B	A	B	A	A	A
391	*SWU10800	-	A	B	B	A	B	B	B	B	A	A	B	A	B	A	B	B	A	A	A	B	A	A	A	A	B	A	A	B	A	B	A	B	B	B	B	A	B	B	A	A	A	B	B	B	A	B	B
392	*SWU10864	-	A	A	A	A	B	-	A	B	A	A	A	A	B	B	A	A	B	A	B	B	A	A	B	A	A	B	A	B	B	B	-	B	B	A	B	B	A	A	B	A	A	B	B	B	B	B	B
393	*SWU10912	-	B	A	A	B	A	A	A	A	B	B	B	A	B	A	B	A	B	B	A	A	A	A	B	B	A	A	A	A	A	B	A	-	-	B	A	B	A	B	B	A	B	B	B	A	B	-	A
394	*SWU10930	A	B	-	A	A	A	A	A	A	B	B	B	A	B	A	B	A	B	-	A	A	A	A	B	B	A	A	A	A	A	B	A	A	A	A	A	B	B	B	B	A	B	B	-	A	B	B	B
395	*SWU10954	-	B	A	A	A	A	A	B	A	B	B	B	A	B	A	B	A	B	B	B	B	A	B	B	B	A	A	A	B	A	B	B	A	A	B	A	B	A	B	B	A	A	B	B	A	B	B	B
396	*SWU10959	-	B	-	A	A	A	A	B	A	B	B	B	A	B	A	B	A	B	B	B	B	A	B	B	B	A	A	A	B	B	B	-	A	B	B	A	B	A	B	B	A	A	B	B	A	B	B	A
397	*SWU10986	B	B	-	A	A	A	A	-	A	B	B	B	A	A	-	B	A	B	B	A	-	B	B	B	B	A	A	A	B	B	A	-	A	A	B	A	A	B	B	B	A	A	A	B	A	B	B	-
398	*SWU10987	B	B	B	A	A	A	A	B	A	B	B	B	A	A	-	B	A	B	B	A	-	B	B	B	B	A	A	A	B	B	A	B	A	A	B	A	A	B	B	B	-	A	A	B	A	B	B	B
399	*SWU10994	A	A	A	A	A	A	A	A	A	A	A	B	A	B	-	B	B	A	A	B	-	B	A	A	A	B	B	B	A	B	B	A	B	B	B	B	B	B	A	A	B	A	B	B	B	A	A	A
400	*SWU11013	B	A	-	A	B	B	-	A	B	A	B	B	A	A	-	B	A	B	A	B	-	B	A	A	B	B	A	A	A	A	B	A	A	A	B	B	A	A	A	B	B	B	B	A	B	A	A	A
401	*SWU11038	A	B	-	A	A	A	A	A	A	A	A	B	A	B	-	A	B	A	B	B	-	-	A	A	B	B	B	B	B	B	B	-	B	B	B	B	B	B	A	A	B	A	B	A	B	A	A	A
402	*SWU11191	A	A	A	A	A	B	-	A	A	B	A	A	A	A	B	B	A	B	A	B	B	-	A	B	B	B	A	B	B	B	A	A	A	A	A	A	B	B	A	B	A	A	A	A	B	B	B	A
403	*SWU11204	A	A	A	A	A	B	A	A	A	-	A	A	B	A	-	B	A	B	A	A	-	A	A	B	B	B	A	B	B	B	A	A	A	A	A	A	B	B	A	-	A	A	A	B	B	B	-	-
404	*SWU11309	A	-	A	A	A	A	-	A	B	A	B	A	B	A	-	B	A	B	A	A	-	B	B	A	B	B	A	B	B	B	A	-	A	-	A	A	B	A	A	A	A	A	A	B	B	B	B	-
405	*SWU11374	A	B	A	A	A	A	-	A	B	A	B	A	B	A	-	B	B	B	A	A	-	B	B	A	B	B	A	B	B	B	A	B	A	B	A	A	B	B	A	A	B	A	A	-	B	B	A	B
406	*SWU11384	A	A	-	B	A	B	B	A	A	A	A	B	A	A	-	A	A	A	A	B	-	B	B	A	B	B	A	A	A	B	B	B	A	B	A	A	B	B	A	A	B	B	B	B	A	B	A	B
407	*SWU11560	A	A	A	B	A	B	B	A	A	A	A	B	A	A	-	A	A	A	A	A	-	B	B	A	-	A	B	A	A	B	B	B	A	B	A	A	B	B	A	A	B	B	B	B	A	B	A	B
408	*SWU11630	A	A	A	A	B	A	A	A	B	A	B	B	B	A	-	B	A	B	A	B	-	A	A	A	B	B	A	B	B	B	B	A	B	B	A	A	A	B	B	A	A	A	B	A	-	-	A	A
409	*SWU11632	A	A	B	B	B	B	-	A	A	A	A	A	A	A	-	A	A	A	A	A	-	B	B	A	-	B	-	A	A	A	-	-	B	-	A	A	-	B	A	A	-	-	A	A	A	-	A	B
410	*SWU11691	A	B	A	A	B	A	A	A	B	A	B	B	B	A	-	A	B	B	A	A	-	A	A	B	B	B	A	B	B	B	A	A	A	B	A	A	B	B	B	A	B	B	B	-	B	B	-	A
411	*SWU11794	A	A	B	B	B	B	B	B	B	A	B	A	B	B	-	B	B	B	B	B	-	-	B	B	B	A	A	-	A	A	A	B	B	A	A	A	B	B	A	B	A	A	A	A	B	B	B	B
412	*SWU11855	A	B	A	A	B	A	B	A	A	B	B	A	A	B	-	A	B	A	B	A	-	-	B	B	B	A	B	B	B	A	A	B	A	B	B	A	A	A	B	B	A	B	A	A	A	A	B	B
413	*SWU11887	B	A	A	B	A	A	B	B	B	A	B	B	A	B	B	A	A	B	A	A	-	B	B	B	A	B	B	A	B	A	B	A	A	A	A	A	A	A	A	A	B	B	B	B	B	B	B	A
414	*SWU11889	B	A	-	B	A	A	B	B	B	A	B	B	A	B	B	A	A	B	A	A	A	B	B	B	B	B	B	A	A	A	B	B	A	B	A	A	A	A	A	A	B	B	B	B	B	B	B	-
415	*SWU11950	B	A	-	B	A	A	B	A	A	A	B	A	A	A	B	B	A	A	A	A	B	A	B	B	B	B	B	A	B	A	B	B	B	B	B	B	A	A	A	A	A	A	B	B	B	B	B	B
416	*SWU11976	B	A	B	B	A	A	B	A	B	A	B	A	A	A	B	B	A	A	A	A	B	A	B	A	A	A	B	A	B	A	B	B	B	A	B	B	A	B	B	B	A	A	B	B	B	B	B	A
417	*SWU12016	A	A	B	B	-	-	B	A	B	A	A	A	A	A	B	B	A	A	A	A	B	B	B	A	A	A	B	B	B	A	B	B	B	-	B	-	A	B	B	A	B	B	B	B	B	B	B	B
418	*SWU12025	-	A	B	A	B	B	B	B	B	A	B	B	A	A	B	B	A	B	A	B	B	B	A	B	B	B	A	A	A	A	B	B	A	B	B	B	A	A	A	B	B	B	B	A	B	A	A	A
419	*SWU12107	-	A	B	B	B	B	B	B	A	A	B	B	B	B	A	B	B	B	A	B	A	B	B	A	B	A	A	A	B	B	A	B	B	B	B	B	A	A	A	A	A	A	A	A	A	A	B	A
420	*SWU12126	B	A	B	A	A	B	A	A	B	A	B	B	A	A	B	B	A	B	A	B	B	B	A	B	A	B	A	A	A	A	B	A	B	-	B	B	A	A	A	B	B	B	B	A	B	A	A	A
421	*SWU12147	-	A	A	A	A	B	A	A	B	A	B	B	A	A	B	B	A	B	A	B	B	B	A	A	B	B	A	A	A	A	B	A	A	-	B	B	A	A	A	B	B	B	B	A	B	A	A	A
422	*SWU12250	A	A	-	A	A	A	A	A	A	A	B	B	A	B	B	B	B	B	A	B	A	A	B	-	A	B	A	B	A	B	A	B	A	B	B	B	B	A	B	B	B	A	A	A	A	A	-	A
423	*SWU12282	A	B	-	A	A	A	-	A	A	A	B	B	A	B	B	B	B	B	A	B	A	A	B	B	A	B	A	B	A	B	A	B	A	-	B	B	B	A	B	B	B	A	A	A	A	A	A	A
424	*SWU12343	B	B	B	B	B	B	B	B	A	A	B	B	B	B	A	B	B	B	A	B	B	A	B	A	B	A	A	A	B	B	B	B	B	A	B	B	B	A	A	B	A	A	A	A	A	A	B	B
425	*SWU12393	B	A	A	A	A	B	A	A	B	A	B	B	B	A	B	B	A	B	A	B	B	B	A	A	B	B	A	A	A	A	B	A	A	A	B	B	B	A	A	B	B	B	B	B	B	A	A	A
426	*SWU12490	B	A	A	A	B	B	-	A	B	A	B	B	A	A	B	B	A	B	A	B	-	B	A	A	B	B	A	A	A	A	B	A	A	-	B	B	A	A	A	B	B	B	B	-	B	-	A	A
427	*SWU1259	A	A	-	B	B	A	B	A	A	B	B	B	A	-	B	B	B	B	A	A	A	B	A	B	B	B	A	B	B	A	A	A	A	A	A	A	B	A	A	B	A	A	A	A	B	A	A	B
428	*SWU12672	A	B	B	B	B	B	A	B	A	A	A	A	A	A	A	B	B	B	A	A	A	B	A	A	A	A	A	A	B	B	A	A	A	A	A	A	A	B	B	A	A	A	B	A	B	A	A	A
429	*SWU12732	-	A	-	A	A	A	A	B	B	B	B	A	A	B	A	B	A	A	A	B	A	A	B	B	A	B	A	A	A	B	B	B	B	B	B	A	B	A	A	B	A	B	B	B	B	B	B	-
430	*SWU12765	B	B	B	B	B	B	-	A	B	A	A	B	A	A	A	B	A	B	A	B	A	B	A	A	B	B	B	A	A	B	B	A	A	-	A	B	B	A	A	A	B	B	A	A	A	A	A	B
431	*SWU12783	B	B	B	A	B	B	A	B	B	B	B	B	B	B	B	B	A	B	B	B	A	B	B	B	A	B	A	A	A	B	B	B	B	B	B	A	B	A	A	A	A	A	B	B	B	B	B	A
432	*SWU12818	B	B	A	A	A	B	A	B	B	B	A	A	A	B	B	A	A	B	A	B	A	B	B	A	A	B	A	A	A	B	A	B	B	-	B	A	B	A	A	A	A	A	B	B	-	B	B	B
433	*SWU12819	-	A	B	B	B	B	B	A	B	B	A	B	A	A	A	B	A	B	B	B	A	B	A	A	B	B	A	B	A	A	B	A	A	A	A	B	B	A	A	B	B	B	A	A	A	A	B	B
434	*SWU12838a	B	-	A	A	A	B	-	B	B	B	A	B	A	B	B	A	A	B	A	B	A	B	B	A	A	B	A	A	A	B	A	B	B	B	B	A	B	A	A	A	A	A	B	B	B	B	B	A
435	*SWU12838b	B	B	B	B	B	B	-	B	B	B	A	B	A	A	A	B	A	B	B	B	A	B	A	A	A	B	A	A	A	A	B	A	A	-	A	B	B	A	A	B	B	B	A	B	B	A	B	B
436	*SWU12840	B	A	B	B	B	B	A	B	B	B	A	B	A	A	A	B	A	B	B	B	A	B	A	A	A	B	A	A	A	A	B	-	A	-	A	B	B	A	A	B	B	B	A	B	B	A	B	B
437	*SWU12841	B	A	B	B	B	B	B	B	B	B	A	B	A	A	A	B	A	B	B	B	A	B	A	A	A	B	A	A	A	A	B	A	A	B	A	B	B	A	A	B	B	B	A	B	B	A	B	B
438	*SWU12872	-	A	B	B	B	B	-	B	A	A	B	B	B	A	A	B	-	A	A	B	A	A	A	A	A	A	A	B	A	A	B	-	A	-	A	B	B	A	A	B	A	A	-	B	B	A	B	B
439	*SWU12876	A	A	B	B	B	B	B	B	A	A	B	B	B	A	A	B	A	A	A	B	A	A	A	A	A	A	A	B	A	A	B	A	A	A	A	B	B	A	A	B	A	A	A	B	B	A	B	A
440	*SWU12976	A	A	B	A	A	A	B	B	A	A	B	B	B	A	B	A	B	B	A	A	B	A	A	A	B	A	A	B	A	B	A	A	A	B	B	B	B	B	B	A	B	B	B	B	B	A	A	B
441	*SWU13032	-	A	B	B	B	B	B	A	B	A	B	A	A	B	A	A	B	A	A	A	B	A	A	A	A	B	A	A	B	A	A	A	B	A	B	B	A	B	A	A	A	A	A	A	B	A	B	B
442	*SWU13083	A	B	B	B	A	A	B	B	B	B	A	B	B	A	A	A	A	A	A	A	A	B	B	A	B	A	A	A	B	A	A	A	B	B	B	B	B	A	A	A	A	B	B	A	A	A	B	A
443	*SWU13133	B	A	-	A	A	A	A	A	B	B	B	B	B	A	A	B	B	A	A	A	A	A	A	A	B	B	A	B	B	A	A	A	A	B	A	A	B	A	A	A	A	B	B	A	B	B	A	-
444	*SWU13150	B	A	-	A	A	A	A	A	B	B	B	B	B	A	A	B	B	A	A	A	A	B	A	A	B	B	A	B	B	A	A	A	A	-	A	A	B	A	A	A	A	B	B	A	B	B	A	-
445	*SWU13256	A	A	A	A	A	A	A	A	B	B	B	A	B	A	A	B	B	A	A	A	A	B	A	B	B	A	A	B	B	A	A	A	A	A	A	A	B	A	A	A	A	B	B	A	B	B	B	B
446	*SWU13267	B	A	-	A	A	A	A	A	B	B	B	A	B	A	A	B	B	A	A	A	A	B	A	B	B	A	A	B	B	A	A	A	A	-	A	A	B	A	A	A	A	B	B	A	B	B	B	B
447	*SWU13268	-	A	A	A	A	A	A	A	B	B	B	A	B	A	A	B	B	A	A	A	A	A	A	B	B	A	A	B	B	A	A	A	A	B	A	A	B	A	A	A	A	B	B	A	B	B	B	A
448	*SWU13378	B	B	A	A	B	A	B	A	A	A	A	B	A	A	B	B	A	B	B	A	A	A	A	B	B	B	B	B	A	A	B	A	B	B	A	B	B	A	A	B	B	A	A	A	A	A	B	B
449	*SWU13514	A	B	A	A	A	B	A	A	A	B	B	B	B	B	B	A	A	A	A	A	B	A	B	B	B	B	A	B	A	B	A	B	A	A	A	A	A	A	B	B	B	A	B	A	B	A	B	B
450	*SWU13736	A	A	-	A	B	A	A	A	B	B	B	A	A	A	B	B	A	A	B	A	B	B	B	A	A	A	B	A	A	B	-	-	A	-	A	A	A	A	A	A	A	A	B	A	A	A	B	B
451	*SWU13745	-	-	-	A	B	A	-	A	B	B	B	A	A	A	B	B	A	A	B	A	B	B	B	A	A	A	B	A	A	B	-	B	A	-	A	A	A	A	A	A	A	A	B	A	A	B	B	A
452	*SWU13758	A	A	-	A	B	A	-	A	B	B	B	A	A	A	B	B	A	A	B	A	B	B	B	A	A	A	B	A	A	B	-	B	A	B	A	A	A	A	A	A	A	A	B	A	A	B	B	B
453	*SWU13824	B	B	B	B	B	B	B	A	B	A	A	A	A	A	A	A	B	A	B	B	B	B	B	A	B	B	A	B	B	B	B	B	B	-	A	B	B	A	A	B	A	B	A	A	A	B	B	B
454	*SWU13829	B	B	A	B	-	-	B	B	B	B	-	B	A	A	B	A	A	A	B	A	B	B	A	B	A	B	B	B	A	B	A	A	A	-	B	B	B	B	A	B	B	A	B	B	-	B	B	A
455	*SWU13909	A	A	A	A	B	A	A	A	A	A	B	B	A	B	A	B	A	A	B	B	B	B	B	B	A	B	B	A	B	B	B	B	A	B	A	A	B	A	B	B	A	A	A	B	B	A	B	A
456	*SWU14060	B	B	B	B	B	A	B	B	B	A	B	B	A	B	A	B	B	B	B	B	B	A	B	A	B	B	A	A	B	B	A	B	B	A	B	B	A	B	-	B	A	A	A	B	A	A	B	B
457	*SWU14077	A	B	A	B	A	B	A	B	A	B	B	A	A	B	-	A	A	A	-	A	A	B	A	A	A	A	A	A	B	A	B	A	B	B	B	A	B	B	B	A	B	A	A	A	B	B	A	A
458	*SWU14224	-	-	-	B	B	B	-	A	B	A	A	A	A	A	A	A	B	A	B	B	B	B	B	A	B	B	A	B	B	B	B	B	B	B	A	B	B	A	A	B	A	B	A	A	A	B	B	A
459	*SWU14431a	A	B	A	A	B	A	A	B	A	B	A	B	A	A	A	B	-	A	B	B	B	B	B	B	A	A	A	B	A	A	A	B	B	B	A	B	B	B	A	B	A	B	B	A	B	B	B	A
460	*SWU14431b	-	A	A	B	A	A	B	A	B	A	A	A	B	B	A	A	-	A	B	A	A	B	A	A	B	B	B	B	A	B	A	A	B	A	B	-	B	B	A	B	A	A	B	B	A	A	A	B
461	*SWU14535	-	-	-	B	B	B	-	A	A	A	A	A	A	B	A	A	A	A	B	A	B	B	B	A	B	B	A	B	A	B	B	B	B	A	B	B	B	A	B	B	A	A	A	A	A	A	A	A
462	*SWU14539	A	B	B	B	B	B	B	-	A	A	A	A	A	B	A	A	A	A	B	A	B	B	B	A	B	B	A	B	A	B	B	B	B	A	B	B	B	A	B	B	A	A	A	A	A	A	B	A
463	*SWU14542	-	-	-	B	B	B	-	A	A	A	A	A	A	B	A	A	A	A	B	A	B	B	B	A	B	B	A	B	B	B	B	B	B	A	B	B	B	A	B	B	A	A	A	A	A	A	B	A
464	*SWU14543	A	B	B	B	B	B	B	A	A	A	A	A	A	-	A	A	A	A	B	A	A	B	B	A	B	B	B	B	A	B	B	B	B	B	B	B	B	A	A	B	A	A	A	A	A	A	B	A
465	*SWU14545	A	-	-	B	B	B	B	A	A	A	A	A	A	B	A	A	A	A	B	B	B	B	B	A	B	B	A	-	A	B	B	B	B	-	B	B	B	A	B	B	A	A	A	A	A	A	B	A
466	*SWU14627	A	A	B	B	B	-	A	B	A	A	B	B	B	B	A	B	B	B	A	B	A	A	A	A	A	A	B	A	A	B	A	A	A	-	B	A	A	A	B	A	B	B	A	B	A	B	A	B
467	*SWU14628	B	B	A	A	A	A	A	A	B	B	A	A	A	A	B	A	A	A	B	A	B	-	B	B	-	B	A	B	B	A	B	B	B	A	A	B	B	B	A	B	A	A	B	A	B	A	B	A
468	*SWU14761	B	A	B	B	B	B	B	B	A	B	A	B	A	A	B	B	B	A	A	B	B	B	A	B	A	A	B	B	A	B	B	A	B	B	B	B	B	B	A	B	A	A	A	A	B	B	A	A
469	*SWU14770	A	B	A	A	A	A	A	A	A	B	B	A	A	A	A	A	A	B	A	B	-	A	A	B	B	B	B	A	B	A	A	A	A	A	A	B	B	A	A	A	A	A	B	A	A	B	A	A
470	*SWU14807	A	B	-	A	-	A	A	B	B	A	B	A	A	A	A	A	B	B	A	B	B	A	A	B	B	B	B	A	B	A	A	A	A	A	A	A	B	A	A	A	B	A	B	A	A	B	A	A
471	*SWU14934	-	A	A	A	B	A	A	A	B	B	B	A	A	A	A	B	B	B	A	A	B	B	B	A	A	B	B	B	B	A	A	B	A	A	A	B	A	B	A	B	B	A	B	B	B	A	B	B
472	*SWU15157	B	B	-	A	B	A	-	A	B	B	A	A	A	A	A	B	A	A	A	A	B	B	A	A	A	B	B	A	A	A	A	A	A	-	A	B	A	B	B	B	A	A	B	B	B	A	B	B
473	*SWU15194	B	A	-	B	A	B	B	B	A	B	B	A	A	A	B	A	-	B	B	B	A	A	A	A	B	A	A	B	B	B	A	A	A	A	B	B	A	B	A	A	B	B	B	A	B	B	-	A
474	*SWU15407	A	B	-	B	B	B	B	B	A	A	B	A	A	A	B	B	B	A	B	A	A	A	A	A	A	B	B	B	A	B	B	A	A	A	A	A	B	B	B	B	A	A	B	B	B	B	A	B
475	*SWU15413	A	B	-	B	B	B	B	B	A	A	B	A	A	A	B	B	B	A	B	A	A	A	A	A	A	B	B	B	A	B	B	A	A	-	A	A	B	B	B	B	A	A	B	B	B	B	B	B
476	*SWU15511	B	B	B	B	B	A	B	-	A	A	B	A	A	A	B	B	B	B	B	A	A	A	B	A	A	B	A	B	B	B	B	-	B	B	A	A	A	B	B	A	A	A	B	B	A	A	B	B
477	*SWU15517	B	B	B	B	B	A	B	A	A	A	B	A	A	A	B	B	B	B	B	A	A	A	B	A	A	B	A	B	B	B	B	B	B	A	A	A	A	B	B	A	A	A	B	B	A	A	B	B
478	*SWU15733	-	A	B	B	B	A	B	A	A	B	A	A	B	A	B	B	B	B	B	B	B	B	A	A	A	B	B	B	A	B	B	A	A	A	B	A	B	A	A	B	A	A	A	A	A	B	A	B
479	*SWU15915	-	B	B	A	A	A	A	B	A	B	A	B	A	A	A	B	A	A	A	B	B	B	B	A	A	A	A	B	A	A	A	B	B	B	A	B	B	B	A	B	A	B	B	A	B	A	A	B
480	*SWU15972	-	A	A	A	A	-	-	B	A	A	-	A	A	B	A	B	B	A	A	B	A	A	B	A	A	-	B	B	B	B	A	B	B	-	B	B	B	B	B	B	B	A	A	-	-	A	-	-
481	*SWU16138	-	B	A	A	B	A	A	A	B	B	A	B	B	B	A	A	A	A	A	B	B	B	A	B	A	A	A	B	B	A	A	-	B	-	A	B	A	B	B	B	A	A	B	-	B	B	B	A
482	*SWU16269	A	A	A	A	A	A	A	A	A	A	B	B	A	B	B	B	B	B	A	B	A	A	B	B	A	B	A	B	A	B	A	B	A	A	B	B	B	A	B	B	B	A	A	A	A	A	A	A
483	*SWU16281	A	A	-	A	A	A	-	A	A	A	B	B	A	B	B	B	B	B	A	B	A	A	B	B	A	B	A	B	A	B	A	B	A	-	B	B	B	A	B	B	B	A	A	A	A	A	A	A
484	*SWU16487	A	B	B	B	A	A	B	B	B	B	B	B	A	A	A	B	B	A	A	A	A	B	B	B	B	A	A	B	B	A	A	B	B	B	A	B	A	B	A	B	A	A	B	A	B	B	A	B
485	*SWU16488	A	B	B	B	A	A	A	B	B	B	B	B	A	A	A	B	B	A	A	A	A	B	B	B	A	A	A	B	B	A	A	B	B	B	A	B	A	B	A	B	A	A	B	A	B	B	B	A
486	*SWU16489	A	B	B	B	A	A	-	B	B	B	B	B	A	A	A	B	B	A	A	A	A	B	B	B	A	A	A	B	B	A	A	B	B	A	A	B	B	B	A	B	A	A	B	A	B	B	A	B
487	*SWU16569	A	B	A	A	B	B	A	B	B	A	B	B	B	A	A	B	B	-	B	A	B	B	B	A	A	B	B	B	B	B	A	B	B	-	A	B	A	B	B	A	A	A	B	A	B	A	A	B
488	*SWU16573	A	-	A	A	B	B	A	B	B	A	B	B	B	A	A	B	B	-	B	A	A	B	B	A	A	B	B	B	B	B	A	-	B	-	A	B	A	B	B	A	A	A	B	A	B	A	A	B
489	*SWU16576	A	B	A	A	B	B	A	B	B	A	B	B	B	A	-	B	B	A	B	A	A	B	B	A	A	B	B	B	B	B	A	B	B	-	A	B	A	B	B	A	A	A	B	A	B	A	A	B
490	*SWU16645	A	A	A	A	A	B	A	B	B	B	B	B	A	A	A	B	B	A	A	A	B	B	B	A	B	B	B	B	B	B	A	B	A	B	A	B	A	B	B	A	A	A	B	B	A	A	A	A
491	*SWU16649	A	B	A	A	A	B	A	B	B	B	B	B	A	A	A	B	B	A	A	A	B	B	B	A	B	B	B	B	B	B	A	B	A	B	A	B	A	B	B	A	A	A	B	B	B	A	A	A
492	*SWU16651	A	B	A	A	A	B	A	B	B	B	B	B	A	A	A	B	B	A	A	A	B	B	B	A	B	B	B	B	B	B	A	B	A	B	A	B	A	B	B	A	A	A	B	B	B	A	A	A
493	*SWU16676	A	A	B	A	A	A	A	B	B	B	A	B	B	B	B	A	B	-	B	A	B	A	B	B	A	B	B	A	A	A	A	B	B	B	A	A	B	B	A	A	B	B	A	B	A	A	A	B
494	*SWU16753	B	A	B	B	A	A	B	A	B	A	B	A	A	B	A	A	A	A	B	A	A	A	B	B	A	B	B	A	B	A	A	B	B	A	A	B	A	B	A	A	B	B	A	B	B	A	A	A
495	*SWU16755	B	A	B	B	A	A	-	A	B	A	B	A	A	B	A	A	A	A	B	A	A	A	B	B	A	B	B	A	B	A	A	B	B	A	A	B	A	B	A	A	B	B	A	B	B	A	-	B
496	*SWU16777	B	A	A	B	A	A	A	A	B	A	B	A	A	B	A	A	A	A	B	A	A	A	B	B	A	B	B	A	B	A	A	A	A	A	A	B	A	B	A	B	B	A	A	B	B	A	A	A
497	*SWU16778	B	A	B	B	A	A	-	A	B	A	B	A	A	B	A	A	A	A	B	A	A	A	B	B	A	B	B	A	B	A	A	B	A	A	A	B	A	B	A	B	B	A	A	B	B	A	-	A
498	*SWU16780	B	A	-	B	A	A	-	A	B	A	B	A	A	B	A	A	A	A	B	A	A	A	B	B	A	B	B	A	B	A	A	-	A	A	A	B	A	B	A	B	B	-	A	B	B	A	-	-
499	*SWU16781	A	B	B	B	A	B	B	-	A	B	A	A	A	B	A	A	B	B	B	A	B	A	A	B	A	A	A	B	B	B	A	A	A	A	B	A	A	A	A	A	B	B	A	A	B	B	B	A
500	*SWU16782	A	B	B	B	A	B	B	B	A	B	A	A	A	B	A	A	B	B	B	A	B	A	A	B	A	A	A	B	B	B	A	A	A	A	B	A	A	A	A	A	B	B	A	A	B	B	B	A
501	*SWU16783	A	B	A	B	A	B	A	A	A	B	A	A	A	B	A	A	B	B	B	A	B	A	A	B	A	A	A	B	B	B	A	A	A	A	B	A	A	A	A	A	B	B	A	A	B	B	B	A
502	*SWU17233	A	A	A	A	B	A	A	B	B	B	B	A	A	A	A	A	A	A	B	B	A	A	B	B	A	B	A	A	B	B	A	-	A	A	A	B	A	B	A	B	B	B	A	B	B	A	A	-
503	*SWU17241	A	A	A	A	B	A	A	B	B	B	B	A	A	B	A	A	A	A	B	B	A	A	B	B	A	B	A	A	B	B	A	B	A	A	A	B	A	B	A	B	B	B	A	B	B	A	A	B
504	*SWU17251	A	A	A	A	B	A	A	B	B	B	B	A	A	B	A	A	A	A	B	B	A	A	B	B	A	B	A	A	B	B	A	B	A	A	A	B	A	B	A	B	B	B	A	B	B	A	A	B
505	*SWU17257	A	A	A	A	B	A	A	B	B	B	B	A	A	B	A	A	A	A	B	B	A	A	B	B	A	B	A	A	B	B	A	B	A	A	A	B	A	B	A	B	B	B	A	B	B	A	A	B
506	*SWU17336	A	B	B	B	B	A	B	B	B	B	B	A	A	B	A	A	A	A	B	B	A	B	B	B	A	A	A	A	A	B	B	B	B	B	A	B	B	B	A	B	A	A	A	A	A	A	B	A
507	*SWU17395	A	B	B	B	B	A	-	A	B	B	B	A	A	B	A	A	A	A	B	B	A	B	B	B	A	A	A	A	A	A	B	-	B	B	A	B	B	B	A	B	A	A	A	A	A	A	A	-
508	*SWU17419	A	B	B	A	B	A	A	A	B	B	B	A	A	A	A	A	A	A	B	B	A	A	B	B	A	A	A	A	A	A	B	B	B	B	A	B	B	B	A	B	A	A	A	A	A	B	A	B
509	*SWU17432	A	B	B	A	B	A	A	A	B	B	B	A	A	A	A	A	A	A	B	B	A	A	B	B	A	A	A	A	A	A	B	B	B	B	A	B	B	B	A	B	A	A	A	A	A	B	A	A
510	*SWU17467	A	A	B	B	B	A	-	A	B	B	B	A	A	A	A	A	A	B	B	B	A	A	B	B	A	A	A	B	A	A	B	-	B	B	A	A	B	B	A	B	A	A	A	B	A	B	A	B
511	*SWU17713	B	B	A	A	A	A	-	A	A	A	B	B	B	A	B	A	B	A	A	A	B	A	A	B	A	A	B	A	A	A	A	A	B	B	A	A	B	B	B	A	B	B	A	A	A	B	B	B
512	*SWU17715	B	B	A	A	A	A	A	A	A	A	B	B	A	A	B	A	B	A	A	A	A	A	A	B	A	A	B	A	A	A	A	A	B	B	A	A	B	B	B	A	B	B	A	A	A	B	B	B
513	*SWU17717	B	B	A	A	A	A	A	A	A	A	B	B	B	A	B	A	B	A	A	A	B	A	A	B	A	A	B	A	A	A	A	A	B	B	A	A	B	B	B	A	B	B	A	A	A	B	B	B
514	*SWU17781	B	A	A	A	A	A	A	A	A	A	B	B	A	A	B	B	B	B	B	A	B	A	A	B	B	A	B	A	A	A	A	A	B	B	A	A	B	B	B	B	B	B	A	A	A	B	B	B
515	*SWU17782	B	A	B	B	A	A	A	B	A	A	A	A	A	A	A	A	B	A	A	A	B	A	B	A	A	B	B	B	A	B	B	B	B	-	B	A	B	B	A	B	A	A	B	B	B	B	B	B
516	*SWU17787	B	B	A	A	A	A	A	A	A	A	B	B	A	A	B	B	B	B	B	A	B	A	A	B	B	A	A	A	A	A	A	A	B	B	A	B	B	B	B	B	B	B	A	-	A	B	B	B
517	*SWU17846	B	B	B	A	B	A	B	A	A	A	A	B	A	A	A	B	A	B	B	A	B	A	A	B	B	B	B	B	A	A	B	A	B	B	A	B	B	A	A	B	B	A	A	A	A	B	B	B
518	*SWU17882	B	A	B	B	A	A	B	A	B	A	A	A	B	B	A	A	A	A	B	A	A	B	A	A	B	B	B	B	A	B	A	A	B	B	B	A	B	B	A	B	A	A	B	B	A	A	B	B
519	*SWU17897	B	A	A	A	A	A	A	A	B	A	A	A	B	B	A	A	A	A	B	A	A	B	A	A	B	B	B	B	A	B	A	A	B	B	B	A	-	B	B	B	A	A	B	B	A	A	B	B
520	*SWU17990	B	A	A	A	A	B	A	A	B	B	A	A	A	B	A	A	A	A	B	B	A	A	B	A	A	B	B	A	A	B	A	B	B	A	B	B	A	B	B	B	A	A	B	B	B	A	B	B
521	*SWU17991	B	A	A	A	A	B	A	A	B	B	A	A	A	B	A	A	A	A	B	B	A	A	B	A	A	B	B	A	A	B	A	B	B	A	B	B	A	B	B	B	A	A	B	B	B	A	B	B
522	*SWU18015	B	A	A	A	A	B	A	A	B	B	A	A	A	B	A	A	A	A	B	A	A	A	B	A	A	B	B	A	A	B	A	B	B	A	B	B	A	B	B	B	A	A	B	B	B	A	B	B
523	*SWU18223	A	A	-	B	B	A	B	B	A	A	-	A	B	A	B	B	A	A	A	B	A	A	B	A	A	A	A	B	B	B	A	-	B	B	B	A	B	B	B	A	A	A	B	B	B	B	A	B
524	*SWU18488	B	A	B	B	A	A	A	A	B	B	B	B	A	B	A	B	A	A	A	B	A	A	B	B	A	B	B	A	B	A	A	B	B	B	A	A	A	B	B	A	B	B	A	A	A	B	A	B
525	*SWU18672	B	A	A	B	A	B	B	A	B	B	B	B	B	B	A	B	A	A	A	A	A	A	A	B	A	A	B	A	B	A	B	A	A	A	A	B	A	B	B	A	B	B	A	A	A	A	B	B
526	*SWU18681	B	A	B	B	A	B	B	A	B	B	B	B	A	B	A	B	A	A	A	A	A	A	A	B	A	B	B	A	B	A	B	A	A	A	A	A	A	B	B	B	B	-	A	A	A	A	B	-
527	*SWU18697	B	A	B	B	B	B	A	A	B	A	B	B	B	B	A	B	A	A	A	A	A	B	A	B	A	B	B	A	A	A	B	A	A	B	A	B	A	A	B	B	B	B	A	A	A	A	A	A
528	*SWU18698	B	A	B	B	B	B	A	A	B	A	B	B	B	B	A	B	A	A	A	A	A	B	A	B	A	B	B	A	A	A	B	A	A	B	A	B	A	A	B	B	B	B	A	A	A	A	B	A
529	*SWU18876	A	B	B	B	B	B	-	B	A	A	B	A	A	A	A	A	B	B	A	A	A	B	A	A	B	A	A	B	B	B	A	A	A	A	A	A	A	B	B	A	A	A	B	A	B	A	A	B
530	*SWU18881	A	B	B	B	B	B	B	B	A	A	B	A	A	A	A	A	B	B	A	A	A	B	A	A	A	A	A	A	B	B	A	B	A	B	A	A	A	B	B	A	A	A	B	-	B	A	A	B
531	*SWU18919	B	A	B	B	B	A	B	A	B	A	B	B	B	B	A	B	A	A	A	A	B	B	A	A	A	B	B	A	A	A	B	A	B	B	A	B	B	A	B	B	B	B	A	A	A	A	B	A
532	*SWU18959	A	B	A	A	B	A	A	B	B	A	B	A	B	A	A	B	A	A	B	B	A	A	B	B	A	A	B	A	B	A	A	A	B	A	A	A	B	A	A	B	B	B	B	A	B	A	A	A
533	*SWU19129	B	B	-	B	B	B	B	B	A	B	A	B	B	A	B	A	A	B	B	B	A	B	B	B	B	A	A	A	A	B	A	B	A	B	A	A	B	A	A	A	B	B	A	A	A	A	B	B
534	*SWU19144	B	B	A	B	B	B	B	B	A	B	A	B	B	A	B	A	A	B	B	B	A	B	B	B	B	A	A	A	A	B	A	B	A	B	A	A	B	A	A	A	B	B	A	A	A	A	B	B
535	*SWU19184	B	B	-	A	A	B	-	A	A	A	A	B	A	A	B	B	B	A	B	B	A	A	A	A	A	B	A	B	B	B	B	A	A	B	B	A	B	A	A	A	A	A	A	A	A	B	A	-
536	*SWU19249	B	A	A	A	A	A	-	A	A	A	A	B	A	A	B	B	B	A	B	B	A	A	A	A	A	B	A	B	B	B	B	A	A	B	B	A	A	A	A	A	A	A	A	A	A	B	A	B
537	*SWU19411	B	B	B	B	A	B	B	-	A	B	A	B	B	A	B	A	A	B	B	A	A	B	A	A	A	B	A	A	B	-	A	A	B	-	A	A	B	A	A	A	A	A	A	B	A	A	B	B
538	*SWU19412	B	B	B	B	A	B	B	B	A	B	A	B	B	A	B	A	A	B	B	A	A	B	A	A	A	B	A	A	B	A	A	A	B	A	A	A	B	A	A	A	A	A	A	B	A	A	B	B
539	*SWU19413	B	B	B	B	A	B	B	B	A	B	A	B	B	A	B	A	A	B	B	A	A	B	A	A	A	B	A	A	B	A	A	-	B	A	A	A	B	A	A	A	A	A	A	B	A	A	B	B
540	*SWU19416	B	B	B	B	A	B	B	B	A	B	A	B	B	A	B	A	A	B	B	A	A	B	A	A	A	B	A	A	B	A	A	A	B	A	A	A	B	A	A	A	A	A	A	B	A	A	B	B
541	*SWU19430	B	B	B	B	A	B	B	B	A	B	A	B	B	A	B	A	A	B	B	A	A	B	A	A	A	B	A	A	B	A	A	A	B	A	A	A	B	A	A	A	A	A	A	B	A	A	B	B
542	*SWU19431	B	B	-	B	A	B	B	B	A	B	A	B	B	A	B	A	A	B	B	A	A	B	A	A	A	B	B	B	B	A	A	A	B	A	A	A	B	A	A	A	A	A	A	B	A	A	B	-
543	*SWU19434	B	B	B	B	A	B	B	B	A	B	A	B	B	A	B	A	A	B	B	A	A	B	A	A	A	B	A	A	B	A	A	A	B	A	A	A	B	A	A	A	A	A	A	B	A	A	B	B
544	*SWU19541	A	A	A	A	B	B	A	A	B	A	A	B	B	A	B	B	B	A	B	A	A	A	A	A	A	A	A	B	B	B	B	A	A	B	B	A	B	B	A	B	A	A	A	A	A	B	A	B
545	*SWU19606	B	A	B	A	B	B	B	A	B	A	A	B	B	A	B	B	B	A	B	A	A	A	A	A	A	A	A	B	B	B	B	A	A	B	B	B	B	B	A	B	A	A	A	A	A	B	B	B
546	*SWU19654	-	-	-	A	B	B	-	A	B	A	A	B	B	A	B	B	B	A	B	A	A	A	A	A	A	A	A	B	B	B	B	A	A	B	B	B	B	B	B	B	A	A	A	A	A	B	A	B
547	*SWU19656	A	A	A	A	B	B	A	A	B	A	A	B	B	A	B	B	B	A	B	A	A	A	A	A	A	A	A	B	B	B	B	A	A	B	B	B	B	B	B	B	A	A	A	A	A	B	A	A
548	*SWU19763	B	B	A	B	A	A	B	B	A	B	B	B	A	B	-	B	A	A	B	B	A	B	A	B	A	B	A	B	B	B	A	A	A	A	A	A	B	A	A	B	A	A	A	B	A	A	B	B
549	*SWU19815	B	B	A	B	A	B	B	B	A	A	B	B	A	B	A	B	B	B	A	B	A	A	A	B	B	A	A	B	A	B	A	A	B	B	A	A	B	B	A	B	A	A	A	A	B	A	B	A
550	*SWU19848	B	B	B	B	A	B	B	A	A	A	B	A	A	B	B	B	B	A	A	B	A	B	A	B	B	B	A	-	A	A	A	A	B	B	A	A	A	B	A	B	A	A	A	B	B	A	B	B
551	*SWU19888	B	A	A	A	-	B	A	A	B	A	B	B	-	A	A	A	B	A	B	B	-	A	B	B	A	B	B	A	-	A	A	B	B	B	B	A	A	A	B	A	A	A	A	A	A	B	B	A
552	*SWU20033	A	A	B	B	B	A	B	A	A	B	B	B	A	A	A	B	B	B	A	A	A	B	A	B	B	B	A	B	B	A	A	A	A	A	A	B	B	A	A	B	A	A	A	A	-	A	A	B
553	*SWU20035	A	A	B	B	B	A	B	A	A	B	B	B	A	A	A	B	B	B	A	A	A	B	A	B	B	B	A	B	B	A	A	A	A	A	A	B	B	A	A	B	A	A	A	A	B	A	A	B
554	*SWU20064	A	A	B	B	B	A	B	-	A	B	B	B	A	A	B	B	B	B	A	A	A	B	A	-	B	B	A	B	B	A	A	A	A	A	A	A	B	A	A	B	A	A	A	A	B	A	A	B
555	*SWU20246	B	A	-	A	B	B	-	B	B	A	A	B	B	A	B	B	B	A	B	A	B	A	A	A	A	A	A	B	B	A	A	-	B	A	B	A	B	A	A	B	A	A	B	A	B	B	A	A
556	*SWU20260	A	B	A	B	A	B	B	B	B	A	A	A	A	A	A	A	B	A	A	B	B	B	A	A	A	B	B	B	B	A	B	A	B	-	B	A	A	A	B	B	B	B	A	A	B	B	A	B
557	*SWU20341	A	B	A	A	A	B	-	A	A	B	B	B	B	B	B	A	A	A	A	A	B	A	B	B	B	B	A	B	A	B	A	B	A	B	A	A	A	A	B	B	A	A	B	A	B	A	B	B
558	*SWU20501a	A	A	-	A	B	-	A	B	B	B	A	B	B	A	A	B	B	A	B	A	B	A	B	B	A	A	A	B	A	A	A	B	B	A	B	A	B	A	A	B	A	A	A	A	B	B	A	A
559	*SWU20501b	B	B	A	A	A	A	A	B	A	A	A	B	A	B	A	B	B	A	A	B	B	B	A	A	A	B	B	B	A	A	B	A	B	B	A	A	A	B	B	A	B	B	A	B	B	B	A	B
560	*SWU20511	B	B	A	A	A	A	A	B	A	A	A	B	A	B	A	B	B	A	A	B	B	B	A	A	A	B	B	B	A	A	B	A	B	B	A	A	A	B	B	A	B	B	A	B	B	B	A	B
561	*SWU20636	B	B	A	B	A	A	A	B	A	A	A	B	B	B	A	B	A	B	B	A	B	A	B	A	B	B	B	-	A	B	B	B	B	B	B	A	A	B	A	B	B	A	B	B	B	A	A	B
562	*SWU20649	B	B	-	B	A	B	-	B	A	A	A	B	A	B	A	B	A	B	B	B	A	A	B	A	B	B	B	A	A	B	B	B	B	B	B	A	A	B	A	A	B	A	B	B	B	B	A	B
563	*SWU20675	B	B	A	B	A	B	A	B	A	B	A	B	A	B	A	B	A	B	A	A	A	A	B	A	B	B	B	A	A	B	B	B	B	B	B	A	A	B	A	A	B	A	A	B	B	B	B	B
564	*SWU20689	B	A	-	B	-	B	B	-	A	A	A	B	A	B	A	B	A	B	A	A	B	B	B	A	-	B	B	B	A	B	B	A	-	A	B	-	A	A	B	-	B	B	B	B	B	A	A	A
565	*SWU20700	B	B	B	B	A	B	B	B	A	B	A	B	A	B	A	B	A	A	A	A	A	B	B	A	B	B	B	A	A	B	B	B	B	B	B	A	A	B	A	B	B	A	A	B	B	B	B	B
566	*SWU20813	A	A	A	B	B	A	B	A	B	B	A	A	A	B	B	A	B	A	B	B	A	B	B	A	B	B	A	B	B	A	A	A	B	A	B	A	B	B	B	A	B	A	A	A	-	B	B	-
567	*SWU20913	A	A	B	B	B	B	B	B	B	A	B	B	A	B	B	A	B	B	B	B	A	A	B	A	B	B	A	B	A	B	A	B	B	B	B	B	B	B	A	B	A	B	A	B	B	B	A	B
568	*SWU20914	A	A	B	B	B	B	B	B	A	A	B	B	A	A	B	A	B	B	B	B	A	A	B	A	B	B	A	A	A	B	A	B	B	-	A	B	B	A	A	B	A	B	A	B	B	A	A	B
569	*SWU20917	A	A	B	B	B	B	B	B	A	A	B	B	A	A	B	A	B	B	B	B	A	A	B	A	B	B	A	A	A	B	A	B	B	-	A	B	B	A	A	B	A	B	A	B	B	A	A	B
570	*SWU21415	A	B	-	B	A	A	-	B	A	A	B	A	A	B	A	A	A	B	B	A	A	A	A	B	A	B	A	A	B	A	A	A	B	-	B	B	A	A	B	A	A	B	B	A	A	B	A	A
571	*SWU21485	A	B	B	B	A	B	B	B	A	A	B	A	B	B	A	A	A	B	B	A	A	B	A	B	-	B	A	A	B	B	A	A	A	A	B	A	A	A	B	A	A	B	B	A	A	B	B	B
572	*SWU21533	B	B	-	B	-	A	B	A	A	B	A	A	A	A	A	A	A	B	B	A	B	A	B	B	A	A	A	A	A	B	A	B	A	-	B	B	B	A	A	A	A	A	B	B	A	A	A	B
573	*SWU21538	B	B	A	B	A	A	B	A	A	B	A	A	A	A	A	A	A	B	B	A	B	A	B	B	A	A	A	A	A	B	A	-	A	A	B	B	-	A	A	A	A	A	B	B	A	A	A	B
574	*SWU21585	A	B	A	B	A	A	B	-	A	A	A	A	B	A	B	-	A	B	A	A	B	A	A	B	A	A	A	A	B	B	B	A	B	B	B	B	B	A	A	A	A	A	A	B	A	A	B	A
575	*SWU21586	A	B	A	B	A	A	B	A	A	A	A	A	B	A	-	A	A	B	A	A	B	A	A	B	A	A	A	A	B	B	B	A	B	B	B	B	B	A	A	A	A	A	A	B	A	A	B	A
576	*SWU21617	B	B	B	B	B	A	B	A	A	B	B	B	A	B	B	A	B	A	A	B	B	A	A	B	B	A	A	B	B	A	A	A	A	A	A	A	B	A	B	A	A	A	A	A	B	A	B	B
577	*SWU21635	A	B	B	B	A	A	B	A	A	A	B	A	B	A	B	A	B	B	A	A	B	B	A	B	A	A	A	A	A	B	A	B	B	A	B	B	B	A	-	B	B	A	A	B	A	A	B	B
578	*SWU21646	A	B	-	B	A	A	B	A	A	A	B	A	B	A	B	A	B	B	A	A	B	B	A	B	A	B	A	A	A	B	A	A	B	A	B	B	B	A	A	B	B	A	A	B	A	A	B	B
579	*SWU21718	A	A	A	-	A	A	A	A	A	B	B	B	-	A	B	A	A	B	B	A	A	B	A	B	A	A	A	B	A	-	A	A	A	A	A	-	B	B	B	B	A	A	B	B	A	A	A	A
580	*SWU21800	B	A	B	B	B	B	B	A	A	B	A	B	A	B	B	A	A	A	B	A	B	B	B	A	A	B	B	A	B	B	B	B	A	A	B	B	B	B	A	A	B	B	A	B	A	A	A	B
581	*SWU22187	A	B	A	A	A	B	A	A	B	B	A	B	B	A	A	A	A	B	A	A	B	A	B	A	A	B	B	A	B	B	B	B	A	B	B	A	B	B	A	B	B	A	B	A	A	A	A	A
582	*SWU22192	A	B	A	A	A	B	A	A	B	B	A	B	B	A	A	A	A	B	A	A	B	A	B	A	A	B	B	A	B	B	B	B	A	B	B	A	B	B	A	B	B	A	B	A	A	B	-	B
583	*SWU22281	A	B	A	A	A	B	-	A	B	B	A	B	B	A	B	A	A	B	A	A	B	A	B	A	B	A	B	A	B	B	B	B	A	B	B	A	B	A	A	A	B	A	B	A	A	B	A	B
584	*SWU22287	A	B	A	A	A	B	A	A	B	B	A	B	B	A	B	A	A	B	A	A	B	A	B	A	B	A	B	A	B	B	B	B	A	B	B	A	B	A	A	A	B	A	B	-	A	B	-	B
585	*SWU22290	A	B	A	A	A	-	A	A	B	B	A	B	B	A	B	A	A	B	A	A	B	A	B	A	B	A	B	A	B	B	B	B	A	B	B	A	B	A	A	A	B	A	A	A	B	A	A	-
586	*SWU22309	A	A	-	-	B	-	-	-	B	A	A	A	A	B	A	A	B	A	A	A	B	A	-	A	A	-	A	A	B	A	-	A	B	A	B	-	B	-	A	B	-	A	B	A	-	B	-	B
587	*SWU22324	A	A	B	-	B	B	B	A	B	A	B	A	A	B	A	A	B	A	A	A	B	A	A	A	A	B	A	A	B	A	A	A	B	A	B	B	A	B	A	A	A	A	A	A	B	A	B	A
588	*SWU22338	A	A	B	B	B	B	-	A	B	A	A	B	A	A	A	A	B	A	-	A	A	A	A	A	A	B	A	A	B	A	A	A	B	A	B	B	B	A	A	B	A	A	A	B	B	A	B	A
589	*SWU22339	A	A	B	B	B	B	B	A	B	A	A	B	A	A	A	A	B	A	B	A	A	A	A	A	A	B	A	A	B	A	A	A	B	A	B	B	B	A	A	B	A	A	A	B	B	A	B	A
590	*SWU22374	-	A	B	B	-	-	B	A	B	A	A	B	A	B	-	A	B	B	B	-	A	A	A	A	A	B	A	A	B	A	A	A	B	A	B	B	B	A	A	B	A	A	A	B	B	A	B	-
591	*SWU22413	A	A	B	B	B	A	A	A	B	B	B	B	B	B	B	A	A	-	-	A	A	A	A	A	B	-	-	A	B	A	A	B	B	-	B	-	B	A	B	B	A	A	A	B	B	B	-	B
592	*TMB0071	A	A	A	A	B	A	A	A	A	A	B	B	A	B	A	B	A	A	B	B	B	B	B	A	A	B	B	A	B	B	B	B	A	B	A	A	B	A	B	B	A	A	A	B	B	A	A	A
593	*TMB0107	B	A	A	A	A	A	A	A	A	B	A	A	A	B	A	A	A	A	B	A	A	B	A	A	B	B	B	B	A	B	A	A	B	A	B	A	B	B	B	B	A	A	B	B	B	A	B	B
594	*TMB0628	A	A	-	A	A	A	A	A	A	A	B	B	A	B	B	B	B	B	A	B	A	A	B	B	A	B	A	B	A	B	A	B	A	B	B	B	B	A	B	B	B	A	A	A	A	A	A	A
595	*TMB1268	B	A	A	B	A	A	B	A	A	A	B	A	A	A	B	B	A	A	A	A	B	A	B	B	-	B	B	A	B	A	B	B	B	B	B	B	A	A	A	A	A	A	B	B	B	B	B	B
596	*TMB1296	B	B	-	A	A	A	-	A	A	A	B	B	B	A	B	A	B	A	A	A	B	A	A	B	A	A	B	A	A	A	A	A	B	B	A	A	B	B	B	A	B	B	A	A	A	B	B	B
597	*TMB1638	A	A	A	A	A	A	A	A	A	B	B	B	A	A	B	A	A	B	B	A	A	B	A	B	A	A	A	B	A	B	A	A	A	A	A	B	B	B	B	B	A	A	B	B	A	A	A	A
598	*TMB2386	-	B	B	B	B	B	B	B	B	B	B	A	B	A	A	A	B	B	A	A	B	A	A	A	B	B	A	A	B	A	A	A	A	A	B	B	B	A	A	B	A	A	A	B	A	B	B	B
599	*TMB2940	-	-	-	A	B	B	-	A	B	A	A	B	B	A	B	B	B	A	B	A	A	A	A	A	A	A	A	B	B	B	B	A	A	B	B	A	B	B	A	B	A	A	A	A	-	B	A	B
600	*ICR00010	A	B	A	-	B	-	B	A	-	B	B	B	A	A	B	B	B	B	A	-	A	A	A	-	A	B	B	B	A	B	B	B	B	-	-	B	-	-	-	-	-	-	B	-	B	-	B	B
601	*ICR00016	B	B	A	A	B	B	B	B	B	B	B	B	B	A	B	B	B	B	A	A	B	A	A	B	A	B	B	B	B	A	B	A	-	B	-	-	B	A	A	B	B	A	A	-	B	A	B	B
602	*ICR00093	B	B	A	-	A	A	A	B	A	A	A	B	A	A	A	A	B	A	B	B	B	B	A	A	A	B	B	B	B	A	B	A	B	A	B	A	A	B	B	B	B	B	A	A	B	B	A	B
603	*ICR00121	A	A	B	B	B	A	A	A	A	A	B	A	B	A	B	A	A	B	B	B	B	A	B	A	A	A	B	B	B	B	B	A	A	B	B	B	B	B	B	B	B	B	B	B	B	A	A	A
604	*ICR00142	B	B	B	B	B	B	B	B	B	B	B	B	B	B	B	B	B	B	A	A	A	B	B	B	B	A	A	A	A	A	B	B	B	B	-	A	A	A	B	B	B	B	A	-	B	B	B	B
605	*ICR00143	A	B	A	-	B	B	A	A	B	A	A	B	B	A	A	B	B	B	A	A	B	A	A	B	B	B	A	B	B	A	A	A	B	B	B	B	B	B	B	B	A	B	B	B	B	B	A	A
606	*ICR00307	A	A	A	A	-	B	B	A	A	B	B	A	-	A	B	A	B	A	A	A	-	A	A	A	A	A	A	B	B	A	B	B	A	A	A	B	B	A	A	A	A	A	B	A	A	A	A	A
607	*ICR00417	A	B	B	-	B	B	B	A	A	A	A	A	A	B	A	A	A	A	B	A	B	B	B	A	B	B	A	B	A	B	B	B	B	A	B	B	B	A	B	B	A	A	A	A	A	A	B	A
608	*ICR00500	B	B	B	A	B	B	-	A	A	A	A	A	B	A	B	B	A	B	A	A	A	A	A	B	A	B	-	-	A	A	A	-	A	A	-	A	A	B	A	A	A	A	B	A	B	A	A	A
609	*ICR00647	-	B	A	A	A	B	-	A	A	-	B	B	B	B	-	A	A	A	A	A	B	A	B	B	B	B	A	B	A	B	A	B	A	B	A	A	A	B	B	B	B	A	B	A	B	A	B	B
610	*ICR01320	A	A	A	B	A	B	B	A	A	A	A	B	A	A	B	A	A	A	B	A	A	B	B	A	B	A	B	A	A	A	B	B	A	B	A	A	B	B	A	A	B	B	B	B	A	B	A	B
611	*ICR01566	A	B	A	A	A	B	A	A	A	A	A	A	B	-	B	A	A	A	A	A	A	A	A	B	A	B	A	B	A	A	A	A	A	A	A	A	A	A	A	A	A	A	B	A	B	A	A	A
612	*ICR01638	B	A	B	B	B	B	B	B	A	B	B	B	A	B	B	A	B	B	A	A	A	A	B	A	B	B	A	A	B	A	B	B	B	B	A	B	B	B	A	B	A	A	A	B	B	B	A	B
613	*ICR01729	A	B	B	B	A	B	B	B	A	A	B	A	B	B	B	A	A	B	B	A	A	B	A	B	B	A	A	A	B	B	A	A	A	B	-	A	A	A	B	A	A	B	B	B	A	B	B	B
614	*ICR01787	B	A	B	A	A	-	A	B	B	B	A	A	B	B	A	A	B	A	B	A	A	B	B	B	A	A	A	A	A	A	B	B	A	B	A	B	A	A	A	A	A	A	B	A	B	A	A	B
615	*ICR01810	-	A	B	A	A	A	A	A	B	B	A	A	B	B	A	A	B	A	B	A	A	B	B	B	A	A	A	A	A	A	B	B	A	B	-	B	A	A	A	A	A	B	B	A	B	A	B	B
616	*ICR01834	-	A	B	A	A	A	A	A	A	A	B	A	A	A	A	A	A	A	A	B	A	A	A	A	A	A	A	A	A	A	A	A	A	B	A	B	A	A	A	A	B	A	A	A	B	A	A	A
617	*ICR01949	B	A	B	B	B	B	-	A	A	B	B	B	A	A	A	A	B	B	A	A	A	A	B	A	B	B	A	A	B	B	B	B	B	B	B	B	B	B	A	B	A	A	A	B	B	-	A	B
618	*ICR02258	B	A	A	B	A	B	B	B	B	B	A	A	A	A	A	A	A	A	A	B	A	A	B	B	B	A	B	B	B	B	B	B	B	A	-	B	B	A	A	A	B	A	B	-	B	B	B	A
619	*ICR02589	B	B	B	B	A	A	A	B	A	A	B	A	A	A	A	A	B	B	B	B	B	B	A	B	A	B	A	A	A	A	A	A	A	A	A	A	A	A	A	A	A	A	A	A	B	B	B	B
620	*ICR02737	B	A	-	A	B	B	A	A	B	A	A	B	B	A	B	B	B	A	B	A	A	A	A	A	A	A	A	B	B	B	B	A	A	B	B	A	B	B	A	B	A	A	A	A	A	B	A	A
621	*ICR02849	A	A	B	B	A	B	A	A	B	A	A	B	A	B	A	B	B	A	A	A	B	A	A	A	A	B	A	A	B	A	B	A	B	A	B	B	A	B	B	A	A	A	B	A	B	A	B	B
622	*ICR02862	A	A	A	A	A	A	A	B	A	A	A	A	B	A	A	B	A	B	A	A	B	B	A	-	A	A	A	A	A	A	B	A	B	A	-	A	A	A	A	A	A	A	B	A	A	A	A	A
623	*ICR03107	-	-	-	-	-	-	-	-	-	-	-	-	-	-	-	-	-	-	-	-	-	-	-	B	A	B	B	A	B	A	B	B	B	A	-	B	B	A	A	B	A	A	A	-	A	B	B	A
624	*ICR03206	A	A	B	B	B	B	A	B	B	A	B	A	A	A	A	B	B	B	A	A	A	A	A	A	A	A	A	B	B	A	A	A	A	A	B	B	B	B	B	A	A	A	A	A	A	A	B	A
625	*ICR03295	A	B	A	A	A	A	A	A	A	B	B	B	A	B	A	B	A	B	B	A	A	A	A	B	B	A	A	A	A	A	B	A	A	B	B	A	B	A	B	B	A	B	B	B	A	B	B	B
626	*ICR03391	B	B	B	B	B	B	B	B	B	B	B	B	A	B	B	B	B	B	A	B	A	B	B	A	A	A	A	A	A	B	A	B	A	B	B	A	B	A	A	A	A	A	B	B	B	B	B	B
627	*ICR03724	A	B	A	A	A	A	A	B	A	B	B	B	A	A	A	B	A	B	B	A	B	B	B	B	B	A	A	A	B	B	B	B	A	B	B	A	A	B	B	B	A	A	B	-	A	B	B	B
628	*ICR03725	A	B	A	A	A	A	A	B	A	B	B	B	A	A	A	B	A	B	B	A	B	B	B	A	B	A	A	A	B	B	B	A	A	B	-	A	A	B	B	A	A	A	B	B	A	B	B	B
629	*ICR03943	B	B	A	B	B	B	B	B	B	B	B	A	B	B	B	B	B	A	A	A	A	B	B	B	B	B	B	B	B	A	B	B	B	A	A	A	A	B	B	B	B	B	B	A	A	B	B	B
630	*ICR04408	A	A	-	A	B	B	A	A	A	B	-	B	A	-	-	-	A	B	-	-	-	B	A	B	A	B	-	-	A	A	B	A	A	-	-	-	-	A	-	A	A	-	-	-	-	B	A	B
631	*ICR04705	A	A	A	A	A	B	A	A	B	A	A	A	B	A	A	B	A	B	A	A	B	A	B	A	B	A	B	A	B	B	B	B	A	B	-	B	B	A	A	A	B	B	A	A	B	A	A	B
632	*ICR05924	A	A	A	A	B	B	A	A	B	A	A	B	B	A	B	B	B	A	B	A	A	A	A	A	A	A	A	B	B	B	B	A	A	B	-	A	B	B	A	B	A	A	A	A	A	A	A	B
633	*ICR07050	A	B	A	B	A	B	-	-	-	A	A	A	A	A	-	A	B	A	A	B	B	B	A	A	A	B	B	B	B	A	B	A	B	A	B	A	A	B	B	B	B	B	A	A	B	A	A	B
634	*ICR07393	B	A	A	A	B	B	A	-	A	B	A	A	B	-	B	A	A	-	A	B	A	A	B	B	B	B	B	A	A	B	B	B	B	B	-	A	B	B	B	B	B	A	A	-	B	A	A	A
635	*ICR08245	-	A	B	B	A	A	B	A	B	-	A	B	B	B	B	B	B	A	A	A	B	B	B	A	A	B	A	A	A	A	A	B	A	B	-	B	A	A	A	A	B	B	B	B	B	B	A	A
636	*ICR08249	B	A	B	B	B	A	B	A	A	B	A	A	B	A	B	B	B	B	B	B	B	B	A	A	A	B	B	B	A	B	B	B	A	A	-	A	B	A	A	B	A	A	A	A	A	B	A	A
637	*ICR10177	B	A	A	A	B	B	A	A	B	-	A	B	B	A	B	B	B	A	B	A	A	B	A	A	A	B	B	A	A	B	B	A	A	B	-	B	B	B	A	B	A	A	A	A	A	B	A	B
638	*ICR10227	B	A	A	A	A	A	A	A	B	B	B	B	A	A	A	B	B	B	B	B	A	B	B	A	B	B	A	A	A	A	A	A	A	B	B	B	A	B	B	B	A	A	A	B	A	B	B	B
639	*ICR10344	A	A	A	A	A	A	A	A	A	A	B	B	A	B	B	B	A	A	A	B	A	A	B	B	A	B	A	A	A	A	B	A	A	-	A	A	A	B	B	B	B	A	A	-	A	A	A	A
640	*ICR10602	A	B	A	-	B	B	A	A	B	A	A	B	B	A	B	B	B	A	B	-	-	A	A	A	A	A	-	-	-	B	B	A	A	-	-	-	-	-	B	B	A	A	-	-	A	B	A	B
641	*ICR10808	B	A	B	A	B	B	B	A	B	A	-	B	B	A	B	B	B	A	B	A	A	A	A	A	A	A	A	B	B	B	B	-	A	B	-	A	B	B	A	B	A	A	A	A	A	B	A	B
642	*ICR10853	-	-	-	A	B	B	A	A	-	A	-	-	-	A	B	B	B	A	-	A	A	A	A	A	-	A	-	B	B	B	B	A	A	-	-	A	B	B	A	B	-	-	A	-	A	B	A	A
643	*ICR10890	B	A	-	A	B	B	A	A	B	A	A	B	B	A	B	B	B	A	B	A	A	A	A	A	A	A	A	B	B	B	B	A	A	B	-	B	B	B	A	B	A	A	A	A	A	B	A	B
644	*ICR11064	A	A	B	B	B	-	A	B	A	A	B	B	B	B	A	B	B	B	A	B	A	B	-	A	B	A	A	A	B	B	A	B	B	A	-	B	A	A	A	A	A	A	A	A	A	A	B	A
645	*ICR11205	A	A	B	B	B	B	A	A	A	-	-	A	-	-	A	B	B	B	A	A	A	B	B	A	B	B	B	B	B	A	B	B	B	A	-	A	A	B	A	A	B	B	A	-	A	B	A	B
646	*ICR11559	A	A	B	B	A	B	B	A	A	A	-	-	B	A	-	A	A	A	A	A	A	B	B	A	B	A	-	A	A	A	B	B	A	B	-	A	B	B	A	A	B	B	B	-	A	B	-	-
647	*ICR11883	A	A	B	B	A	B	B	A	A	A	A	B	A	A	B	-	A	A	A	A	A	B	B	A	B	A	B	A	A	A	B	B	A	B	-	A	B	B	A	A	B	B	B	B	A	B	-	B
648	*ICR11884	B	A	A	A	A	A	A	B	A	B	B	A	B	B	B	B	A	B	B	A	A	B	B	B	A	A	B	B	B	A	A	B	B	B	-	A	B	A	A	A	A	A	B	B	A	A	A	A
649	*ICR11885	B	A	A	B	A	B	B	A	A	A	A	B	A	A	B	A	A	A	A	A	A	B	-	A	B	-	B	A	A	A	B	B	A	B	-	A	B	B	A	A	B	B	B	B	A	B	A	A
650	*ICR11957	A	A	-	B	A	B	B	A	A	A	A	B	A	A	B	A	A	A	A	A	A	B	B	A	B	A	B	A	A	A	B	B	A	B	-	A	B	B	A	A	B	B	B	-	A	B	A	B
651	*ICR12037	A	B	B	-	-	B	B	-	A	A	A	A	A	B	A	A	A	A	B	A	B	B	B	A	B	B	A	B	A	B	B	B	B	A	-	B	B	A	-	B	A	A	A	A	A	A	B	A
652	*ICR12130	A	A	A	A	A	B	A	B	A	B	B	A	B	A	A	B	B	B	A	A	B	A	A	B	B	A	B	A	A	A	A	A	A	B	-	B	A	A	B	B	A	A	A	B	B	B	B	A
653	*ICR12228	A	A	A	A	A	B	A	B	A	B	B	B	B	B	A	-	B	B	B	A	A	A	A	B	B	A	A	A	A	A	A	A	A	-	-	B	B	A	B	B	A	A	A	A	A	B	A	A
[truncated: 129 more columns]

## Sheet: RIL trait
	E1	E1	E1	E1	E1	E2	E2	E2	E2	E2
Num	t1	t2	t3	t4	t5	t1	t2	t3	t4	t5
1	33.44	53.75	87.94	107.13	115.25	26.19	43.46	78.08	105.5	111
2	32.81	51.06	83.81	100.69	106.56	23.25	39.06	73.13	100.94	105.94
3	36	56.63	93.06	110.38	117.44	26.44	44.88	78.94	99.13	100.94
4	33.38	53.81	90.25	111.38	121.63	25.63	43.88	76.06	105.25	114
5	28.25	45.25	79.19	99.63	106.06	23	40.75	75.13	101.81	109.56
6	29.13	48.31	85.88	108.5	117.06	24.13	41.38	78.38	105.88	114.38
7	30.13	48.75	82.31	103.19	109.06	26.25	43.88	77.31	100.31	105.63
8	38.75	60.88	99.19	124.06	133.81	30.44	50	84.25	116.5	123.75
9	41.56	61.69	105.63	126.25	133.94	30.81	50.31	87.94	111.88	116.94
10	36.19	59.63	101.94	120.13	128.31	25.38	44.13	79.75	101.63	106
11	37.63	57.69	90.44	105.13	112.25	26.75	44.25	76.5	95.69	99.88
12	28.94	49.19	84.41	103.38	109.19	24.5	41.69	73.13	93.75	97.56
13	27.88	44.44	82.31	104.44	114.25	21.31	37.06	69.06	94.06	99.81
14	38.63	57.06	94.06	113.5	124.5	29.25	47.19	81.13	106.88	113.38
15	30.13	48.06	83.78	106.5	117.25	22	38.31	68.19	94.56	99.02
16	35.81	55.75	92.38	112.31	123.63	25	41.69	74.75	101.4	105.22
17	32.81	54.44	93.91	107.94	116	22.13	39.56	71.38	96.44	99.06
18	31.81	51.19	90.63	104.56	112.13	24.44	42.19	75.75	98.69	103.63
19	32.19	50	89.81	105.69	118.69	22.63	38.69	70.63	99.31	107.63
20	30.94	51.06	90.5	104.88	114.13	23.13	41.63	75.5	102.69	108.88
21	33.56	56.63	96.94	111.69	118.81	26.19	46.56	83.63	114.69	118.87
22	29.13	46.63	85.13	101.69	112	22.44	37.75	70.19	101	106.31
23	30.38	48	86.38	100.25	112.69	22.31	35.63	64.31	90.25	92.38
24	28.44	42.13	76.88	89.75	102.94	21.25	34	60.75	81.19	86.25
25	39.69	59.56	102.75	115.75	128.69	27.44	45.44	80.69	107.19	114
26	37.13	59.25	98.63	114.05	124.75	29.02	48.81	84.81	111.19	118.31
27	31.94	49.19	84.97	99.31	107.19	28.38	47.19	82.88	106.25	112.75
28	30.75	50.06	91.56	108.81	119.81	22.81	41	78.69	108.19	114.63
29	34.38	57.13	98.25	115.63	126.13	27.25	47.56	83.81	112.69	120.13
30	33.69	58.31	97.34	111.31	120.75	24.63	44.81	79.94	106.38	108.19
31	31.63	51.25	92.19	112.94	125.5	22.06	37.63	69.94	94.25	98.5
32	31.25	51.63	87.31	106.56	115.44	22.44	39.44	70.56	96.69	100.69
33	31.56	51.06	86.56	112.06	122.31	27.13	48.88	81.44	111.31	113.75
34	28.63	46.75	83.75	105.38	113.19	21.5	37.44	71.25	98.5	102.88
35	35.63	60.19	103.88	125.5	134.81	27.06	47.19	84.13	116.56	120.31
36	31.06	51.94	88.19	111.13	119.69	21.38	40.25	73.38	98.94	101.5
37	27.5	47.25	81.13	101.75	106	18.94	34.19	64.19	87.06	88.81
38	29.88	50.75	86.81	106.31	113.88	18.5	30.88	57.92	78.47	80.31
39	35.25	52.38	86.06	106.88	116.75	19.81	32.44	63.31	85.23	86.07
40	40.94	67.25	104.59	120.06	127.31	24	42.25	77.38	103.19	107.63
41	35.63	55.75	88.19	102.81	110.56	25	43.56	77.94	97.81	100.88
42	40.31	64.81	102.56	118.5	127.69	27.88	48.69	87.5	115.56	122.38
43	38.44	61.75	103.47	120.88	128.75	27.19	48.69	85.19	109.13	113.69
44	33.5	50.75	87.63	108.56	115.06	26.38	41	73.81	99.19	102
45	41	64.69	100.94	117.06	123.94	28.88	49.56	87.75	113.06	117.63
46	37	58.63	96.91	116.25	122.38	26.63	43.75	76.19	102.19	108.19
47	35.75	57.13	93.44	109.69	118.44	27	42.44	73.63	98.06	102.19
48	39	61.13	96	113.75	122.44	25.69	45.06	79.63	107.69	113.56
49	33.06	53.13	90.66	111	119.94	22.63	38.56	71.75	100.69	104.81
50	34.75	55.38	90.75	105.88	113.25	26.19	45	77.56	96.81	100.19
51	31.38	52.38	91.06	111	119.44	21.06	42.5	82.13	111.13	116.33
52	33.88	51.88	90.19	112.75	122	23.5	41.69	77.44	104.88	113.36
53	36.81	57.75	93.31	116.94	127	27.38	49	87.75	115.06	120.81
54	31.56	50.63	90.31	111.5	120.06	23.19	43.56	81.31	109.38	116.06
55	28.94	46.31	84.88	106.94	115.94	20.56	38.31	72.13	97.56	103.81
56	28.56	47.54	83.97	104.72	115.11	26	46.06	83.56	107.13	112.25
57	32.13	50.19	85.94	108.13	116.38	21.56	39.25	73.5	97.88	105.63
58	32.31	52.19	86.38	106.19	112.19	26.06	43.69	75.75	98.94	104.19
59	27.75	47.19	84.38	104	108.44	26.13	44.88	78.56	100.25	103.79
60	27.5	45.13	86.84	109.13	119.19	21	40.81	77	104.81	111.8
61	26.56	40.88	76.5	91.56	99.63	24.25	41.38	73.38	97.5	102.13
62	32.75	51	92.5	106.5	114.31	23.75	42.56	79.5	104.25	110.88
63	30.5	49.06	89.38	102.5	109.75	23.63	43.31	84.44	109	112.19
64	24.88	40.44	75.56	91.25	99.5	26.06	48.75	83.94	103.06	110.19
65	29.88	49.44	86.94	102.19	108.25	28	49.31	84.5	107.63	112.44
66	32.88	54.38	92.19	103.38	109.13	26.44	47.06	81.31	101.38	105.63
67	21.5	37.88	71.53	83.56	92.63	22.69	42.75	77.06	99.56	104.06
68	25.25	40.13	77.59	94.88	102.94	21.25	36.56	67.81	97.56	104.31
69	21.69	35.31	74.31	93.5	104.63	22.56	39.75	72.75	98.81	100.56
70	25.94	43.56	86.63	104.69	116.13	20.38	36.81	71.25	97.13	101.38
71	28.5	46.38	80.44	97.44	108.81	24.25	41.75	74.19	93.19	99.69
72	26.69	42.5	80.94	99.31	111.75	24.75	40.19	70.88	96.94	101.94
73	27.38	44.25	81.44	96.44	105.56	19.13	33	60.94	84.44	87.25
74	27.06	41.75	78.84	97.38	106.56	20.06	35.69	64.25	89.69	94.5
75	25	40.69	75.69	94.88	102.81	18.25	32.69	63.94	89.38	93.25
76	27.75	41.44	78.44	94.75	102.31	20.88	36.44	66.56	88.88	95.94
77	34.81	53.56	88.56	109	119.5	23.31	39.25	69.13	90.44	93.56
78	31.44	50.81	83.16	104.81	113.81	23.56	39.75	67.13	86.19	88.75
79	31.94	51.06	84.44	110.81	118.88	21	38.06	68.75	93.44	96.94
80	30.5	51.13	87.38	111.88	123.31	23.56	42.94	78	103.63	107.31
81	36.13	56.5	92.5	112.5	122.88	26.69	44.25	77.31	102.88	108
82	33.81	53.56	91.63	111.06	119.25	28.19	46.38	78.44	103.31	108
83	32.13	51.63	88.09	109.44	117.5	25.69	43.38	76.5	103.13	108.31
84	29.81	48.75	85.38	108.25	115.88	21.44	40.31	72.25	98.94	103.44
85	40.25	62	97.69	121.13	130.75	28.44	48.19	80.44	100.81	108.38
86	36.63	57.5	93.5	115.56	126.38	26.38	46.38	80.94	108.69	113.44
87	36.44	60.5	95.75	110.88	115.19	26.56	46.13	79.06	104.94	111.63
88	28.63	47.19	86.22	108.94	115.94	24.19	42.69	79.06	103.5	107.75
89	34.19	52.88	84.31	101.44	110.25	25.19	42.69	74.13	95.25	101.19
90	31.13	52.25	87	105.19	113.06	29.06	48.25	85.81	113.19	121.13
91	29.44	46.75	78.81	100	105.81	27.38	46.31	79.94	105	110.69
92	29.44	49.44	82.75	99.06	105.94	24.13	45	79.19	105.06	112.19
93	35.56	57.31	89.88	107.94	116.75	27.75	51.44	86.56	110.69	115
94	33.69	51.31	87.63	111.13	118.31	26.63	44.06	78.31	104.5	111.81
95	31.31	49.06	85.38	107.81	114.75	23.75	41.06	74.19	95.19	100.25
96	28.69	45.69	82	101.5	108.56	26.94	45.25	79.44	98.56	104.94
97	31	54.69	88.88	106.94	113.19	26.38	45.38	77.94	101.63	107.5
98	23.88	39.13	76.25	96.31	104.06	21.5	37.75	70.44	97.5	106.25
99	26.81	45.25	83.84	107.5	120.38	25.88	43.31	77.88	106.56	116.19
100	33	51.5	88	107.88	116.31	30.13	50.06	85.75	110.94	119.81
101	25.81	42.44	78.44	98.06	108.31	25.94	44.88	82.63	109.94	119.81
102	26.31	43.19	85.81	107.63	116.25	25.56	46.94	82.44	104	112.38
103	28.38	46	85.56	108.5	116.44	26.38	45.88	83.13	107.81	113.94
104	30.19	47.56	91.19	114.13	124.38	25.06	45.25	88.06	115.31	124
105	27.38	45.06	77.91	94.69	103.5	28.19	51.69	86.94	106.5	114.06
106	25.63	42.81	79.31	99.13	109.63	28.25	48.31	84.81	112.25	119.94
107	20.99	33.46	68.46	86.42	93.55	23.31	39.75	71.25	95.44	103.69
108	24.56	40.94	78.06	91.19	99.06	29.06	46.81	80.88	107.31	116.19
109	27.06	40.94	75.13	89.94	98.31	23.56	39.81	74.88	97.75	105.75
110	23.19	40.06	75.13	90.13	97.81	29.29	46.81	82.19	108.75	116.63
111	21.44	35.88	69.81	87.44	93.31	29.44	50.94	84.06	107.31	112.88
112	24.13	39.38	71.19	88.06	94.25	28.38	47.06	77.56	103.81	110.56
113	22.88	34.63	68.52	87.7	97.44	26.31	42.31	75.69	105.44	112.13
114	27.81	45.31	80.25	97.38	106.88	25.88	43.13	76.06	98.38	104
115	24	36.94	71.88	92.44	102.5	23.5	39.81	73.25	101.25	109.06
116	25.81	45.13	81.06	99.63	108.5	29.44	47.94	82.5	105.44	113.5
117	28.63	48.06	83.19	102.31	112.63	27.56	47.31	82.81	112.19	121.25
118	30.81	49	84.5	105.19	113.75	27.75	46.25	80.5	105.56	114.13
119	28.63	47.88	86.63	108	117.25	24	43.31	81.19	101.56	105.63
120	31.81	49.69	85.88	107.94	121	27.81	46.94	82.25	105.88	111.44
121	29.69	47.38	83.19	104.56	113.38	24.38	44.13	79.88	102.25	110
122	29.56	47.25	82.75	103.25	108.44	22.63	38.75	70.69	99.56	106.5
123	31.81	47.56	80.25	99.19	102.13	23.75	40.44	72.19	93.5	99.38
124	29.94	46	78.69	97.06	103.38	23.88	38	65.88	89.13	92.81
125	21.69	34.81	65.94	85.75	90.14	18.06	30.94	59.75	83.56	86.06
126	32	48.31	85.25	103.19	110.19	22.31	38	68.5	96.31	101.44
127	27.94	44.44	76	99.88	109.73	22.19	36.13	66.88	97.69	104.31
128	26.75	40.69	72.31	94.88	103.44	19.69	32.38	61.19	87.63	93.13
129	30	45.75	82.06	103.69	114.56	20.44	31.94	62.13	88.25	92.81
130	32.56	50.19	84.28	99.69	109.88	21.5	36.56	67.81	90.88	94.13
131	30.81	47.69	83.19	92.19	98.81	24.88	40.69	71.31	93.31	99.56
132	33.88	53.94	89.63	105.69	112.75	23.5	40.38	73	101.25	106.31
133	34.44	53.75	87.56	103.38	114.38	25.38	41.69	74.69	102.94	106.75
134	31.31	47.88	81.75	97.5	103.56	25.31	43.63	78.38	104.31	108.88
135	28.56	41	67.19	83.06	88.81	18.69	33.31	61.63	83.56	89.69
136	33.63	50.25	79.38	96.88	105.25	24.56	42.69	75.44	100.69	106.19
137	30.5	45.06	76.94	94.5	100.44	23.19	43.19	76.56	97.75	101.63
138	33.63	53	85.69	107.75	114.38	25	44.94	80.13	107.63	111.5
139	32.06	48.56	83.94	107.75	115.88	24	40.38	77.81	101.44	105.75
140	32	49.06	86.81	106.94	114.94	25.63	40.31	76.81	106.56	113.5
141	31.88	45.31	77.94	100.5	107.44	24.56	38.69	72.69	101	106.44
142	35.5	54.06	88.25	110.88	115.38	30	45.81	77.75	100.81	108.69
143	29.44	45.44	81.44	100.75	109.06	23.56	43.38	80.13	105.69	109.25
144	31.19	48.75	81.75	102.31	110.63	25.38	43	74.75	98.63	103.44
145	26.94	43.75	78.25	97.69	106	24.5	40.06	73.88	103.25	108.94
146	24.63	38.44	74	95.88	106.44	24.19	40	71.19	97.56	102.81
147	25.81	40.44	84.5	100.13	109.25	22.88	42.19	81.06	107	111.69
148	26.31	41.63	80.63	99.75	109.75	22.25	38.88	75.88	107	112.81
149	27.19	47	87.63	101.75	108.2	26	45.38	81.13	103.56	112
150	32.44	54.81	93.38	106.38	115.94	27.38	49.38	85.19	114.81	122.69
151	23.69	39	73.75	92.19	101.13	28.13	46.5	81.81	109.69	114
152	24.13	37.31	74.63	95.13	103.63	25.44	40.56	74.25	105.81	116.13
153	27.81	45.13	85.5	104.19	115.63	27.44	45.88	82.69	111.44	123.25
154	21.69	32.82	65.3	79.23	85.14	23.81	42.38	74.63	95.56	100.56
155	26.56	45.44	82.88	96	105.25	24.81	47.94	83.31	105.31	109.42
156	26.38	45.88	81.13	93.75	100	23.81	43.75	74	91.31	97.81
157	23.94	40.63	72.38	91.56	102.56	24.88	42	78.25	104.81	111.94
158	23.7	38.62	69.72	84.75	92.38	26.63	44.75	76.75	102.44	109.38
159	28.44	44.56	84.38	97.63	110.5	21.25	37.81	72.81	101.44	109.63
160	24.81	41.69	80.63	93.63	100.56	27.94	47.81	81.94	105.44	111.69
161	29.56	50.69	93.06	110.38	123.38	23.13	39.88	75.19	108.63	115.69
162	22.44	39.5	73.44	96.31	106.75	22.56	39.63	74	98.06	106
163	23.38	40.81	75.25	94.56	105.85	24	45	79.81	99.56	99.69
164	25.38	44.25	80.06	97.06	105.19	27.44	45.13	84.31	109.38	116.94
165	29.63	50.25	83.19	104.69	111.81	24	42.19	78	105.63	110.88
166	23.94	38.81	72.81	96.63	105.38	21.19	38.5	75.13	102.75	107.75
167	32.69	51.88	87.31	103.19	111.25	24.69	44.44	81.19	103.88	107.88
168	26.94	43.06	77.06	98.5	105.25	21.06	36.81	68.69	91.35	92.63
169	29.63	44.56	73.63	98.38	109.13	23.75	39.92	72.79	99.69	106.19
170	30.56	51.06	82.25	102.94	111.06	24.88	44.56	81.06	101.44	106.81
171	32.25	48.5	80.5	105.38	116.81	24.75	43.06	79.94	111.31	121.38
172	32.25	51	80.5	101	109.63	24.81	44.44	79.88	109.31	114.63
173	27.44	42.44	75.19	97	106.31	22.75	41.13	76	104.38	111.75
174	26.81	43.31	78.81	97.75	106.38	21.63	38.75	76.81	106.06	111.5
175	32.25	52.94	87.94	106.19	111.63	23.5	44.19	81.31	111.94	116.75
176	28.56	44.38	77.25	92.69	99.25	22.13	37.13	69.13	92.13	97.5
177	36.13	53.25	86.5	102.5	110.81	25.31	41.63	75.75	96.25	98.69

## Sheet: BC  trait
	E1	E1	E1	E1	E1	E2	E2	E2	E2	E2
Num	t1	t2	t3	t4	t5	t1	t2	t3	t4	t5
1	32.875	51.125	85.9375	102.875	108.938	25.1667	38.5	68.6875	91.6875	95.6458
2	30.7321	45.4196	85.5625	99.375	110.625	21.4286	36.0982	66.625	94.2679	101.866
3	29.5625	48.0625	82.3125	99.5625	107.875	22.9375	35.8125	66.8125	87.9375	90.5625
4	36.3125	57.875	94.5625	110.438	119.812	25.4375	41.625	77.4375	105.25	111.438
5	32.25	50.5	86.5	100.562	110.438	27.5625	45.0625	85.625	114.938	123.188
6	31.5	50.0625	89.25	104.125	113.625	23.6875	38.875	72.6875	100.375	103.312
7	29.3125	47.0625	85	96.8125	104.188	25.4375	44.1875	82.5625	108.188	114.188
8	31.25	53.3125	92	111.125	118.312	29.125	52	94.1875	127.375	135.375
9	37.75	59.9375	99.3125	112.125	116.625	28.625	48.9375	87.8125	114.375	120.375
10	33.75	55.125	94.625	107.562	111.938	29	46.5	87.3125	121.75	128.375
11	36.0625	57.125	92.625	104.75	110.188	29.375	50.5	88.0625	113.812	120.188
12	33.125	52.6875	90.4375	102.75	107.875	30.5	51	89.75	114.562	118.5
13	29.6875	48.1875	87.3125	102.438	108.875	25.6875	42.75	81	113.562	121.312
14	37.375	53.8125	96.5	109.188	115.375	31.8125	49.375	90.375	122.875	130.812
15	35.25	56.0625	90.6875	104.688	110.688	28.1875	44	81.6875	114.375	121.688
16	36	54.6875	92.4375	105.938	111.562	28.4375	48.375	87.4375	117.75	122.5
17	29.625	46.625	80.4375	94.3125	103.75	24.4732	40.125	77.5	106.812	109.312
18	32.0625	47.875	84.4375	98.125	104.375	25.5625	41.625	78.4375	108.5	113.062
19	32.6875	49.625	84	102.125	109.688	26.125	40.875	75.125	107.5	113.312
20	28	48.375	86.0625	101.625	107	26.6875	45.4375	83.625	113.062	120.375
21	26.3125	45.125	81.8125	101.125	108.375	27.625	46.125	84.875	119.938	125.562
22	29.125	46.75	85.6875	102.188	108.375	23	39.1875	72.6875	106.25	107.75
23	31.125	51.0625	87	102.562	109	23	40.75	77.625	106.188	111.188
24	28.5625	45.5	82.25	97.1875	105	23.5625	40.9375	76.0625	107.375	112.25
25	29.625	47.4375	84.375	100.812	107.625	28.3125	46.1875	81.875	112.938	116.938
26	34.1875	54.4375	91.25	105.5	112.5	26	42.1875	76.1429	102.312	107.75
27	29.0625	48.875	87.0625	102.125	107	27.625	43.125	75.125	102.75	106.812
28	23.8125	40.875	79.4375	97.0625	103.062	25.625	38.9375	68.8125	102.812	106.5
29	33.75	54.3125	92.5625	106	112.375	29	47.5625	85.125	114	120.062
30	31.8125	49.6875	86.9375	99.75	103.688	28.5625	46.4375	82.8125	111.875	117.875
31	28.6875	46.4375	82	98	104.438
32	28.375	46	80.6875	100.188	106.125	26.125	41.8125	77.875	103.562	109.688
33	34.375	54.5	90.875	107.062	113.188	30.8125	47.8125	84.3125	115.375	121.062
34	31.4375	50.4375	88.0625	106.625	111.625	25.8125	41.6875	77.375	106.375	112.438
35	31.4375	50.3125	85.6875	100.875	107.062	28.875	47.3125	85.5625	116	121.875
36	29.375	45.375	78.9375	96.1875	103.062	24.875	40.3125	77.1875	109.5	113.312
37	30.75	48.25	82.5625	95.3125	101.688	24.3125	38.75	71.1875	98.75	99
38	32.6875	52.5	90.5625	103	107.438	29.0625	42.625	75.125	103.125	104.125
39	24.875	38.6875	74.8125	92.1875	97	26.375	40.1875	72.375	100.875	102.562
40	33.9375	54.6875	91.625	104.312	109.188	26.0625	43.25	78.4375	105.812	108
41	31.0625	46.8482	83.9821	96.5625	102.438	29	48.375	84.6875	110.562	116.312
42	33.1875	52.75	90.25	106.438	113.75	27.375	46.8125	84.9375	116.75	120.125
43	30.375	49.0625	87.125	104.125	110.062	27.6875	46.625	84.75	110.625	113.938
44	28.1875	41.3125	76.625	93.875	103.438	23.8125	39.5	82.375	108.455	113.062
45	35	55.9375	93.3125	106.812	114.562	30.6875	50.125	86.6875	121.312	126.812
46	31.1875	51.8125	89.5	105.812	111.312	30.5	48.4375	83.8125	117.312	122.5
47	29.25	49.5625	85	103.312	109	30.25	47.0625	84.0625	116.25	120.875
48	27	46.5625	82.9375	97.375	102.938	26.9375	45.5625	80.8125	108.938	109.75
49	29	46.5	81.9375	97.1875	102.75	26.5	42.375	78.9375	113.75	118.25
50	27.125	45.4375	80.3125	94.4375	100.062	28.4375	47.4375	86.625	118.375	121.938
51	27.6875	45.3125	82.0625	97.8125	103.5	26.0625	43.625	81.375	106.688	110.188
52	27.9375	46.625	83.3125	103.5	107.75	22.8125	38.625	75.3125	109.438	115
53	27.125	44	81.5625	100.688	104.938	30.875	50.9375	91.3125	125.25	130.562
54	27.3125	44	81.125	97.5	102.75	25.125	45.125	85.8125	112	118.625
55	29.6875	46.4375	79.9375	97.5625	103.062	24.4375	42.6875	83.1875	113.5	118.75
56	32.5625	51.6875	86.75	101.75	108.688	26.375	45.125	84.75	115.188	119.875
57	33.0625	49.4375	81.75	95.375	100.312	23.5	41.4375	80.5	108	114.875
58	30.1875	48.3125	82.4375	97.8125	102.562	29.4375	50.9375	88.3125	117.375	120.062
59	31.625	52.75	88.8125	102.812	107	27.25	47.25	86.625	116.562	120.312
60	25.8125	43.4375	80.0625	96.0625	104	26.25	43.875	81.8125	114.188	120.5
61	30.6875	46.9375	80.125	95	100.188	23.5625	40.4375	77.4375	105.188	112
62	28.5	43.25	77.625	92	99.5	22.375	37.6875	71	95	98.4375
63	24.125	40	75.875	92.125	99.375	20.1071	34.875	67.3214	95.2411	97.5893
64	27.6875	44.5	77.875	94.3125	101.75	23.125	37.3125	66.3125	90.875	94.9375
65	29.375	47.4375	82.5625	94.375	101.25	25.6875	44.625	81.4375	109.5	114.312
66	30.125	52.375	89.75	100.875	106.312	26.4375	47.5625	89.5	119.938	124.5
67	27.4375	45.6875	79.875	92.875	98.75	24.25	42	78.125	100.25	105.75
68	26.625	42.5625	82	91.6875	97.4375	24.1875	42.9375	85.3125	118.312	122.875
69	27.8125	44.6875	81.4375	96.1875	100.938	23.4583	43.3125	84.6607	116.429	122.152
70	28.8125	46.8125	84.0625	98.6875	103.25	22.8125	40.75	80.3125	107.5	110.375
71	30.9375	50.4375	82.0625	98.8125	104	25.25	44.9375	82.8125	111.5	119.5
72	32.1875	53	89.8438	105.062	110	28.1875	47.5	87.8125	119.375	124.125
73	29.375	45.375	80.75	97.1875	100.875	22	39.125	75.9375	106.375	110.875
74	29	45.75	79.5	96.5	103.062	25.4375	43.5	83.3125	114	120
75	26.5625	42.5	74.875	92.6875	100.688	24.5	41.4375	79.75	110.938	116.875
76
77	34.5625	51.25	85.375	97.5	103.375	29.6875	49.4375	90.5	118.438	124.312
78	34.5	52.75	88.75	101.438	104.188	25.25	43	80.25	105.688	108.875
79	29.5	46.3125	81.625	98.375	102.625	28.9375	45.6875	83.8125	107.5	112.125
80	29.625	45.5625	81.8125	98.5	103.688	27.75	45.9375	85.125	116.938	122.75
81	33.4375	50.375	88.5625	102.125	108.062	31.25	48.3125	85.25	112.312	117.25
82	30.1071	47.8661	81.8571	95.1339	100.777	23.8333	45.8542	84.4375	112.833	119.417
83	27.125	43.0625	79.4375	94.5	102.438	27.8125	46.1875	82.375	113.312	118.812
84	28.125	41.9375	73.1875	92	98.5	24.5	41.625	77.4375	107	111.938
85	28.375	43.8125	77.8125	97.25	103.688	30.6875	48.625	84.3125	113.688	119.562
86	29.25	47.0625	82.9375	100	105.75	29.375	47.6875	83.125	112.375	118.188
87	28.125	44.375	82.1875	93.6875	98.75	28.8125	45.25	78.5	106.375	108.312
88	24.1786	40.0179	80.75	91.8125	98.125	26.625	39.5625	71.1875	99.75	101.723
89	30.3125	49.0625	83	97.5	103.875	28.75	43.375	77.9375	93.2054	111.188
90	29.125	45.5625	81.5625	94.1875	100.812	26.9375	46.4375	85.8125	120.5	122.562
91	32.25	50.8125	86.375	100.125	104.938	29.9375	45.4375	82.5	109.5	114.438
92	36.5	55.0625	89.1875	100.625	106.5	28.375	46.375	83.75	113.562	118.938
93	34.3125	53.0625	88.9062	101.375	106.625	27.1875	47.5	86.8125	114.75	120.25
94	34.375	53.4375	89.375	101.938	107.5	28.375	45	81.875	110.688	114.562
95	26.5625	42.625	77.875	90.6875	96.5625	25.8125	38	68	98.3125	99.8125
96	27.3125	43.375	79.6875	93.1875	99.4375	25.9375	38.1875	71.0625	97.25	100.562
97	27.75	45.25	80.5	93.3125	99.875	28.1875	44.9375	81.8125	108.5	110.688
98	25.8125	41.125	77.1875	92.875	100.062	25.6875	42.9375	80.5	108.688	112.562
99	32.6875	49.9375	85.375	99.3125	107.125	26.5	44.375	83.875	108.402	111.312
100	28.5	45.1875	80.5	92.6875	98.125	31.75	48.8125	87.125	114.625	119.375
101	28.3125	43.75	79.25	95.3125	103.688	26.5	44.5	85.375	110.938	113.625
102	30.8125	47.5	85.375	104.062	110.562	27.3125	43.75	80.9375	106.482	108.911
103	23.3125	38.6875	73.8125	94.25	101.25	26.6875	45.5	86.9375	119.062	122.938
104	26.0625	42.125	84.6875	98.1875	103.5	25.75	42.1875	83.125	111.312	117.054
105	33.3125	51.6875	87.4375	98.6875	102.75	27.25	45.875	85.0625	111.188	115.625
106	33.125	51.25	88.25	103.688	113.125	27.875	45.125	83.25	110.75	118.625
107	24.8125	40.625	74.4375	90.4375	96	23.3125	41.1875	77.5625	104.562	106.938
108	27.6875	44.6875	83.25	97.125	103.875	27.9375	45.875	85	113.5	117.062
109	25.625	41.4375	77.5625	94.0625	99.25	25.8125	43.0625	82.5625	110.562	115.938
110	32.625	50.75	85.125	100.125	105.438	30.4375	49.75	91.625	119.312	124.312
111	32.125	51.1875	84.25	95.125	101.125	30.25	51.375	90.5	118.25	122.688
112	28.125	45.6875	81.5625	96.4375	101.188	29.375	50	92	119.875	124.438
113	29.1875	45.625	79.3125	93.125	99.375	26.0625	43.625	82.875	110.491	112.062
114	29.6875	46.875	80.0625	94.125	100.125	27.25	47.5	85.1875	108.688	111.375
115	24.5625	42.125	79.1875	98.0625	103	26.8125	47.625	88.8125	118	123.5
116	30.4375	51	88.75	101.688	108.875	28.75	49.875	91.125	109.812	112.125
117	27.75	44.5625	80.75	95.1875	101.812	27.5	46.875	84.5	113.75	118.812
118	31	47	82.0625	96.6875	104	29	49.875	89.9375	114.812	118.062
119	29.0625	45.25	80.875	98	106.5	22.375	35.5625	70.9375	96.5	98.375
120	26.5	41.4375	76.4375	92.875	101	25.1875	40.3125	73.9375	99.4375	102.375
121	28.875	46	84.125	99.25	107.188
122	31.375	48.375	86.375	100.125	105.562	23.375	37.8125	71	96	98.6875
123	30.0625	48.6875	82.9375	97.875	103	24.1518	41.3839	75.1071	99.4911	104.357
124	29.4375	47.9375	84.0625	95.0625	100.938	23.375	38.5	72.0625	96.625	106.062
125	30.9375	51.3125	88.5625	99.625	104.438	23	37	69.875	97	101.938
126	30.8125	49.875	85.125	96.25	103.062	25.1875	42.25	79.8125	108.75	112.938
127	27.0625	45.125	81.75	101.562	109.188	22.125	40.4375	77.8125	107.062	112.312
128	30.5625	46.3125	80.3125	95.0625	101.312	23	40.8125	78.0625	107.125	111.188
129	30.0625	47.4375	85.9375	100.688	105.188	24	41.1875	79.1875	106.875	111.938
130	32.9375	52.0625	88.5625	100.5	105.75	26.0625	42.75	81.375	103.027	105.312
131	33.9375	52.4375	85.625	100.062	105.875	30.875	49.0625	85.625	109.688	115.25
132	30.9375	48.75	84.5625	97.75	102.5	25.375	44.875	85.8125	114.625	120.562
133	32	52.375	90.625	103.5	110.375	25.8125	46.3125	85.9375	105.938	112.125
134	35	56.875	94.0625	106.312	111.875	30.625	51.1875	94	119.938	125.562
135	27.25	45	81.9375	95.875	100.25	25	41.6875	82.625	108.562	113.812
136	33.375	54.5625	91.1875	103.625	109.625	28.1875	48.375	90.125	117.562	123
137	30	48.4375	82.6875	95.375	103	27.25	47.9375	89.9375	118.562	122.625
138	30.5	50.5	88.3125	104.375	111.5	28.25	43.5	82.625	109.625	114.062
139	28	45.5625	81.0625	96.875	104.375	24.0625	41.5	82.9375	112	116.312
140	33.1875	51	88.875	106	112.875	26.375	43.9375	83.25	113.125	118.562
141	28.5	46.1875	83.8125	98.5625	103.875	23.8125	42.9375	82.75	110.188	116.634
142	31.5625	54	92.5	105.312	109	29.125	50.5625	88.375	115.312	120.75
143	27.375	47.625	86.0625	98.5625	103.625	26.625	47	86.625	117.875	121.938
144	28	46.625	81.0625	96.8125	103.062	25.875	44.625	76.6875	96.9554	101.075
145	28	45.875	84.875	98.6875	105.125	25.3125	41.75	77.375	103.25	107.812
146	35.1875	56.875	94.9062	103.812	110.75	25	41.0625	74.875	101.125	105.375
147	26.375	45.5625	83.875	99	104.5	24.8125	40.8125	76.75	100.875	103.75
148	31.0625	50.75	90.1875	103.562	109.25	25.25	44.3125	83.875	113.223	117.688
149	35.8125	55.375	90.3125	101.375	108.125	27.75	46.4375	84.0625	111.062	116.062
150	34.9375	56.375	95.25	108.375	113.875	31.625	47.1875	85.3125	112.688	117.875
151	32.6875	53.3125	89.75	102.5	106.062	25.8125	46.3125	83.9375	108.188	114.152
152	32.9375	48.8125	84.5625	100	106.375	27.0625	43.8125	81.3125	107.75	110.562
153	33.4375	54.3125	91	104.938	111.438	28.4375	43.1875	82.375	109.75	116
154	31.5	53.25	88.1875	101.438	105.312	27.75	45.4375	78	101.5	106.812
155	36.875	57.5	97.25	107.562	113.75	29.9375	44.6875	77.75	103.938	109.938
156	34.75	54.875	90.875	104.188	109.625	24.5625	41.125	75.1875	96.9375	99.8125
157	31.6875	49.25	85.625	100.312	107.938	28.25	41.75	73.375	98.75	102.438
158	35.5	55.25	91.375	103.562	108.375	30.4375	48.1875	82.375	111.25	115.679
159	29.5625	47.1875	84.75	101.25	109.375	25.375	43.6875	82.375	112.125	117.5
160	34.6875	57.0625	95.8125	105.875	110.312	28.625	49.3125	86.75	106.875	111.312
161	25.8125	42.25	82.125	98	106.438	25.625	41.125	76.125	106.75	113.438
162	27.125	44.625	82.5	98.5	104.375	25.5625	42.8125	79.5625	108.312	115.562
163	32.9375	51.9375	90.625	98.4375	103.875	30.6875	50.3125	88.875	115.393	116.125
164	31.625	51.9375	89.4375	103.312	111	31.6875	47.6875	87.625	115.562	125.062
165	33.0625	54.3125	93	104.875	108.938	28.6875	46.1875	84.125	112.875	117.938
166	33.875	55.0625	90.625	103.5	109.938	29.3125	43.9375	83.125	112.062	118.125
167	29.125	46.9375	84.25	96.625	101.125	29.3125	47.5	86.75	112.625	117.625
168	29	46.875	85.875	98.25	103.188	26.0625	42	81.625	106.688	112.938
169	30.8125	49.9375	86.625	103.812	110.125	27.5	44.8125	86.3125	118.188	125.625
170	36.75	58	95.1875	106.812	113.312	28.875	49.1875	87.875	112.5	116.438
171	30.8125	48.5	85.5625	102	108.955	29	49.1875	90.875	120.875	127.75
172	32.5625	51.25	87.8125	101.375	105.875	27.5625	47	87.8125	118.062	122.75
173	31.625	51.4375	89.9375	105.312	113.188	26.3125	46.5625	86.125	112.625	120.75
174	32	52	91.75	105.312	110.25	25.3125	45.6875	88.5625	114.562	122.75
175	32.4375	51.375	87.3125	104.375	111.938	25.6875	46	90.125	122.438	129.312
176	30.625	46	80.8125	94.9375	101.625	24.9643	45	85.0625	111.5	117.5
177	33.9375	53.5625	90.25	104.25	111.188	27.5	45.375	83.75	107.438	112.938
