# Supplementary material for: Main Effect QTL with Dominance Determines Heterosis for Dynamic Plant Height in Upland Cotton
Source: G3 (Bethesda). 2016 Aug 26;6(10):3373–9. doi: 10.1534/g3.116.034355 (PMC5068956; doi:10.1534/g3.116.034355)
Supplement: Supplemental Material [file supp_g3.116.034355_TableS9.xls]

## Sheet: XZV genotype
RILV population	data type RI self
	180 382 0	1	2	3	4	5	6	7	8	9	10	11	12	13	14	15	16	17	18	19	20	21	22	23	24	25	26	27	28	29	30	31	32	33	34	35	36	37	38	39	40	41	42	43	44	45	46	47	48
1	*SWU10912	A	B	B	A	B	B	A	A	B	A	B	B	B	B	A	B	A	-	A	A	B	A	A	B	B	B	A	B	A	B	A	B	A	A	A	A	B	B	A	A	A	B	B	B	B	B	B	A
2	*Gh398	-	A	A	B	-	-	A	-	B	A	B	-	-	B	A	-	A	-	A	B	A	-	A	-	-	-	A	A	A	B	A	B	A	A	B	A	B	B	A	A	A	B	B	B	B	B	B	A
3	*ICR03295	B	-	B	A	B	-	A	A	B	A	B	-	B	-	A	A	A	A	A	A	B	-	A	B	B	B	-	A	B	-	A	B	A	A	A	A	B	-	A	A	A	B	B	B	B	B	B	-
4	*CGR6129	A	A	B	A	B	-	A	A	B	A	B	A	B	B	A	A	A	A	A	A	A	A	A	B	B	B	A	A	A	B	A	B	A	A	A	A	B	A	A	A	A	B	B	B	B	B	B	A
5	*DPL0790	B	B	A	B	B	-	A	A	-	-	B	-	-	B	A	-	A	-	A	A	B	A	A	-	B	-	-	A	A	A	A	A	-	A	A	-	A	B	B	-	A	B	B	B	B	-	-	-
6	*NAU4045	A	A	A	A	A	A	A	A	A	A	A	A	A	A	A	A	A	A	A	A	A	A	A	A	A	A	A	A	A	A	A	A	A	A	A	A	A	A	A	A	A	A	A	A	A	A	A	A
7	*NAU3177	A	A	A	A	A	A	A	A	A	A	A	A	A	A	A	A	A	B	B	A	A	A	A	A	A	A	A	A	A	A	A	A	A	A	A	A	A	A	A	A	A	A	A	A	A	A	A	A
8	*ICR03724	-	-	B	B	-	-	-	-	-	-	-	-	-	B	-	-	-	-	B	A	B	B	B	-	-	-	-	A	B	A	A	A	-	B	B	B	B	B	A	-	-	-	B	-	-	B	-	-
9	*ICR03725	B	B	A	B	B	-	A	A	B	A	B	-	-	A	A	-	-	A	A	A	B	A	A	-	-	-	A	A	A	A	A	A	-	B	A	B	A	B	B	-	-	B	B	B	B	B	-	-
10	*MUSS422	A	A	A	A	A	A	A	A	A	A	A	A	A	A	A	A	A	A	A	A	A	A	A	A	A	A	A	A	A	A	A	A	A	A	A	A	A	A	A	A	A	A	A	A	A	A	A	A
11	*CGR6695	A	B	A	A	A	A	A	B	A	B	A	B	A	B	B	B	B	A	B	B	A	B	B	A	B	B	B	B	A	A	A	B	B	A	A	B	B	B	A	A	B	B	A	B	A	A	B	B
12	*SWU12490	B	A	B	-	B	B	B	A	B	-	B	B	B	B	A	A	B	-	B	B	A	-	B	-	-	B	B	A	A	A	A	B	-	A	A	B	B	-	A	A	-	-	-	B	A	B	A	A
13	*SWU11013	A	B	A	A	A	A	A	B	A	B	A	-	A	B	B	B	B	A	B	B	A	B	B	A	B	B	B	A	A	A	A	B	B	A	A	B	B	B	A	A	B	B	A	B	A	A	B	A
14	*DPL0217	A	A	B	A	-	-	A	-	A	B	A	B	A	B	B	B	B	A	B	B	A	B	B	A	B	B	-	A	A	A	A	B	B	A	A	B	B	B	A	A	-	A	A	B	A	A	B	A
15	*SWU11889	B	B	A	B	B	B	A	B	A	A	B	-	A	A	A	B	A	A	A	B	B	B	A	A	B	A	B	B	A	B	B	B	-	B	-	B	B	-	B	A	B	B	A	-	-	-	B	B
16	*SWU11887	A	A	B	A	A	A	B	A	B	-	A	B	B	B	B	A	B	B	B	A	A	A	B	B	A	B	A	B	B	A	A	A	A	A	A	A	A	B	A	B	A	A	B	B	B	-	A	A
17	*SWU11976	B	B	B	A	B	B	A	B	A	A	A	B	A	B	B	B	B	A	B	B	B	B	A	A	B	A	B	-	A	A	B	A	B	B	B	A	B	B	B	A	B	B	A	A	A	A	B	B
18	*TMB1268	B	B	A	B	B	B	A	B	-	A	A	-	A	B	B	B	B	A	B	B	B	B	A	A	B	A	B	A	A	A	B	A	B	B	B	A	B	A	B	A	B	B	A	A	A	A	B	-
19	*JESPR304	B	B	A	B	B	B	A	B	A	A	A	B	A	A	B	B	A	A	A	B	B	B	A	A	B	A	B	B	A	B	B	A	B	B	B	A	B	A	B	A	B	B	A	A	A	A	B	B
20	*SWU12840	B	-	A	A	A	B	A	A	B	B	B	B	A	B	B	A	B	A	B	B	A	B	B	A	A	B	B	A	A	A	A	-	-	A	B	A	B	B	B	A	B	B	B	B	A	B	A	A
21	*NAU2742	B	B	A	A	A	B	A	A	B	B	B	B	A	B	B	A	B	A	B	B	A	B	B	A	A	B	B	A	A	A	A	A	A	A	B	A	B	B	B	A	B	B	B	B	A	B	A	A
22	*SWU12841	B	B	A	A	A	B	A	A	B	B	B	B	A	B	B	A	B	A	B	B	A	B	B	A	A	B	B	A	A	A	A	A	A	A	B	A	B	B	B	A	B	B	B	B	A	B	A	A
23	*SWU12838b	B	B	A	A	A	B	A	A	B	B	B	-	A	B	B	A	B	B	B	B	A	B	B	A	A	-	B	A	A	A	A	A	A	A	B	A	B	-	B	A	B	B	B	B	A	B	A	A
24	*SWU18881	B	A	A	B	A	-	B	A	A	B	B	-	B	-	B	-	A	A	A	A	B	A	A	A	B	B	-	B	-	-	-	A	B	B	-	B	A	B	B	B	A	A	B	B	B	A	B	A
25	*NAU2701	A	B	B	A	B	A	A	B	B	A	A	B	A	B	A	B	B	A	B	B	A	B	B	B	A	A	B	A	A	B	A	A	B	A	B	A	A	A	B	B	A	A	B	A	B	B	A	B
26	*SWU18876	A	B	B	A	B	A	A	B	B	A	A	B	A	B	A	B	B	A	B	B	A	-	B	B	A	A	-	A	B	B	A	A	B	A	B	A	A	A	B	B	A	A	B	A	B	B	A	B
27	*BNL1167	A	A	B	-	-	-	B	-	B	-	-	B	B	-	-	-	B	B	A	B	A	-	B	-	B	A	B	B	A	A	A	B	A	A	A	A	A	-	-	B	B	A	A	B	B	A	B	A
28	*BNL530	B	A	A	B	A	A	A	B	B	B	B	B	A	A	A	B	B	B	B	A	A	B	A	A	B	A	B	A	A	B	A	A	A	B	A	A	A	A	A	B	A	B	B	A	A	A	B	-
29	*SWU16781	B	A	A	A	A	B	B	B	B	B	B	B	A	A	B	B	A	A	A	B	B	B	A	A	B	A	B	A	B	B	A	A	A	-	B	A	A	A	A	A	A	B	B	B	B	B	B	B
30	*JESPR295	B	A	A	A	A	B	B	B	-	B	B	B	A	A	B	B	A	A	A	B	B	B	A	A	B	A	B	A	B	B	A	A	A	B	B	A	A	A	A	A	-	B	B	A	B	B	B	-
31	*SWU16782	B	-	-	-	-	-	-	-	B	-	-	-	-	A	-	-	A	A	-	B	B	-	-	A	B	A	B	A	B	B	A	A	A	B	B	A	A	A	A	A	A	-	B	A	B	-	B	B
32	*SWU16783	B	A	A	A	A	B	B	B	B	B	B	B	A	A	B	B	A	A	A	B	B	B	A	A	B	A	B	A	B	B	A	A	A	B	B	A	A	A	A	A	A	B	B	A	B	B	B	B
33	*Gh260	B	B	B	B	B	A	-	-	-	B	-	A	-	-	B	A	-	A	A	A	B	A	B	-	A	-	A	A	A	B	A	B	B	A	B	A	A	A	B	-	-	B	B	A	B	B	-	-
34	*PGML0120	A	A	A	A	B	B	B	-	A	B	B	B	A	A	B	B	B	B	B	B	A	B	A	B	A	A	B	B	B	A	B	A	A	B	A	B	B	A	A	B	A	A	A	B	A	A	B	B
35	*SWU20917	A	A	A	A	B	B	B	B	A	-	B	B	A	A	B	B	B	A	B	B	A	B	A	B	A	A	B	B	B	A	B	A	A	B	A	-	B	-	A	B	A	A	A	B	A	A	B	B
36	*BNL3650	B	B	A	-	-	-	-	-	A	-	A	A	-	A	B	-	B	-	B	A	B	B	A	-	-	-	B	A	B	B	A	A	-	A	A	A	A	A	B	B	B	B	B	A	A	A	B	A
37	*SWU19656	A	A	B	B	B	B	A	A	B	A	B	B	B	B	A	B	-	B	A	-	B	A	B	A	A	A	A	B	B	A	B	B	-	-	B	B	-	B	A	A	A	A	A	-	B	-	A	B
38	*MGHES18	A	A	B	B	B	B	A	A	B	A	B	B	B	B	A	B	A	B	A	B	B	A	B	A	A	A	A	B	B	A	B	B	A	B	B	B	B	B	A	A	A	A	A	B	B	A	A	B
39	*SWU19654	A	A	B	B	B	B	A	A	B	A	B	B	B	B	A	B	A	B	A	B	B	A	B	A	A	A	A	B	B	A	B	B	A	-	B	B	B	B	A	A	A	A	A	B	B	A	A	B
40	*CGR5355	A	A	B	B	B	B	A	A	B	A	B	B	B	B	A	B	A	B	A	B	B	A	B	A	A	A	A	B	B	A	B	B	A	B	B	B	B	B	A	A	A	A	A	B	B	A	A	B
41	*HAU0483	A	A	B	B	B	B	A	A	B	A	B	B	B	B	A	B	A	B	A	B	B	A	B	A	A	A	A	A	B	A	B	B	A	B	B	B	B	B	A	A	A	A	A	B	B	A	A	B
42	*SWU19606	B	A	B	B	B	B	A	A	B	A	B	B	B	B	A	-	A	B	B	B	B	A	B	A	A	-	A	B	B	A	B	B	B	B	B	B	B	B	A	A	A	A	A	B	B	B	A	B
43	*DC40417	B	A	B	B	B	B	-	A	B	A	B	B	B	B	A	B	A	-	B	B	B	A	B	B	A	A	-	B	B	A	B	B	A	B	B	B	B	B	A	-	A	A	A	B	B	B	-	-
44	*CGR5883	B	A	B	B	-	-	-	-	B	A	B	B	-	B	A	-	A	-	B	B	B	-	B	-	A	-	A	B	B	A	B	B	-	B	B	B	B	B	A	A	A	A	A	B	B	A	B	B
45	*DPL0244	B	A	B	B	B	B	A	A	B	A	B	B	B	B	A	B	A	B	B	B	B	A	B	A	A	A	A	B	B	A	B	B	A	B	B	B	B	B	A	A	A	A	A	B	B	A	A	B
46	*HAU2768	-	B	B	B	B	A	-	-	-	B	-	A	-	-	B	A	-	-	A	A	B	A	B	-	A	-	A	A	A	B	A	B	B	A	B	A	A	A	B	-	-	B	B	A	B	B	-	-
47	*TMB2940	B	A	B	B	B	B	A	B	B	A	B	B	B	B	A	B	A	B	B	B	B	A	B	A	A	A	A	B	B	A	B	B	A	B	B	B	A	B	A	A	A	A	A	B	B	A	A	B
48	*HAU0921	B	A	B	B	B	B	A	A	B	A	B	B	B	B	A	B	B	A	B	B	B	A	B	A	A	A	A	B	B	A	B	B	A	B	B	B	B	B	A	A	A	A	A	B	B	A	A	B
49	*CGR5801	B	A	B	B	B	B	A	A	B	A	B	B	B	B	A	B	A	B	B	B	B	A	B	A	A	A	A	B	B	A	B	B	A	-	B	B	B	B	A	A	A	A	A	B	B	A	B	B
50	*SWU19249	B	A	A	A	A	-	A	A	B	B	B	B	A	A	A	A	B	B	B	B	B	A	B	A	A	A	A	A	A	-	B	B	A	-	B	B	B	B	A	A	A	A	B	B	B	A	A	A
51	*DPL0590	B	A	A	A	B	A	A	-	B	B	B	B	A	B	A	A	B	B	B	B	B	A	B	A	B	A	A	A	A	B	B	B	A	A	B	B	B	B	A	B	A	A	B	B	B	A	A	A
52	*PGML2464	B	A	A	A	A	-	-	-	B	B	B	B	A	A	A	A	B	B	B	B	B	A	B	A	B	A	A	A	A	B	B	B	A	-	B	B	B	B	A	B	A	A	B	B	B	A	A	A
53	*CGR5124	B	B	A	A	A	A	B	A	A	B	B	B	B	A	B	A	A	B	B	B	B	B	A	B	A	B	A	A	A	B	B	B	A	A	B	B	B	B	A	A	A	A	B	B	B	A	A	A
54	*HAU1371	A	A	B	A	A	A	B	B	B	A	A	B	A	A	A	B	B	B	B	B	B	B	B	A	B	B	B	A	B	B	A	B	B	B	A	B	A	B	A	A	A	A	A	B	B	B	A	A
55	*CGR6749	B	A	A	A	-	-	A	A	A	B	B	B	A	B	A	A	B	B	B	B	B	A	B	-	B	A	A	A	A	B	B	B	B	B	B	B	A	B	-	A	A	A	B	A	B	A	A	A
56	*SWU19184	-	-	A	A	A	B	A	-	A	-	B	B	A	B	A	A	A	B	B	B	B	A	B	A	B	A	A	A	A	B	B	B	A	A	B	B	A	A	A	B	-	A	B	B	B	-	A	A
57	*NAU3181	-	-	-	-	-	-	-	-	-	-	-	-	-	-	-	-	-	-	-	-	-	-	-	-	-	-	-	-	-	-	-	-	-	-	-	-	-	-	-	-	-	-	-	-	-	-	-	-
58	*MGHES58	A	B	B	A	A	A	B	B	A	A	B	A	A	B	A	B	B	A	A	B	A	B	B	B	B	B	B	A	A	A	B	B	A	B	B	A	B	A	B	A	A	A	A	A	B	A	B	B
59	*CGR6586	B	B	B	A	B	-	A	A	B	-	B	B	A	B	B	B	B	A	B	A	B	B	B	B	A	B	B	B	B	A	B	A	A	A	B	B	B	B	A	B	A	A	A	B	A	B	A	A
60	*NAU845	B	B	B	A	B	A	A	A	B	A	B	B	A	B	B	B	B	A	B	A	B	B	B	B	A	B	B	B	B	A	B	A	A	A	B	B	B	B	A	B	A	A	A	B	A	B	A	A
61	*CGR5372	B	B	B	A	A	A	A	A	B	A	B	B	A	B	B	B	B	A	B	A	B	B	B	B	A	B	B	B	B	A	B	A	A	A	B	B	B	B	A	B	A	A	A	B	A	B	B	A
62	*SWU10205	A	A	A	B	B	B	B	B	A	B	A	-	A	B	A	A	A	-	B	A	B	A	A	A	A	A	A	A	A	B	B	A	B	-	-	A	A	A	-	B	A	B	B	B	A	B	B	B
63	*NAU4064	-	B	A	B	A	A	B	B	A	B	A	-	A	A	B	B	A	A	A	A	A	A	B	B	B	B	B	B	B	B	-	A	B	A	-	B	B	A	B	B	B	B	B	B	B	B	B	B
64	*Gh197	A	B	A	B	B	B	B	A	A	B	A	B	A	B	B	A	B	B	B	A	A	B	B	A	A	B	B	B	A	A	A	B	A	A	B	A	B	B	B	B	A	B	A	B	A	A	B	A
65	*DC20094	A	B	A	B	B	A	A	B	A	B	A	B	A	B	B	A	B	B	B	A	B	B	A	A	A	B	B	B	A	A	A	B	A	A	B	A	B	B	B	B	-	B	A	B	A	A	-	-
66	*Gh499	B	A	B	A	B	B	A	B	-	A	B	A	A	B	B	A	A	B	A	B	B	B	B	B	B	A	B	B	A	B	B	A	B	B	A	B	A	B	A	A	B	A	A	B	A	B	B	A
67	*Gh111	B	A	B	A	B	B	A	B	B	A	B	A	A	B	B	A	A	B	A	B	B	B	B	B	B	A	B	B	A	B	B	B	B	B	A	B	A	B	A	A	B	A	A	B	A	B	B	A
68	*Gh27	B	A	B	A	B	B	A	B	B	A	B	A	A	B	B	A	A	A	A	B	B	B	B	B	B	A	B	B	A	B	B	B	B	B	A	B	A	B	A	A	B	A	A	B	A	B	B	A
69	*CGR6771	A	A	B	B	B	B	A	A	B	A	B	A	B	B	A	B	B	A	B	A	B	B	A	B	A	A	B	A	B	A	A	A	A	B	A	B	B	B	A	A	B	A	B	B	B	A	B	B
70	*CGR5009	A	B	B	B	B	B	A	A	B	A	B	A	B	B	A	B	B	A	B	A	B	B	A	B	A	A	B	A	B	A	B	A	A	B	A	B	B	B	B	A	B	A	B	B	B	B	B	B
71	*SWU15517	A	A	B	B	B	B	A	A	B	A	B	-	B	B	A	B	B	A	B	A	B	B	A	B	A	A	B	A	B	A	-	A	-	B	A	B	B	B	A	A	B	A	B	B	B	A	B	B
72	*SWU15511	A	A	B	B	B	B	A	A	B	A	B	A	B	B	A	B	B	A	B	A	B	B	A	B	A	A	B	A	B	A	B	A	A	B	A	B	B	B	A	A	B	A	B	B	-	A	B	B
73	*SWU15413	A	A	B	B	B	B	-	A	-	B	B	B	A	B	-	B	A	A	B	B	A	B	A	A	A	B	B	A	B	A	B	B	A	B	B	B	-	B	A	A	B	A	B	A	B	A	B	A
74	*BNL1317	A	A	B	B	B	B	A	A	-	B	B	B	A	B	A	B	A	A	B	B	A	B	A	A	A	B	B	A	B	A	B	B	A	B	B	B	B	B	A	A	B	A	B	A	B	A	B	-
75	*Gh247	B	B	A	A	A	A	B	B	-	A	A	A	B	A	B	A	B	B	A	A	B	A	B	B	B	A	A	B	A	B	A	A	B	A	A	A	A	A	A	A	A	A	A	B	A	B	A	-
76	*CGR5867	B	B	B	A	B	-	B	-	B	-	B	B	-	A	B	-	-	-	A	A	B	A	B	-	A	A	A	B	A	B	A	A	A	A	A	A	A	A	B	B	-	A	B	A	A	B	A	A
77	*SWU15407	A	A	B	B	B	B	A	A	B	A	B	B	A	B	A	-	A	A	B	B	A	B	A	A	A	B	B	A	B	A	B	B	A	-	B	B	B	B	A	A	B	A	B	A	B	A	B	A
78	*PGML2830	A	A	B	B	B	A	-	-	A	-	A	A	A	B	A	B	A	B	A	A	B	B	A	B	A	A	A	B	B	A	B	A	B	B	A	B	B	B	B	B	A	A	A	B	B	A	B	A
79	*CGR6876	A	A	B	B	B	B	A	A	B	A	B	B	A	B	A	B	A	A	B	B	A	B	A	A	A	B	B	A	B	A	B	B	A	B	B	B	B	B	A	A	B	A	B	A	B	A	B	A
80	*SWU15157	A	B	B	A	B	-	A	A	B	B	A	B	A	A	B	B	A	A	A	A	A	B	B	B	B	B	B	A	A	B	B	B	B	B	A	A	A	B	B	B	A	A	B	A	B	B	B	A
81	*DPL0707	A	A	A	A	A	A	A	A	A	A	A	A	A	A	A	A	A	A	A	A	A	A	A	A	A	A	A	A	A	A	A	A	A	A	A	A	A	A	A	A	A	A	A	A	A	A	A	A
82	*HAU0635	B	B	B	A	B	B	A	A	B	B	A	B	A	A	B	B	A	B	A	A	B	A	B	B	B	B	A	B	A	A	B	A	B	A	A	B	A	A	A	A	A	A	B	B	B	A	A	A
83	*NAU2139	B	-	A	B	A	B	A	-	A	B	B	A	B	B	B	B	B	A	A	B	A	B	-	A	B	B	A	B	B	B	A	A	A	B	A	A	B	B	A	B	B	B	B	B	B	B	B	A
84	*SWU20689	A	A	B	A	B	B	A	B	A	A	A	B	B	A	A	B	B	B	B	A	A	B	A	A	A	A	-	B	A	B	A	A	B	B	A	B	A	A	B	B	A	B	B	B	B	B	B	B
85	*NAU3390	B	B	A	B	B	-	-	A	A	A	A	A	A	A	B	-	B	-	-	-	B	B	B	A	-	A	-	B	B	A	B	-	A	B	B	B	B	B	A	-	A	B	B	-	B	B	A	-
86	*CGR5421	B	A	A	B	A	A	-	-	-	B	-	-	B	B	B	B	-	B	A	A	A	B	A	-	A	-	B	B	B	B	A	B	-	A	B	B	B	-	B	-	A	A	B	B	A	A	-	-
87	*DC40250	A	A	B	B	A	B	B	A	B	A	A	B	A	B	B	A	B	B	B	B	A	B	B	B	B	A	B	B	B	B	A	B	B	A	A	A	A	A	B	B	A	B	B	B	A	B	B	A
88	*COT107	A	B	B	A	A	B	B	B	A	B	A	B	A	B	A	B	B	A	B	A	B	B	B	A	B	B	B	A	B	B	B	B	A	A	B	A	A	A	B	B	B	A	A	A	A	A	B	A
89	*Gh631	A	B	B	A	A	B	B	B	A	B	A	B	B	A	A	B	B	A	B	A	B	B	B	A	A	B	B	A	B	A	B	B	A	A	B	A	A	A	A	B	B	B	A	A	A	A	B	A
90	*CGR5331	A	B	B	A	B	B	B	A	B	A	B	A	A	B	B	B	A	B	B	A	B	A	A	A	B	B	A	A	B	B	B	A	A	A	A	B	B	B	A	A	A	B	B	B	B	A	A	A
91	*CGR5554	B	A	A	B	A	-	-	B	A	B	A	B	B	A	A	A	A	-	A	-	-	-	B	B	A	A	-	-	B	B	A	B	B	B	B	A	A	-	B	-	B	A	A	-	-	-	A	A
92	*SHIN1462	A	B	B	A	B	B	B	A	B	A	B	A	A	B	B	B	A	B	B	A	B	A	A	A	B	B	A	A	B	B	B	A	A	A	A	B	B	A	A	A	A	B	B	B	B	A	A	A
93	*SWU13032	A	B	A	A	-	A	A	B	B	A	B	B	-	B	A	B	B	A	B	-	-	A	B	A	B	B	A	B	-	A	A	A	A	A	A	A	-	B	A	A	B	B	A	B	A	A	A	A
94	*CER0165	-	-	-	-	-	-	-	-	-	-	-	-	-	-	-	-	-	-	-	-	-	-	-	-	-	-	-	-	-	-	-	-	-	-	-	-	-	-	-	-	-	-	-	-	-	-	-	-
95	*NAU2893	A	A	B	A	B	A	A	B	B	A	B	B	A	B	A	A	A	B	A	B	B	B	A	A	A	B	B	B	A	A	B	A	A	B	A	B	B	A	B	A	B	A	A	A	B	B	A	A
96	*TMB0071	A	B	B	A	B	A	A	A	A	B	B	B	B	B	A	A	B	B	B	A	A	A	A	B	A	A	A	A	A	B	A	B	B	A	B	A	B	A	A	A	B	B	B	A	B	A	B	B
97	*BNL3661	B	B	A	A	A	B	A	B	B	A	B	A	A	A	B	B	A	A	A	A	B	B	B	A	B	B	B	B	B	B	B	A	A	A	A	B	A	B	B	B	B	A	A	B	A	B	A	A
98	*PGML2498	B	B	B	B	A	A	A	A	B	A	B	B	B	A	B	A	A	A	A	B	B	A	B	A	B	A	A	A	A	B	A	A	B	A	A	B	B	A	A	A	B	A	B	A	A	B	A	B
99	*CGR6784	B	B	B	B	A	A	A	A	B	A	B	B	B	A	B	A	A	A	A	B	B	A	B	A	B	A	A	A	A	B	A	A	B	A	A	B	A	A	A	A	B	A	B	A	A	B	A	B
100	*CGR6683	A	A	A	-	-	-	-	-	A	A	A	-	-	-	-	-	A	A	A	-	-	-	-	-	A	A	A	A	-	-	A	A	A	A	A	A	A	-	A	A	A	A	A	A	A	A	A	A
101	*NAU3308	A	A	A	A	A	A	B	A	A	A	A	A	A	A	A	A	A	A	A	A	A	A	A	A	A	A	A	A	A	A	A	A	A	A	A	A	A	A	A	A	A	A	A	A	A	A	A	A
102	*Gh120	B	B	B	B	B	A	A	A	A	A	B	A	A	A	B	A	A	A	A	B	B	A	B	A	B	A	A	A	A	B	A	A	B	A	A	B	B	B	A	A	A	A	B	B	B	B	A	A
103	*Gh529	A	A	A	A	A	A	A	A	-	-	B	-	-	A	A	A	B	B	B	A	A	A	B	B	B	B	-	A	A	A	A	A	A	A	B	A	B	A	B	B	A	A	B	B	B	B	-	-
104	*NAU3820	B	B	B	B	B	A	A	B	A	A	A	A	B	B	B	A	A	A	A	B	B	B	A	B	A	B	B	B	B	B	B	B	B	B	A	B	A	A	A	B	B	-	A	A	A	A	A	B
105	*DPL0502	B	B	A	A	B	A	B	-	A	A	A	A	B	A	A	B	B	A	B	A	A	A	B	A	B	B	A	A	B	A	A	A	A	B	B	A	B	B	A	A	A	B	B	A	B	A	A	B
106	*CIR228	B	B	A	A	B	-	B	A	A	A	A	A	B	A	B	B	B	A	B	A	A	A	B	A	B	B	A	A	B	A	A	A	A	B	B	A	B	A	A	A	A	B	B	A	B	A	A	B
107	*CIR307	A	A	B	A	B	-	A	A	B	A	B	A	A	A	A	A	A	B	A	A	B	A	B	A	B	A	A	B	A	A	A	B	B	B	B	B	B	A	A	B	B	A	B	B	A	B	B	B
108	*NAU3736	B	A	A	A	A	-	A	B	B	A	A	B	A	B	B	B	B	A	B	B	A	B	A	B	A	B	B	A	B	B	B	B	A	A	A	A	A	B	A	A	A	B	A	A	A	B	A	A
109	*SWU11691	B	A	-	A	A	B	B	A	B	A	A	A	A	A	B	-	A	A	B	B	B	B	A	B	A	B	B	A	B	B	B	B	A	-	A	A	A	B	A	A	B	B	B	B	A	B	B	A
110	*JESPR297	A	A	A	B	-	B	A	-	A	B	A	A	A	A	A	A	B	A	B	A	B	B	A	B	A	A	B	B	B	A	B	A	B	A	A	A	B	B	A	A	B	B	B	B	A	B	B	B
111	*SWU13514	A	A	A	B	B	B	A	A	A	B	A	A	A	B	A	A	B	A	B	A	B	B	A	B	A	A	B	B	B	A	B	A	B	A	A	A	B	B	A	A	B	B	B	B	A	B	B	B
112	*ICR00647	A	A	A	B	B	B	A	A	A	B	A	A	A	A	A	A	B	-	B	-	B	B	A	B	A	A	-	-	B	A	B	A	-	A	A	A	B	-	-	-	B	B	B	-	A	B	-	-
113	*SWU20341	-	A	A	B	B	B	A	A	A	B	A	A	A	B	A	A	B	A	B	A	B	B	A	B	A	A	B	B	B	A	B	A	B	A	A	A	B	A	A	A	B	B	B	B	A	B	B	B
114	*DPL0897	A	A	A	B	B	B	-	A	B	-	A	-	-	B	A	-	B	A	B	A	B	B	A	-	A	-	B	B	B	A	B	A	B	A	A	A	B	A	A	A	B	B	B	B	A	B	B	B
115	*SWU10266	-	B	A	B	A	A	A	-	A	A	B	A	A	B	A	-	-	B	B	A	B	A	B	B	A	A	A	A	A	A	B	A	A	A	A	B	B	A	B	A	B	-	B	-	A	-	-	B
116	*C2_0011B	A	B	A	B	A	A	A	A	-	A	B	A	A	B	A	A	B	B	B	B	B	A	B	B	A	A	A	A	A	A	B	A	B	A	B	B	B	A	B	B	B	A	B	B	B	B	B	A
117	*HAU1129	B	A	B	B	B	B	B	A	B	A	B	A	A	B	A	A	B	B	B	A	B	A	B	B	A	B	A	A	A	A	A	A	A	B	B	B	B	A	B	B	B	A	B	B	A	B	A	B
118	*SWU12838a	A	A	A	A	B	A	A	B	A	B	B	-	A	A	A	B	B	B	B	B	A	A	A	B	A	-	A	A	B	B	B	B	B	B	B	B	A	B	A	A	B	B	A	A	A	B	A	A
119	*HAU1413	B	B	A	A	A	B	A	A	B	B	B	B	A	B	B	A	B	A	B	B	A	B	B	A	A	B	B	A	A	A	A	A	A	A	B	A	B	A	B	A	B	B	B	B	A	B	A	A
120	*SWU12818	B	B	B	B	A	B	B	A	B	B	A	B	-	B	B	A	A	A	A	A	A	B	B	-	B	-	B	A	A	A	A	A	-	-	A	A	B	B	B	B	B	A	B	B	B	A	B	B
121	*CGR5576	-	-	-	-	-	-	-	-	-	-	-	-	-	-	-	-	-	-	-	-	-	-	-	-	-	-	-	-	-	-	-	-	-	-	-	-	-	-	-	-	-	-	-	-	-	-	-	-
122	*Gh501	A	A	A	A	A	A	A	A	-	A	B	A	A	A	A	A	A	A	A	A	A	A	A	A	A	A	A	A	A	A	A	A	A	A	A	A	A	A	A	A	A	A	A	A	A	A	-	-
123	*ICR02849	A	B	B	A	B	B	A	B	B	A	B	A	A	B	B	A	A	A	A	B	A	A	B	B	B	B	B	B	A	A	A	A	A	A	A	B	A	A	B	B	B	B	B	A	A	A	B	B
124	*Gh616	A	A	A	A	A	A	A	A	A	A	A	A	A	A	A	A	A	A	A	A	A	A	A	A	A	A	A	A	A	A	A	A	A	A	A	A	A	A	A	A	A	A	A	A	A	A	A	A
125	*NAU797	A	A	A	A	A	A	A	A	A	A	A	A	A	A	A	A	A	A	A	A	A	A	A	A	A	A	A	A	A	A	A	A	A	A	A	A	A	A	A	A	A	A	A	A	A	A	A	A
126	*HAU0878	A	A	A	A	A	A	A	A	A	A	A	A	A	A	A	A	A	A	A	A	A	A	A	A	A	A	A	A	A	A	A	A	A	A	A	A	A	A	A	A	A	A	A	A	A	A	A	A
127	*NAU2894	-	-	-	-	-	-	-	-	-	-	-	-	-	-	-	-	-	-	-	-	-	-	-	-	-	-	-	-	-	-	-	-	-	-	-	-	-	-	-	-	-	-	-	-	-	-	-	-
128	*HAU3069	A	A	B	A	B	A	A	B	B	A	B	A	A	B	A	A	A	B	A	B	B	B	A	A	A	B	B	B	A	A	B	A	A	B	A	B	B	A	A	A	B	A	A	A	B	B	A	A
129	*PGML4342	-	A	-	B	A	B	A	B	A	A	B	B	B	B	A	A	B	B	B	B	B	B	A	A	A	A	B	B	A	A	B	A	A	B	A	A	B	A	A	A	B	A	A	A	B	A	A	A
130	*SWU17882	A	A	B	B	A	B	-	B	B	A	B	-	B	B	B	A	B	B	A	B	A	B	A	A	A	B	B	B	A	A	A	B	A	A	B	B	A	A	B	A	B	A	A	B	A	A	A	A
131	*SWU17897	A	A	B	B	A	B	B	B	B	A	B	A	A	-	B	B	B	-	A	B	A	B	A	A	A	B	B	B	A	A	A	B	A	A	A	B	A	A	B	A	B	A	A	A	A	A	A	A
132	*TMB0107	A	B	B	B	A	B	B	B	B	A	B	A	A	B	B	B	B	B	A	A	A	B	A	A	A	B	B	B	A	A	A	B	A	A	A	B	A	A	B	B	B	A	A	B	A	A	A	A
133	*SWU20700	B	B	A	-	B	B	A	A	A	A	B	B	B	A	B	-	B	A	A	B	A	B	A	A	-	B	B	B	B	A	B	B	B	A	A	A	A	B	A	-	A	A	B	A	B	A	A	A
134	*CGR5548	B	B	A	A	B	B	B	A	A	A	B	-	-	A	B	-	-	A	A	B	A	B	A	-	-	-	-	B	B	A	B	B	-	A	A	A	A	B	A	-	-	A	B	A	B	A	A	-
135	*CGR6154	B	A	B	A	-	-	A	-	A	A	B	B	-	B	B	-	A	-	A	B	A	A	A	-	A	-	A	B	B	A	B	B	-	B	A	A	A	B	A	A	A	B	B	B	A	A	B	B
136	*SWU20246	A	A	B	A	A	A	B	A	A	B	A	B	B	B	B	A	B	A	B	B	A	A	B	B	B	A	A	A	A	A	B	A	A	B	A	A	A	B	A	A	A	B	B	B	A	B	A	A
137	*CER0167	B	B	A	A	B	B	A	B	A	A	B	B	B	A	B	A	B	A	A	B	A	B	A	A	A	B	B	B	B	A	B	B	B	A	A	A	A	B	A	A	A	A	B	A	B	A	A	A
138	*SWU20035	A	B	B	B	-	-	A	A	A	-	A	B	A	B	A	A	B	A	B	B	A	A	A	B	B	A	A	A	B	A	B	A	A	A	A	B	B	A	A	A	A	A	B	B	B	B	B	B
139	*HAU1378	B	B	B	A	B	A	A	A	A	B	A	B	B	B	A	B	B	B	B	A	B	A	A	A	B	B	A	B	B	A	A	A	A	A	B	B	A	A	B	A	A	B	B	A	B	B	B	B
140	*BNL1552	A	B	B	B	A	A	-	-	-	-	-	-	-	A	B	-	-	-	A	A	A	B	A	A	-	-	-	A	B	B	B	A	-	A	B	B	A	B	B	B	-	A	B	A	A	A	A	-
141	*Gh451	A	A	B	A	A	A	B	A	A	B	A	B	B	B	B	A	B	A	B	B	A	A	B	B	B	A	A	A	A	A	B	A	A	B	A	A	A	B	A	A	A	B	B	B	A	B	A	A
142	*SWU16489	B	A	A	B	A	A	A	B	B	A	A	-	A	A	B	A	B	A	B	A	B	B	A	A	B	A	B	A	B	B	B	A	A	A	B	A	A	B	B	B	B	B	A	A	A	A	B	A
143	*JESPR154	A	A	B	B	B	-	-	-	B	-	B	-	-	A	B	-	-	-	B	A	B	B	B	-	A	-	B	B	B	B	B	A	-	B	A	B	B	B	A	B	B	B	B	B	A	A	-	-
144	*BNL3171	B	A	A	-	-	-	-	-	A	A	A	B	-	-	A	-	A	-	A	B	-	-	B	-	-	-	A	B	-	-	B	B	-	A	B	A	-	-	A	B	A	A	A	A	B	B	A	A
145	*HAU0423	A	B	B	A	A	A	A	B	-	-	B	-	-	A	B	-	B	A	B	A	A	B	A	B	B	B	B	A	B	B	A	A	A	B	A	B	B	B	B	B	B	B	B	B	A	A	-	-
146	*DPL0777	A	A	B	A	A	A	B	B	B	B	B	A	B	A	B	B	B	A	B	B	A	B	A	B	A	B	B	A	B	B	A	A	A	A	B	B	B	B	B	A	B	B	B	B	A	A	B	-
147	*DPL0131	A	A	B	A	A	A	B	B	B	B	B	B	B	A	B	-	B	A	B	B	A	B	A	A	A	-	B	B	B	B	A	B	-	A	B	B	B	B	B	B	B	B	B	B	A	A	-	-
148	*NAU2026	A	A	A	A	A	A	A	A	A	A	B	A	B	A	A	B	A	A	A	A	A	B	A	A	B	A	B	A	B	A	A	A	A	B	B	A	A	B	A	A	A	A	A	B	B	A	B	B
149	*BNL4030	-	-	-	-	-	-	-	-	-	-	-	-	-	-	-	-	-	-	-	-	-	-	-	-	-	-	-	-	-	-	A	A	A	B	B	A	A	B	B	A	A	A	A	B	B	B	A	A
150	*Gh327	B	A	-	A	-	B	-	B	-	-	B	-	-	A	-	-	-	B	A	A	A	A	A	B	B	-	A	A	A	A	A	A	A	A	A	A	A	A	A	-	B	A	A	A	A	A	-	-
151	*Gh454	A	A	A	B	A	-	A	B	A	B	B	B	A	A	A	B	A	B	B	A	A	A	A	A	B	A	A	A	B	B	A	A	B	A	A	A	A	A	A	B	B	B	A	A	A	A	B	B
152	*Gh273	A	A	A	A	A	-	-	A	A	-	A	-	A	A	A	A	A	-	A	-	A	A	A	A	A	A	-	-	A	A	A	A	-	-	A	A	A	A	A	-	A	A	-	-	A	A	-	-
153	*NAU3112	B	A	A	B	B	A	A	A	B	B	A	A	B	A	A	B	A	A	A	B	B	A	B	A	B	A	A	A	A	A	B	B	A	B	B	B	B	B	A	A	A	A	A	A	B	A	B	B
154	*SWU19434	B	A	A	B	A	B	A	A	A	B	A	A	B	B	A	B	A	A	B	B	B	A	B	A	B	A	A	A	B	B	A	A	B	A	A	B	B	A	B	A	A	B	A	B	B	A	A	A
155	*SWU19416	B	-	A	B	A	B	A	A	A	B	A	A	B	B	A	B	A	A	B	B	B	A	B	A	B	A	A	A	B	B	A	-	B	-	A	B	B	-	B	A	A	B	A	B	B	A	A	A
156	*SWU19431	B	A	A	B	A	B	A	A	A	B	A	A	B	B	A	B	A	A	B	B	B	A	B	A	B	A	A	A	B	B	A	A	B	A	A	B	B	-	B	A	A	B	A	B	A	B	A	A
157	*SWU19413	B	A	A	B	A	B	A	A	A	B	A	A	B	B	A	B	A	A	B	B	B	A	B	A	B	A	A	A	B	B	A	B	B	A	A	B	B	A	B	A	A	B	A	B	B	A	A	A
158	*SWU19411	B	A	A	B	A	B	A	A	A	B	A	A	B	B	A	-	A	A	B	B	B	A	B	A	B	A	A	A	B	B	A	A	B	A	A	B	B	A	B	A	A	B	A	B	B	A	A	A
159	*SWU19412	B	A	A	B	A	B	A	A	A	B	A	A	B	B	A	B	A	A	-	B	B	A	B	A	B	A	A	A	B	B	A	A	B	-	A	B	B	A	B	A	A	B	A	B	B	A	A	A
160	*MGHES31	B	B	B	A	A	B	-	B	-	-	A	-	-	A	B	B	B	A	B	B	-	B	B	-	A	-	B	A	A	B	B	A	-	A	B	B	A	A	A	-	-	A	A	A	A	A	-	-
161	*HAU1571	A	B	B	A	A	B	A	B	A	A	A	B	A	B	B	B	B	A	B	B	B	B	B	B	A	B	B	A	A	B	B	B	B	A	B	B	A	B	B	B	B	A	A	A	A	A	A	B
162	*DC30107	A	A	B	A	A	A	B	B	B	A	-	B	A	A	A	B	B	B	B	B	B	B	B	A	B	B	B	A	B	B	A	B	B	B	A	B	A	B	A	A	A	A	A	B	B	B	A	A
163	*NAU2715	B	A	A	A	A	B	A	A	A	B	B	B	A	B	A	A	B	B	B	B	B	-	B	A	B	A	A	A	A	B	B	B	A	A	B	B	A	B	A	-	A	A	B	B	B	A	A	A
164	*PGML2562	A	A	B	A	B	B	B	-	B	A	A	B	A	A	A	B	B	B	B	B	-	-	B	A	B	B	B	A	B	B	A	B	B	A	A	B	A	B	A	A	A	A	A	B	B	B	A	A
165	*DPL0070	A	A	B	A	-	A	B	B	B	A	A	B	A	A	A	B	B	B	B	B	B	B	B	A	B	B	B	A	B	B	A	B	B	B	A	B	A	B	A	A	A	A	A	B	B	B	A	A
166	*Gh64	A	A	B	A	A	B	B	A	B	A	B	B	B	A	B	B	B	A	B	B	B	B	B	A	A	B	B	A	A	B	B	-	-	B	A	B	A	B	B	A	-	B	A	A	B	B	-	-
167	*DPL0003	A	A	A	A	A	A	A	A	A	A	A	A	A	A	A	A	A	A	A	A	A	A	A	A	A	A	A	A	A	A	A	A	A	A	A	A	A	A	A	A	A	A	A	A	A	A	A	A
168	*ICR11957	A	A	A	A	A	A	A	A	A	A	A	A	A	A	A	A	A	A	A	A	A	-	A	A	A	A	A	A	A	A	A	A	A	A	A	A	A	-	A	A	A	A	A	A	A	A	A	A
169	*CGR6356	A	A	A	A	A	A	A	A	A	A	A	A	A	A	A	A	A	A	A	A	A	A	A	A	A	A	A	A	A	A	A	A	A	A	A	A	A	A	A	A	A	A	A	A	A	A	A	A
170	*SWU11632	B	B	A	B	A	B	B	B	B	B	B	B	B	A	B	B	-	B	B	A	B	B	B	B	A	B	B	B	B	A	A	B	B	B	A	B	B	B	B	B	A	A	B	B	B	B	B	A
171	*CGR6857	A	A	A	A	A	A	A	A	A	A	A	A	A	A	A	A	A	A	A	A	A	A	A	A	A	A	A	A	A	A	A	A	A	A	A	A	A	A	A	A	A	A	A	A	A	A	A	A
172	*DC20046	A	A	A	A	A	A	A	A	A	A	A	A	A	A	A	A	A	A	A	A	A	A	A	A	A	A	A	A	A	A	A	A	A	A	A	A	A	A	A	A	A	A	A	A	A	A	A	A
173	*HAU3071	-	-	-	B	B	A	A	A	A	B	B	B	B	A	A	A	B	B	B	A	A	B	A	B	A	A	B	B	A	A	A	B	A	A	B	A	A	A	B	B	A	A	A	A	A	A	B	A
174	*BNL3261	A	A	A	B	A	B	A	B	-	A	A	B	B	A	A	B	A	A	-	A	B	B	B	B	A	A	B	B	A	B	B	A	A	B	B	A	A	A	A	A	-	A	B	A	B	A	-	-
175	*CGR5111	A	B	A	B	A	B	A	B	A	B	A	B	B	A	A	B	A	A	A	A	B	B	B	B	A	B	B	B	A	B	B	B	A	B	B	A	A	A	A	A	A	A	B	A	B	A	B	A
176	*C2_0115	A	B	A	B	A	B	B	-	A	B	A	B	B	A	A	B	A	A	A	-	B	B	B	B	A	B	-	B	B	-	B	B	A	B	B	A	A	A	A	A	A	A	-	-	B	A	B	A
177	*ICR03107	-	-	-	-	-	-	-	-	-	-	-	-	-	-	-	-	B	-	B	-	B	-	A	-	A	B	B	B	A	A	B	B	A	B	B	B	A	A	A	A	B	A	B	A	B	A	B	-
178	*CER0168	A	A	A	A	A	A	A	A	A	A	A	A	A	A	A	A	A	A	A	A	A	A	A	A	A	A	A	A	A	B	A	A	A	A	A	A	A	A	B	A	A	A	A	A	A	B	B	B
179	*SWU21718	A	B	B	A	B	-	B	B	A	-	B	B	B	B	B	B	A	A	A	A	B	B	A	A	A	B	B	A	A	B	A	A	A	B	-	A	B	-	-	B	B	B	-	A	B	-	B	B
180	*TMB1638	-	-	A	B	A	A	B	-	B	A	-	B	A	A	A	A	B	-	A	-	-	-	A	A	A	A	A	B	B	-	A	A	-	A	A	B	-	B	A	A	-	B	A	B	-	-	-	-
181	*CGR6812	B	A	A	B	-	-	-	A	B	B	A	A	A	A	A	A	B	B	B	A	A	A	A	-	B	A	A	B	B	A	B	B	A	B	A	B	B	A	B	A	A	A	A	B	B	A	A	A
182	*DPL0057	B	B	A	A	A	-	-	B	-	-	B	-	-	A	A	-	A	A	A	B	B	B	B	B	A	-	B	B	A	B	B	A	-	B	A	A	A	A	A	-	B	A	B	B	A	A	-	-
183	*CGR6254	B	A	B	B	B	-	-	A	-	-	A	-	-	B	B	-	-	-	B	B	B	B	B	-	-	-	-	A	B	A	A	B	A	A	B	B	B	B	B	-	-	A	-	-	B	B	-	-
184	*SWU16755	A	B	A	A	A	A	B	A	B	A	A	A	A	A	A	A	A	B	B	A	A	B	A	B	A	B	B	A	A	A	A	A	B	A	B	B	B	A	A	B	B	A	B	-	B	B	A	B
185	*SWU16780	-	-	B	-	B	B	B	A	A	A	A	A	A	A	A	A	-	A	B	B	B	B	B	B	-	B	B	A	B	B	B	A	B	A	B	B	B	B	A	A	B	A	B	B	A	A	B	A
186	*SWU16777	A	A	B	A	B	B	B	A	B	A	A	A	A	A	A	A	B	A	B	B	B	B	B	B	A	B	B	A	B	B	B	A	B	A	B	B	B	B	A	A	B	A	B	B	A	A	B	A
187	*NAU2140	A	B	B	A	A	-	-	B	B	B	A	-	A	-	A	-	A	-	A	B	A	-	A	A	A	-	-	-	A	B	A	B	-	A	B	A	A	A	B	-	B	A	A	A	A	B	A	-
188	*BNL0827	B	A	B	B	A	A	A	B	B	A	A	A	A	A	A	A	B	A	B	A	A	B	A	A	A	B	B	B	B	A	B	B	B	A	A	A	B	B	B	A	A	B	A	B	B	A	A	A
189	*BNL2634	A	A	A	A	A	A	A	-	A	A	A	A	A	A	A	A	A	A	A	A	A	A	A	A	A	A	A	A	A	A	A	A	A	A	A	A	A	A	A	A	A	A	A	A	A	A	A	A
190	*BNL2786	A	A	A	B	A	A	A	B	A	B	B	A	A	A	A	B	B	A	A	B	A	A	A	A	B	A	A	A	A	B	A	A	-	B	B	B	B	A	A	B	-	B	A	B	B	B	B	A
191	*BNL3098	-	-	-	-	-	-	-	-	-	-	-	-	-	-	-	-	-	-	-	-	-	-	-	-	-	-	-	-	-	-	-	-	-	-	-	-	-	-	-	-	-	-	-	-	-	-	-	-
192	*BNL3259	A	A	A	A	A	A	A	A	A	A	A	A	A	A	A	A	A	A	A	A	A	A	A	A	A	A	A	A	A	A	A	A	A	A	A	A	A	A	A	A	A	A	A	A	A	A	A	A
193	*BNL3348	B	A	B	B	A	B	B	B	A	B	A	B	B	A	B	A	B	B	B	A	B	B	A	A	B	B	B	A	B	B	B	B	A	A	A	B	B	B	B	B	A	B	B	A	A	A	-	A
194	*BNL3482	A	A	A	A	A	-	-	-	A	A	B	A	A	A	B	A	A	-	-	-	B	A	B	A	B	-	-	A	A	A	-	B	B	A	A	A	A	A	B	B	A	A	A	A	-	-	-	-
195	*BNL3545	B	B	A	B	B	A	A	A	A	B	B	B	B	A	A	A	B	A	B	A	A	B	A	B	A	A	B	B	A	A	A	B	A	B	B	A	A	A	B	B	A	A	B	A	A	A	B	A
196	*BNL5602	A	B	B	B	A	A	A	B	A	B	B	B	A	A	B	B	B	A	B	A	B	B	B	B	A	B	B	B	B	B	A	A	B	B	A	B	B	A	A	B	B	B	B	B	A	A	B	A
197	*C2_0046	B	B	B	A	B	A	B	A	B	A	B	B	A	B	B	B	B	A	B	A	B	A	B	B	A	B	A	B	B	A	B	A	A	B	B	B	B	B	A	B	A	A	A	B	A	B	A	A
198	*CAU0234	A	B	B	B	A	A	A	B	A	B	B	B	A	A	A	B	A	B	A	A	B	B	B	A	B	A	B	A	B	B	A	B	A	B	B	A	B	B	A	B	B	B	A	B	B	A	B	A
199	*CGR5148	B	A	A	B	A	A	A	B	B	A	B	A	A	A	B	B	A	A	B	A	B	A	A	A	B	A	A	B	B	B	B	A	A	B	B	A	A	A	B	B	A	B	A	A	A	A	B	A
200	*CGR5158	B	B	B	B	B	B	B	B	B	B	B	B	B	B	B	B	B	B	B	B	B	B	B	B	B	B	B	B	B	A	A	B	A	A	B	B	B	B	B	B	B	A	A	A	A	A	A	A
201	*CGR5161	A	A	A	A	A	A	A	A	A	A	A	A	A	A	A	A	A	A	A	A	A	A	A	A	A	A	A	A	A	A	A	A	A	A	A	A	A	A	A	A	A	A	A	A	A	A	A	A
202	*CGR5282	B	B	A	B	B	B	A	B	A	B	B	B	A	B	A	B	B	B	B	A	A	A	B	A	B	B	A	B	A	A	A	B	B	B	B	B	B	A	A	A	A	A	A	B	B	A	A	A
203	*CGR5506	A	A	A	A	B	A	A	A	A	B	A	B	A	B	A	A	A	A	A	B	A	A	B	B	A	B	A	B	A	A	A	A	B	B	B	A	A	A	A	B	A	B	A	B	B	B	B	B
204	*CGR5553	A	A	A	A	B	B	B	B	A	B	B	B	A	A	B	B	B	A	B	B	A	B	A	B	A	A	B	B	B	A	B	A	A	B	A	B	B	B	A	B	A	A	A	B	A	A	B	B
205	*CGR5565	A	A	A	A	A	A	A	A	A	A	A	A	A	A	A	A	A	A	A	A	A	A	A	A	A	A	A	A	A	A	A	A	A	A	A	A	A	A	A	A	A	A	A	A	A	A	A	A
206	*CGR5748	B	A	A	B	A	A	A	B	B	A	B	A	A	A	B	B	A	A	B	A	B	A	A	A	B	B	A	B	B	B	B	B	A	B	B	A	A	A	B	B	A	B	A	A	A	A	B	B
207	*CGR5834	A	A	A	A	A	A	A	A	A	A	A	A	A	A	A	A	A	A	A	A	A	A	A	A	A	A	A	A	A	A	A	A	A	A	A	A	A	A	A	A	A	A	A	A	A	A	B	A
208	*CGR5925	B	A	B	A	A	B	B	B	A	B	A	A	A	B	A	A	A	A	A	B	A	A	B	B	A	B	A	B	A	A	A	A	B	A	B	A	A	A	A	B	A	A	A	B	B	B	B	B
209	*CGR6079	A	-	A	B	A	B	A	B	A	A	B	B	B	A	A	B	B	B	B	A	B	B	A	A	B	B	B	A	B	B	A	B	B	-	A	A	B	B	A	B	B	B	A	A	B	A	B	B
210	*CGR6378	A	A	A	A	A	A	A	A	A	A	A	A	A	A	A	A	A	A	A	A	A	A	A	A	A	A	A	A	A	A	A	A	A	A	A	A	A	A	A	A	A	A	A	A	A	A	A	A
211	*CGR6410	A	B	A	A	B	A	A	B	A	A	B	A	B	A	A	B	A	A	A	A	A	B	A	A	B	A	B	A	B	A	A	A	A	B	B	A	A	B	B	A	A	A	A	B	B	A	B	B
212	*CGR6477	-	B	B	A	B	-	B	B	-	B	A	-	-	A	B	-	B	A	B	B	B	B	B	-	-	-	B	A	A	B	B	B	-	B	B	B	A	B	A	-	B	B	A	A	B	B	-	A
213	*CGR6521	B	B	-	A	B	A	A	A	B	B	-	A	B	A	B	A	B	B	B	A	B	B	A	A	B	B	-	A	B	B	B	A	B	B	B	A	A	B	B	B	B	B	A	A	A	A	B	B
214	*CGR6772	A	B	B	A	B	A	B	B	-	B	A	A	A	A	A	A	B	A	B	B	A	B	A	B	A	B	B	B	B	B	B	B	A	A	A	B	A	A	B	B	B	A	B	B	A	A	B	B
215	*CGR6847	A	B	A	B	A	A	B	B	A	B	A	B	B	A	A	B	B	A	B	A	B	A	A	A	A	B	A	B	A	A	B	B	A	B	B	B	A	A	B	A	B	A	B	A	A	A	B	A
216	*CIR216	A	A	A	A	A	A	A	A	A	A	A	A	A	A	A	A	A	A	A	A	A	A	A	A	A	A	A	A	A	A	A	A	A	A	A	A	A	A	A	A	A	A	A	A	A	A	A	A
217	*CIR291	B	A	B	B	B	B	A	B	B	B	B	B	B	B	A	B	A	B	B	B	B	A	B	A	A	A	A	B	B	A	B	B	A	B	B	B	B	B	A	A	A	A	A	B	B	A	A	B
218	*DC30015	A	A	B	B	B	B	A	A	A	B	B	A	A	B	A	B	A	A	B	B	A	B	A	B	A	A	B	A	B	A	B	B	A	B	A	B	B	A	A	A	B	A	B	B	A	A	B	B
219	*DC40130	A	A	B	B	A	B	B	B	B	A	B	A	A	B	B	B	B	B	A	-	A	B	A	A	A	B	B	B	A	A	A	B	A	A	B	B	A	A	B	A	B	A	A	B	A	A	A	A
220	*DC40286	B	B	B	B	B	B	B	B	B	B	B	B	B	B	B	B	B	B	B	B	B	B	B	B	B	B	B	B	B	B	B	B	B	B	B	B	B	B	B	B	B	B	B	B	B	B	B	B
221	*DPL0041	A	-	A	A	-	-	A	B	A	B	A	B	A	B	B	B	B	-	B	B	A	B	B	A	B	B	B	A	A	A	A	B	B	A	A	B	B	B	A	A	B	B	A	B	B	B	B	A
222	*DPL0171	B	A	A	A	B	B	B	B	B	A	B	A	A	B	B	A	A	B	A	B	B	B	B	B	B	A	B	B	A	A	A	B	A	B	B	B	A	B	A	A	A	B	A	B	A	B	B	A
223	*DPL0200	B	A	B	B	B	-	-	A	A	A	-	-	-	A	A	-	A	-	-	-	-	-	A	A	A	A	-	B	B	B	B	-	-	B	B	A	A	A	B	-	A	B	B	A	B	B	-	-
224	*DPL0270	A	B	A	B	A	A	A	A	B	B	B	A	A	A	A	A	A	A	A	A	B	B	B	A	A	B	B	B	A	A	B	A	B	A	A	B	A	A	A	B	A	B	A	A	B	B	A	A
225	*DPL0377	B	A	A	B	A	B	A	A	-	-	A	A	A	A	A	A	A	A	B	B	B	A	B	-	B	A	A	B	B	-	A	A	A	A	A	B	B	-	B	-	A	B	B	-	B	A	-	-
226	*DPL0400	B	A	B	B	A	B	B	B	A	B	A	A	B	A	A	A	B	A	B	B	B	A	A	A	A	B	A	B	B	B	B	B	A	A	B	A	B	A	B	B	B	B	A	A	B	A	B	A
227	*DPL0573	A	B	B	A	B	A	A	B	B	A	A	A	A	B	A	B	B	A	B	B	A	A	B	B	A	A	A	A	B	B	A	A	B	A	B	A	A	A	B	B	A	A	B	A	B	B	A	B
228	*DPL0847	B	A	A	A	A	B	-	B	A	B	B	-	B	B	A	-	-	-	B	B	B	A	B	-	-	-	A	A	A	B	B	A	A	A	B	B	A	A	A	-	-	A	B	B	B	A	-	-
229	*DPL0919	B	A	A	B	A	B	B	B	-	-	B	-	-	A	B	-	B	B	A	B	B	B	B	-	B	-	B	B	B	A	B	A	-	A	B	A	A	A	B	B	B	B	B	A	A	B	-	-
230	*Gh132	B	A	A	B	A	A	A	B	B	A	A	B	A	A	B	A	B	A	B	A	B	B	A	A	B	A	B	A	B	B	B	A	B	A	B	A	A	B	B	B	B	B	A	A	A	A	B	A
231	*Gh187	A	B	B	B	A	B	A	A	B	A	A	B	A	A	A	A	B	A	B	B	A	A	A	B	B	A	A	A	B	A	A	A	A	A	A	B	B	A	A	A	A	A	B	B	B	B	B	B
232	*Gh222	B	B	B	B	B	B	B	B	B	B	B	B	B	B	B	B	B	B	B	B	B	B	B	B	B	B	B	B	B	B	B	B	B	B	B	B	B	B	B	B	B	B	B	B	B	B	B	B
233	*Gh243	A	B	B	A	B	B	B	B	A	B	A	B	A	B	A	B	B	A	B	A	B	B	B	A	B	B	B	A	B	A	B	B	A	A	B	A	A	A	B	B	B	B	A	B	A	A	B	A
234	*Gh450	B	A	A	B	A	A	A	B	B	A	A	A	A	A	B	A	B	A	B	A	B	B	A	A	B	A	-	A	B	B	B	A	B	-	B	A	-	B	B	B	B	B	A	A	A	A	B	A
235	*Gh54	A	A	A	B	A	-	A	B	A	B	B	B	A	A	A	B	A	B	B	A	-	-	A	A	B	A	A	A	B	B	A	A	B	A	A	A	A	A	A	B	B	B	A	A	A	A	B	B
236	*Gh568	A	A	A	B	A	B	A	B	B	A	A	B	B	A	A	B	A	A	A	A	B	B	B	B	A	A	B	B	A	B	B	A	A	B	B	B	A	A	A	A	A	A	B	A	B	A	B	A
237	*Gh584	B	A	B	A	B	B	A	B	B	A	B	A	A	B	B	A	A	B	A	B	B	B	B	B	B	A	B	B	A	B	B	B	B	B	A	B	A	B	A	A	B	A	A	B	A	B	B	A
238	*Gh86	-	A	A	A	A	B	A	A	B	B	A	A	A	A	A	A	A	A	A	A	A	A	A	B	A	A	A	A	A	A	A	A	A	-	A	A	A	A	A	A	A	A	A	A	A	A	A	A
239	*HAU0016	A	B	B	B	A	A	A	B	B	A	A	A	A	A	B	B	B	A	A	A	A	A	B	B	B	B	B	B	B	B	B	A	A	A	B	A	A	A	A	A	A	A	A	A	B	A	-	B
240	*HAU0244	A	A	A	A	A	B	B	-	-	B	A	-	B	A	A	A	B	B	A	-	A	A	-	B	B	B	B	A	A	A	A	A	B	A	A	A	A	-	A	-	-	-	A	A	A	A	-	-
241	*HAU0355	A	B	B	A	B	-	-	-	A	B	A	A	A	A	A	A	B	A	B	B	B	B	B	B	A	B	B	B	B	B	B	A	B	B	B	A	B	B	B	A	B	A	B	B	A	A	B	B
242	*HAU0800	B	A	B	A	A	A	B	B	-	B	A	A	B	B	B	A	B	B	B	A	B	A	A	A	A	A	A	B	A	B	A	B	A	B	A	A	B	B	B	A	-	A	B	A	B	B	-	-
243	*HAU0810	A	B	A	B	B	B	B	A	A	A	A	B	A	B	B	A	B	B	B	A	A	B	B	A	A	B	B	B	A	A	A	B	A	A	B	A	B	B	B	B	A	B	-	B	A	-	B	A
244	*HAU0883	-	-	-	-	-	-	-	-	-	-	-	-	-	-	-	-	-	-	-	-	-	-	B	A	A	B	B	-	-	-	A	A	B	B	B	A	B	B	B	A	-	B	B	A	B	A	A	B
245	*HAU1000	A	B	B	A	B	A	A	A	A	B	B	B	B	B	A	A	B	B	B	A	A	A	A	B	A	A	A	A	A	B	A	B	B	A	B	A	B	A	A	A	B	B	B	A	B	A	B	B
246	*HAU1177	A	B	B	B	A	B	B	B	B	A	B	A	B	A	A	B	B	B	A	A	A	B	A	B	B	A	A	A	B	B	B	-	B	B	A	B	A	A	B	A	B	A	A	B	B	B	B	B
247	*HAU1224	A	A	B	B	A	A	A	A	B	B	B	A	B	A	B	A	A	B	A	B	A	A	-	B	B	B	B	A	B	B	B	A	A	A	A	B	A	A	A	A	B	A	B	A	A	A	A	A
248	*HAU1314	B	B	B	B	A	-	-	-	A	-	A	-	-	A	A	-	-	-	B	B	A	A	B	-	-	-	B	B	A	A	B	A	A	B	A	A	A	B	A	-	-	B	B	B	A	B	-	-
249	*HAU1355	B	A	A	B	A	A	A	A	A	B	A	A	B	A	A	B	A	B	A	B	B	A	B	A	B	A	A	A	A	A	B	B	A	B	B	B	B	A	B	A	A	A	A	A	B	A	B	B
250	*HAU1367	A	A	B	B	B	-	-	B	A	B	B	A	A	A	B	-	B	-	-	-	A	-	A	A	A	A	-	-	A	B	-	-	B	B	A	B	B	A	B	-	A	B	A	A	A	A	B	-
251	*HAU1758	A	A	A	A	A	A	B	B	B	B	B	B	B	A	A	B	B	B	A	A	A	A	A	B	B	B	B	A	A	A	A	A	B	A	A	A	A	A	A	B	-	A	A	A	A	A	-	-
252	*HAU1873	A	A	A	B	B	B	A	A	A	B	A	A	A	B	A	A	B	A	B	A	B	B	A	B	A	A	B	B	B	A	B	A	B	A	A	A	B	A	A	A	B	B	B	B	A	B	B	B
253	*HAU1908	A	B	B	A	B	A	A	A	B	A	B	B	A	B	B	B	A	B	B	A	B	A	B	A	B	B	A	A	B	B	B	A	B	A	B	B	A	A	A	A	B	B	B	B	B	A	A	A
254	*HAU2022	B	A	B	B	B	B	B	B	B	A	-	-	B	-	B	B	B	A	B	B	B	B	B	-	B	B	B	B	B	B	B	B	B	A	B	A	B	B	B	A	A	B	A	B	B	A	A	A
255	*HAU2173	B	A	B	B	A	B	A	B	B	B	A	A	B	A	A	A	A	A	B	B	B	A	A	A	A	B	A	A	B	B	B	B	B	A	A	A	B	A	B	B	B	B	A	A	A	A	B	A
256	*HAU2482	A	A	A	A	A	A	A	A	A	A	-	-	-	A	A	A	-	-	A	A	A	A	A	A	A	-	-	A	A	A	A	A	-	A	A	A	A	A	A	A	A	A	A	A	A	A	-	-
257	*HAU2489	B	B	A	B	B	B	A	A	B	A	B	B	B	B	A	A	A	A	A	A	B	A	A	B	B	B	A	A	A	A	A	A	A	A	A	B	A	B	A	A	A	B	B	B	B	B	B	-
258	*HAU2530	B	B	B	A	A	A	A	A	B	A	B	B	A	B	B	B	B	B	A	B	A	B	B	B	B	B	B	B	B	A	B	A	A	A	B	B	B	B	A	B	A	A	A	B	A	B	A	A
259	*HAU2648	B	A	A	A	A	B	B	B	B	A	B	B	A	A	B	A	B	B	B	A	B	B	B	B	-	A	B	A	A	B	B	A	B	B	A	A	A	A	B	B	A	A	B	B	B	A	A	B
260	*HAU2786	A	A	A	B	A	A	B	B	B	B	A	B	B	A	B	A	B	B	A	B	B	A	A	B	B	A	A	A	A	A	A	A	B	A	B	B	B	A	B	B	B	B	A	B	A	A	B	B
261	*HAU2850	A	B	B	A	B	A	A	A	B	A	B	B	A	B	B	B	A	B	B	A	B	A	B	A	B	B	A	B	B	B	B	A	B	A	B	B	A	A	A	A	B	B	B	B	B	A	A	A
262	*HAU2937	B	A	A	A	B	B	B	A	A	A	A	A	B	B	A	A	A	A	A	B	A	A	A	A	B	A	A	A	A	A	A	B	A	A	B	A	A	A	B	A	A	A	A	A	A	B	A	B
263	*HAU3012	B	A	A	-	A	A	A	-	-	-	-	-	-	B	A	A	A	A	A	B	B	A	B	-	-	-	-	A	B	B	A	A	-	A	A	B	B	A	B	-	-	B	B	B	B	A	-	-
264	*HAU3076	A	A	A	B	A	B	A	B	A	A	B	B	B	A	A	B	B	B	B	A	B	B	A	A	B	B	B	B	B	B	A	A	B	B	A	A	B	A	A	B	B	B	A	A	B	A	B	B
265	*HAU3081	B	A	B	A	B	B	-	-	-	-	-	-	-	B	A	-	-	B	B	A	A	A	B	-	-	-	B	A	A	A	A	A	B	B	B	B	B	A	B	B	-	A	A	B	A	A	-	-
266	*HAU3373	A	B	B	B	A	B	B	B	A	B	A	B	A	A	A	B	B	A	B	A	B	A	A	A	A	A	B	A	A	A	B	B	-	A	B	A	A	A	A	A	B	B	B	B	B	A	B	A
267	*ICR00401	-	-	A	A	B	A	B	A	A	A	A	A	B	B	A	A	A	A	B	A	A	A	A	A	A	B	A	A	B	B	A	A	A	B	B	B	B	A	A	A	A	B	B	A	A	A	-	B
268	*ICR01124	A	A	A	A	A	-	A	A	B	A	A	A	A	-	A	-	A	A	-	-	-	-	A	A	A	A	-	-	-	A	A	B	-	-	A	A	B	A	A	-	A	A	A	B	A	A	-	-
269	*ICR01334	B	A	A	B	A	-	-	B	A	-	A	B	A	A	A	B	A	-	B	A	A	-	B	A	-	-	-	-	A	A	B	B	-	B	A	A	A	B	A	-	B	B	B	B	A	B	-	-
270	*ICR02249	A	A	A	A	A	-	-	-	A	-	-	-	-	A	A	-	-	A	A	A	A	A	A	-	-	-	-	A	A	A	A	A	-	A	A	A	A	A	A	-	-	B	A	A	A	A	-	-
271	*ICR03105	A	A	A	A	A	A	A	B	A	A	A	A	A	B	A	-	B	B	A	A	A	B	A	-	A	A	B	B	A	A	A	A	A	-	A	B	B	A	A	A	A	A	A	B	A	A	A	-
272	*ICR03943	A	A	A	A	A	-	-	-	A	-	-	-	-	A	A	-	-	A	A	A	A	A	A	-	-	-	-	A	A	A	A	A	-	A	A	A	A	A	A	-	-	B	A	A	A	A	-	-
273	*ICR06429	B	B	B	B	B	A	B	-	-	-	B	-	B	A	-	-	A	A	B	B	-	-	-	-	A	A	-	A	A	A	-	-	-	A	A	A	A	A	-	A	A	A	A	-	A	B	A	B
274	*ICR07597	A	A	A	B	A	-	-	A	B	B	A	B	B	A	B	B	-	-	A	A	B	A	A	B	B	B	B	B	B	A	A	-	B	B	A	A	B	A	-	B	A	B	B	B	A	-	-	-
275	*ICR07780	B	B	A	A	A	-	-	B	A	B	B	B	A	-	B	B	A	-	A	-	B	A	A	A	A	A	-	-	-	A	A	B	A	B	-	-	-	-	B	B	B	B	B	-	A	A	-	-
276	*ICR12281	A	A	A	A	A	A	A	A	A	A	A	B	A	A	B	A	B	A	B	A	A	A	A	A	A	A	-	A	A	A	A	B	A	A	A	A	A	A	A	A	A	A	A	A	A	A	A	-
277	*JESPR234	B	A	A	A	B	A	A	B	B	A	B	A	A	A	A	B	B	B	B	B	A	B	A	A	B	B	B	A	B	B	A	A	A	B	A	A	A	A	A	-	A	B	B	A	B	A	B	-
278	*JESPR251	A	B	B	B	A	A	A	B	A	A	B	B	A	A	B	B	B	B	B	A	B	A	B	B	B	B	A	B	B	B	B	A	B	B	B	B	B	B	A	A	A	B	B	B	B	A	B	A
279	*MGHES06	A	A	B	B	B	B	A	A	B	B	B	A	B	B	A	B	B	A	B	A	B	B	A	B	A	A	B	A	B	A	B	A	A	B	A	B	A	B	A	A	B	A	B	B	B	A	B	B
280	*MUSB1144	A	B	B	A	A	A	B	A	A	B	B	A	A	A	B	A	B	B	A	A	A	B	B	A	B	A	A	A	B	B	A	A	B	A	A	B	A	A	B	A	B	B	B	B	B	B	B	A
281	*MUSB1164	B	A	B	B	B	B	A	A	B	A	B	B	B	B	A	B	A	B	B	B	B	A	B	A	A	A	A	B	B	A	B	B	A	B	B	B	B	B	A	A	A	A	A	B	B	A	A	B
282	*MUSB886	A	A	A	-	-	A	-	-	-	-	-	-	B	A	A	B	B	B	B	B	A	B	A	-	-	-	-	B	B	B	B	A	-	A	B	-	A	A	B	A	A	A	A	B	A	A	-	-
283	*MUSB994	A	-	B	A	B	A	B	-	B	A	B	B	A	A	B	A	B	B	A	A	A	B	A	B	A	B	B	B	A	A	B	B	A	B	B	A	A	B	A	B	B	A	B	A	A	B	B	B
284	*MUSS139	A	A	B	B	B	B	A	A	B	B	B	A	B	B	A	B	B	A	B	A	B	B	A	B	A	A	B	A	B	A	B	B	A	B	A	B	A	B	A	A	B	A	B	B	B	A	B	B
285	*MUSS278	B	A	A	B	A	A	A	B	A	B	A	A	B	B	B	B	B	B	A	A	A	B	A	B	A	B	B	B	B	B	B	B	A	A	B	B	B	B	B	B	A	A	B	B	A	A	A	A
286	*NAU0483	A	A	B	B	B	B	A	A	B	B	B	B	A	B	A	B	B	A	B	B	A	B	A	A	A	B	B	A	B	A	B	B	A	B	B	B	B	B	A	A	B	A	B	A	B	A	B	A
287	*NAU0748	B	A	A	B	B	B	B	B	B	B	B	A	A	A	B	A	A	A	A	A	B	B	B	B	A	B	B	A	A	A	B	B	A	B	B	B	B	B	A	B	A	A	B	B	A	B	A	A
288	*NAU2238	A	B	B	A	B	A	B	B	B	A	B	B	A	A	B	A	B	B	A	A	A	B	A	B	A	B	B	B	A	A	B	B	A	B	B	A	A	B	A	B	B	A	B	B	A	B	A	B
289	*NAU2450	A	A	A	B	A	B	A	A	A	A	B	A	B	B	A	A	A	A	A	A	A	A	A	A	A	B	A	A	A	A	A	A	A	A	B	A	A	A	B	B	B	B	B	A	B	A	A	A
290	*NAU2697	B	B	A	A	B	B	A	B	A	B	A	A	A	A	B	B	B	A	B	A	B	B	B	B	B	A	A	B	B	B	A	B	B	A	B	B	A	B	A	A	A	A	A	A	B	B	A	A
291	*NAU2768	-	-	-	-	-	-	-	-	-	-	-	-	-	-	-	-	-	-	-	-	-	-	-	-	-	-	-	-	-	-	-	-	-	-	-	-	-	-	-	-	-	-	-	-	-	-	-	-
292	*NAU2816	A	A	B	B	A	B	B	B	B	B	B	B	A	A	A	B	A	B	B	B	B	B	A	A	A	B	B	B	A	A	B	B	A	B	B	B	B	B	A	A	B	A	A	B	B	A	A	A
293	*NAU2968	B	A	A	B	A	B	A	A	B	B	A	A	A	B	A	B	A	A	A	B	B	A	B	A	B	-	A	A	B	B	A	A	B	A	A	B	B	B	A	A	A	B	B	B	B	B	B	A
294	*NAU2971	B	A	A	A	A	B	A	A	A	B	B	B	A	B	A	A	B	B	B	B	B	A	B	A	B	A	A	A	A	B	B	B	A	A	B	B	A	B	A	B	A	A	B	B	B	A	A	A
295	*NAU3086	A	A	A	A	A	A	A	A	A	A	B	A	B	A	A	A	A	A	A	B	A	B	A	A	B	A	A	B	A	B	A	B	A	A	A	A	A	B	B	A	B	A	A	A	B	B	B	B
296	*NAU3109	A	B	A	A	A	B	B	B	B	B	B	A	A	B	A	A	A	A	B	B	A	B	B	B	B	B	A	B	A	A	B	A	B	B	A	A	A	A	B	B	B	B	B	B	A	A	B	B
297	*NAU3186	A	B	A	A	B	B	A	B	A	B	B	A	B	A	A	B	B	A	B	B	B	A	B	A	B	A	A	B	A	B	A	A	A	B	A	A	B	A	A	A	A	B	B	B	A	B	A	B
298	*NAU3393	B	B	B	B	A	A	A	A	B	A	B	B	B	A	B	A	A	A	A	B	B	A	B	A	B	A	A	A	A	B	A	A	B	A	A	B	B	A	A	A	B	A	B	A	A	B	A	B
299	*NAU3395	A	B	B	B	A	B	A	B	B	B	B	B	A	B	A	B	A	B	A	A	B	B	B	A	A	A	A	A	B	A	A	B	A	B	B	A	B	B	A	A	B	A	B	B	A	B	A	A
300	*NAU3398	A	B	B	A	B	A	A	A	B	A	B	B	A	B	B	B	A	B	B	A	B	A	B	A	B	B	A	A	B	B	B	A	B	A	B	B	A	A	A	A	B	B	B	B	B	A	A	A
301	*NAU3495	A	A	A	A	A	A	A	A	A	A	A	A	A	A	A	A	A	A	A	A	A	A	A	A	A	A	A	A	A	A	A	A	A	A	A	A	A	A	A	A	A	A	A	A	A	A	A	A
302	*NAU3588	A	B	B	A	B	A	B	B	B	A	B	B	B	A	B	A	B	B	A	A	B	B	A	B	A	A	B	B	A	A	B	B	A	B	B	A	A	B	A	B	B	A	A	A	A	B	B	B
303	*NAU3995	A	A	A	A	B	A	A	B	A	B	B	B	A	A	A	B	B	B	B	B	A	A	A	B	A	A	A	A	B	B	B	-	B	B	A	B	A	A	A	A	B	B	A	A	A	B	A	A
304	*NAU4964	B	A	A	B	B	A	A	A	A	B	A	A	B	A	A	B	A	A	A	B	B	A	B	A	B	A	A	A	A	A	B	B	A	B	B	B	B	B	B	A	A	A	A	A	B	A	B	B
305	*NAU4967	A	B	A	B	A	A	A	B	A	B	B	B	A	A	A	B	A	B	A	A	B	B	B	A	B	A	B	A	B	B	A	B	A	B	B	A	B	B	A	B	B	B	A	A	B	A	B	A
306	*NAU5373a	A	B	B	A	B	A	B	B	B	A	B	B	B	A	B	A	B	B	B	A	A	B	A	B	A	A	B	B	A	A	B	B	A	A	B	A	A	A	A	B	B	A	A	A	A	B	A	B
307	*NAU5373b	A	B	B	A	B	A	B	B	B	A	B	B	B	A	B	A	B	B	B	A	A	B	A	B	A	A	B	B	A	A	B	B	B	B	B	A	A	A	A	B	B	A	A	A	A	B	A	B
308	*NAU5480	A	B	A	B	A	A	B	B	B	B	B	A	A	A	A	A	A	A	A	A	B	B	B	A	B	B	B	B	A	A	B	A	B	A	A	B	A	A	A	B	A	B	A	A	B	B	A	A
309	*NAU6393	-	-	-	-	-	-	-	-	-	-	-	-	-	-	-	-	-	-	-	-	-	-	-	-	-	-	-	-	-	-	A	A	B	B	A	B	A	B	B	A	A	A	B	B	A	B	A	A
310	*NAU6411	A	A	A	A	A	A	A	A	A	A	A	A	A	A	A	A	A	A	B	A	A	A	A	A	A	A	A	A	A	A	A	A	A	A	A	A	A	A	A	A	A	A	A	A	A	A	A	A
311	*NAU747	B	A	B	A	B	B	B	A	B	-	B	B	-	B	A	B	-	-	B	A	A	A	B	-	-	-	A	A	A	A	A	A	-	B	B	B	B	B	B	-	-	A	A	B	A	A	-	-
312	*NAU878	A	A	A	A	A	A	A	A	A	A	A	A	A	A	A	A	A	A	A	A	A	A	A	A	A	A	A	A	A	A	A	A	A	A	A	A	A	A	A	A	A	A	A	A	A	A	A	A
313	*PGML0009	A	A	A	A	A	A	A	A	A	A	A	A	A	A	A	A	A	A	A	A	A	A	A	A	A	A	A	A	A	A	A	A	A	A	A	A	A	A	A	A	A	A	A	A	A	A	A	A
314	*PGML0419	B	B	B	A	B	B	B	B	B	A	B	A	B	A	A	B	A	A	A	B	B	A	B	B	A	A	B	A	B	A	A	B	A	B	A	A	A	B	A	A	B	A	B	A	B	A	A	B
315	*PGML0698	A	A	A	A	A	A	A	A	A	A	A	A	A	A	A	A	A	A	A	A	A	A	A	A	A	A	A	A	A	A	A	A	A	A	A	A	A	A	A	A	A	A	A	A	A	A	A	A
316	*PGML0844	B	A	B	B	A	A	A	-	B	A	A	A	A	A	A	A	B	A	B	A	A	B	A	A	A	B	B	B	B	A	B	B	B	A	B	A	B	B	B	B	A	A	B	A	B	A	A	A
317	*PGML1207	-	-	A	A	-	-	B	-	A	A	B	B	B	B	B	B	A	A	A	B	B	B	A	A	B	B	A	A	B	B	B	A	A	B	A	B	A	B	A	B	B	B	B	A	A	A	B	B
318	*PGML1434	B	B	B	B	B	B	B	B	A	B	B	B	A	B	B	B	B	B	B	A	B	B	A	B	B	B	B	A	B	B	B	B	B	B	A	A	B	B	A	B	B	B	B	A	B	B	B	B
319	*PGML1942	A	A	B	B	A	B	A	-	B	B	A	A	A	B	A	B	B	B	B	B	B	A	A	B	B	A	A	A	B	B	A	A	B	A	B	A	B	A	B	A	B	A	B	A	B	A	A	A
320	*PGML2500	B	A	A	B	A	A	A	-	B	A	B	A	A	A	B	A	A	A	B	A	B	B	B	A	A	B	B	B	B	B	B	A	A	B	B	A	A	A	A	B	A	-	A	A	A	A	B	B
321	*PGML3983	B	B	A	B	A	A	A	-	A	B	A	B	B	A	A	A	B	B	B	A	A	B	A	B	A	A	B	B	A	A	A	B	A	B	B	A	A	A	B	B	A	A	B	B	A	A	B	A
322	*PGML4154	B	A	B	A	A	A	B	A	B	B	B	A	A	A	B	A	B	A	A	A	A	B	B	B	A	B	B	A	B	B	B	B	A	A	B	B	A	B	B	B	B	A	B	A	B	A	B	B
323	*PGML4891	B	B	B	A	A	-	-	A	A	A	-	-	-	A	B	B	B	-	A	A	B	B	-	B	B	-	B	B	B	B	B	A	A	A	A	B	A	A	B	B	-	A	A	B	A	B	A	A
324	*PGML4939	A	A	A	A	A	A	A	A	A	A	A	A	A	A	A	A	A	A	A	A	A	A	A	A	A	A	A	A	A	A	A	A	A	A	A	A	A	A	A	A	A	A	A	A	A	A	A	A
325	*SHIN0071	B	B	B	A	A	A	B	A	B	A	B	B	A	B	B	A	B	A	B	B	A	B	A	B	A	A	B	A	B	A	A	B	A	B	B	B	A	A	B	A	B	B	B	A	B	B	A	A
326	*SHIN0272	A	B	A	B	B	B	A	B	A	B	B	B	B	A	A	B	B	B	B	B	B	A	A	A	A	A	A	B	A	B	B	A	B	-	A	A	B	B	A	A	A	A	A	B	A	A	A	A
327	*SHIN0337	B	B	A	B	A	A	A	B	B	A	B	A	B	A	B	B	B	A	B	A	B	A	A	A	B	B	A	B	B	B	B	B	A	B	B	A	A	A	B	B	A	B	A	A	A	A	B	B
328	*SHIN0830	A	A	B	A	B	B	A	B	B	A	B	A	A	B	B	A	A	B	A	B	B	B	-	B	B	A	B	B	A	B	B	B	B	B	A	B	A	B	A	A	B	A	A	B	A	B	B	A
329	*SHIN1076	A	A	A	A	A	B	-	B	-	-	B	-	-	A	A	-	B	B	A	A	A	A	A	-	B	-	B	A	A	A	A	A	B	A	A	A	A	A	A	-	-	A	A	A	A	A	A	A
330	*SWU0058	B	A	A	A	A	A	A	B	B	A	A	A	A	A	A	A	A	A	A	A	A	A	A	A	A	A	A	A	A	A	A	A	A	B	A	A	A	A	A	A	A	A	A	A	A	A	A	A
331	*SWU0268	B	-	B	A	-	-	-	-	B	A	B	A	-	-	-	-	A	B	B	B	A	A	B	A	A	A	A	B	B	A	B	B	A	B	B	B	B	B	A	A	A	A	A	B	B	A	B	B
332	*SWU0320	B	B	B	A	B	B	A	B	A	B	A	A	A	B	B	B	B	B	B	B	B	B	B	B	B	A	B	B	B	B	B	B	B	B	B	B	B	B	B	A	B	A	A	B	B	B	A	A
333	*SWU0356	B	A	B	A	A	A	A	B	A	A	A	A	B	A	A	B	A	A	A	B	B	A	A	B	B	A	A	A	B	B	B	A	B	B	A	B	A	A	A	A	B	A	B	A	A	A	A	A
334	*SWU0506	A	A	B	B	A	A	A	A	B	B	B	B	A	A	A	A	B	B	B	B	A	A	A	A	B	B	A	B	A	A	A	A	A	B	B	B	A	A	A	A	A	A	B	B	A	B	A	B
335	*SWU0664	A	A	A	A	A	A	A	A	A	A	A	A	A	A	A	A	A	A	A	A	A	A	A	A	A	A	A	A	A	A	A	A	A	A	A	A	A	A	A	A	A	A	A	A	A	A	A	A
336	*SWU0738	A	B	B	A	B	A	B	B	A	A	B	B	B	B	B	B	A	A	A	B	B	B	B	A	A	B	B	A	A	B	A	A	B	A	B	A	A	B	A	B	B	B	B	A	A	B	B	B
337	*SWU10211	A	B	A	B	A	A	A	A	A	A	B	A	A	B	A	A	B	B	B	B	B	A	B	B	A	A	A	A	A	A	B	A	B	A	B	B	B	A	B	B	B	A	B	B	B	B	B	B
338	*SWU12001	-	B	B	A	B	B	A	A	A	A	A	B	A	B	A	A	-	A	B	B	B	B	A	A	B	A	B	B	A	A	A	A	B	B	A	B	B	B	B	A	B	B	A	A	A	-	B	B
339	*SWU13030	A	B	A	B	A	-	A	B	A	B	B	B	A	A	A	B	A	B	A	A	B	B	B	A	B	A	B	A	B	B	A	A	A	B	B	A	B	B	A	B	B	B	A	B	B	A	B	A
340	*SWU13100	A	A	A	B	-	B	A	B	A	A	B	B	B	A	A	B	B	B	B	A	B	B	A	A	B	B	B	A	B	B	A	B	B	B	A	A	B	B	A	B	B	B	A	-	B	A	B	B
341	*SWU13121	A	A	A	B	A	B	A	B	A	A	B	B	B	A	A	B	A	B	A	A	B	B	A	A	B	B	B	A	B	B	A	B	B	B	A	A	B	B	A	B	B	B	A	A	B	A	B	B
342	*SWU14077	B	B	B	B	A	A	A	A	B	A	B	B	B	A	B	A	-	A	A	B	B	A	B	A	B	A	A	A	A	B	A	-	B	-	A	B	B	-	A	A	B	A	B	A	A	B	A	B
343	*SWU14490	B	B	B	-	B	B	A	A	A	A	B	B	-	A	B	A	A	B	A	A	B	A	A	-	B	A	A	-	A	B	A	-	B	A	A	B	B	B	A	A	A	A	B	A	B	B	A	A
344	*SWU14514	B	B	B	-	B	B	A	A	A	A	B	B	A	A	B	A	A	A	A	B	B	A	B	A	B	A	A	A	A	B	A	-	B	-	-	B	B	B	A	A	A	A	B	B	B	-	-	A
345	*SWU14616	B	B	B	A	A	B	A	A	B	A	B	A	B	B	A	A	A	A	A	B	B	A	B	A	B	A	A	A	A	A	B	A	B	A	A	A	B	A	A	-	A	A	B	B	B	B	B	B
346	*SWU16360	B	A	A	-	B	A	A	B	B	A	B	B	A	B	B	A	B	B	A	B	B	-	B	B	B	B	B	A	A	A	B	B	B	A	B	B	B	B	A	B	B	B	-	-	A	B	B	A
347	*SWU16361	B	A	A	A	B	A	A	B	B	A	B	B	A	-	B	A	B	B	A	B	B	A	-	B	B	-	B	-	A	-	B	B	B	A	B	B	B	B	-	B	B	B	A	A	A	B	B	A
348	*SWU16370	-	A	A	B	A	A	A	B	B	A	B	A	A	A	B	B	A	-	B	A	B	A	A	A	B	A	A	B	B	B	B	B	-	B	B	A	A	A	B	B	A	B	A	A	A	A	B	B
349	*SWU16408	B	A	A	A	B	-	A	B	B	A	B	B	A	-	A	A	B	B	A	B	B	A	-	B	B	B	B	A	-	A	B	B	B	A	B	B	B	B	A	B	B	A	A	A	-	B	A	A
350	*SWU16432	-	B	A	B	B	B	B	-	A	B	A	B	A	A	B	A	B	A	B	-	B	-	A	B	B	A	A	A	A	A	B	B	B	A	-	B	B	B	B	B	-	B	B	B	-	B	B	B
351	*SWU16437	B	B	A	B	B	B	B	A	A	B	A	A	A	A	B	A	B	A	B	B	B	A	-	B	B	A	A	A	A	A	B	B	B	A	B	B	B	B	B	B	A	B	B	B	B	A	B	B
352	*SWU16493	B	A	A	B	A	A	A	B	B	A	A	B	A	A	B	A	B	A	B	A	B	B	A	A	B	A	B	A	B	B	B	A	-	-	B	A	A	B	B	B	B	B	A	A	A	A	B	A
353	*SWU16680	-	B	B	A	A	A	B	A	B	A	B	B	A	A	B	B	A	B	A	-	A	-	B	B	B	B	B	A	A	A	B	A	B	A	B	B	A	A	B	B	A	A	A	A	-	B	A	B
354	*SWU16721	A	A	A	A	A	B	A	B	A	A	A	A	A	-	B	A	B	B	A	A	-	A	B	A	B	B	A	A	A	A	A	B	A	B	B	A	A	A	-	A	A	B	B	A	A	-	-	B
355	*SWU16730	A	B	A	A	A	A	B	A	B	A	-	A	A	A	-	B	A	B	B	A	A	B	B	B	B	B	B	A	A	A	A	A	B	A	B	B	A	A	A	B	A	A	B	B	A	A	A	B
356	*SWU16732	A	B	A	A	A	A	B	A	B	A	A	A	A	A	B	B	A	B	B	A	A	B	A	B	A	B	-	A	A	A	A	A	B	A	B	B	A	A	A	B	A	A	B	B	A	A	A	B
357	*SWU16735	A	B	B	A	B	A	B	B	A	B	A	A	A	A	A	A	B	A	B	B	A	B	A	B	A	B	B	B	B	B	B	A	B	B	B	A	B	B	A	A	B	A	B	B	A	A	B	B
358	*SWU16856	B	B	B	A	A	B	A	B	B	B	B	B	B	B	A	A	A	B	A	A	A	B	B	A	B	A	B	B	A	A	A	A	B	-	B	A	A	A	B	B	A	B	A	A	B	-	A	B
359	*SWU16858	A	B	A	B	A	A	B	B	A	B	A	A	B	A	A	B	B	A	B	A	B	A	A	B	A	B	A	B	A	A	B	B	A	-	B	B	A	A	A	A	A	A	B	A	B	A	B	B
360	*SWU17197	A	B	B	A	A	B	B	B	A	B	A	B	B	A	A	B	B	A	B	A	B	B	B	A	A	B	B	A	B	A	B	B	A	A	B	A	A	A	A	B	B	B	A	A	B	A	B	A
361	*SWU17434	B	B	B	A	B	A	A	B	-	B	B	B	B	A	A	A	A	A	B	B	A	B	A	B	A	A	A	A	B	B	B	B	A	A	A	B	B	A	A	A	A	A	B	B	B	B	B	B
362	*SWU17789	A	A	B	A	B	B	A	B	B	A	B	B	A	A	A	B	A	B	B	B	B	B	A	A	A	B	B	B	A	A	B	A	A	B	B	B	B	A	A	A	B	A	A	A	B	A	A	A
363	*SWU18223	A	-	A	A	A	A	A	A	A	B	B	B	A	A	B	B	A	B	B	B	A	B	B	A	A	A	B	A	-	A	A	A	B	A	A	-	B	B	A	-	B	B	-	A	-	-	B	-
364	*SWU18366	A	-	A	A	B	A	A	A	A	A	B	A	A	B	A	B	A	A	A	B	A	A	B	B	A	A	A	B	A	A	A	A	B	-	B	A	-	-	B	A	B	A	A	B	B	B	B	B
365	*SWU18579	A	A	A	A	B	A	A	A	A	B	A	B	A	B	A	A	A	A	A	B	A	A	B	B	A	B	A	B	A	A	A	A	B	B	B	A	A	A	A	B	A	B	A	B	B	B	B	B
366	*SWU18617	A	B	-	B	-	-	B	B	B	A	A	A	A	B	A	A	A	A	A	A	B	A	B	A	B	A	A	B	B	B	B	B	B	A	A	A	B	A	A	A	A	A	B	A	A	B	A	A
367	*SWU19676	B	A	A	B	A	B	A	A	B	B	A	A	A	B	A	B	A	A	A	B	B	A	B	A	B	B	A	A	B	B	A	A	B	A	A	B	B	A	B	A	A	B	B	B	B	B	B	A
368	*SWU19895	-	B	B	-	B	B	A	B	A	B	A	-	B	B	B	B	B	-	B	A	B	A	B	A	A	B	A	B	B	B	A	A	A	A	A	A	A	A	B	A	A	A	B	A	B	A	B	B
369	*SWU19932	B	B	B	A	B	B	B	B	A	B	A	B	A	A	A	B	A	B	A	A	A	B	B	A	B	B	B	A	B	A	B	A	B	A	A	B	A	B	B	B	-	A	A	A	B	A	B	B
370	*SWU19993	A	B	B	B	A	B	A	A	A	A	A	B	A	A	A	A	B	A	B	B	A	A	A	B	B	A	A	A	B	A	A	A	A	A	A	B	B	A	A	A	A	A	B	B	B	B	B	B
371	*SWU20012	A	B	B	B	A	B	A	A	A	A	A	B	A	A	A	A	B	A	B	B	A	A	A	B	B	A	A	A	B	A	B	A	A	A	A	B	B	A	A	A	A	A	B	B	B	B	B	B
372	*SWU20027	A	B	B	B	A	A	A	A	A	A	A	B	A	B	A	A	B	A	B	B	A	A	A	B	B	A	A	A	B	A	B	A	A	A	A	B	B	A	A	A	A	A	B	B	B	B	B	B
373	*SWU20501	B	A	A	A	A	B	B	A	B	A	B	B	A	A	B	A	B	B	B	A	B	B	B	B	B	A	B	A	A	B	B	A	B	B	A	A	A	A	B	B	A	A	B	B	B	A	A	B
374	*SWU20658	B	A	A	A	B	B	B	A	A	A	B	B	B	A	B	A	A	A	A	B	A	B	A	B	A	B	B	B	B	A	A	B	B	A	A	A	A	B	A	A	A	A	A	A	B	A	B	A
375	*SWU20757a	A	A	B	A	B	A	B	B	A	A	A	B	A	B	A	B	B	A	B	A	A	B	A	A	B	A	B	B	A	A	B	A	A	A	A	A	B	B	A	B	B	B	B	B	B	A	B	B
376	*SWU20757b	B	B	A	A	B	A	B	B	B	A	B	A	A	B	B	B	A	B	A	B	B	B	A	A	B	B	B	B	A	B	B	A	B	B	A	A	B	B	A	B	B	B	B	B	B	B	A	B
377	*SWU21958	B	A	A	B	B	-	B	B	B	B	B	A	A	A	B	A	A	A	A	A	B	B	B	B	A	B	B	A	A	A	B	B	A	B	B	B	B	B	A	B	A	A	B	B	B	B	B	A
378	*TMB0327	A	B	A	B	A	A	B	B	B	A	B	B	B	A	A	B	B	A	B	A	B	A	A	A	A	B	A	B	A	A	B	B	A	-	B	B	A	A	B	B	B	A	B	A	B	A	B	B
379	*TMB0836	A	A	A	A	A	A	A	A	A	A	A	A	A	A	A	A	A	A	A	A	A	A	A	A	A	A	A	A	A	A	A	A	A	A	A	A	A	A	A	A	A	A	A	A	A	A	A	A
380	*TMB1152	-	-	-	-	-	-	-	-	-	-	-	-	-	-	-	-	-	-	-	-	-	-	-	-	-	-	-	-	-	-	-	-	-	-	-	-	-	-	-	-	-	-	-	-	-	-	-	-
381	*TMB1931	-	-	-	-	-	-	-	-	-	-	-	-	-	-	-	-	-	-	-	-	-	-	-	-	-	-	-	-	-	-	-	-	-	-	-	-	-	-	-	-	-	-	-	-	-	-	-	-
382	*TMB2904	B	A	B	A	A	A	B	B	B	B	A	B	A	A	B	A	A	A	B	B	A	A	B	B	A	A	A	B	B	B	A	B	B	A	B	A	B	A	A	B	A	B	A	B	B	A	B	B
[truncated: 132 more columns]

## Sheet: RILV trait
	E1	E1	E1	E1	E1	E2	E2	E2	E2	E2
Num	t1	t2	t3	t4	t5	t1	t2	t3	t4	t5
1	39.8125	59.1875	95.2812	114.375	122.062	30.375	54.625	94.875	116.25	118.312
2	38.5	58.875	93.3125	114.438	120.812	29.3125	55.75	95.0625	112.75	116.196
3	40.25	59.1875	94.7188	117.438	124.438	32.5	57.75	97	118.5	121.938
4	42.4375	61.5	95.625	123.312	130.875	30.875	57.125	92.8125	110.125	111.58
5	37.375	58.125	94.0625	118.438	125.312	31.125	58	101.375	125.062	124.938
6	38.4911	54.5804	86.1607	106.652	114.054	30.125	51.1875	87.8125	104.625	106.5
7	40.25	54.6875	86.875	108.562	117.875	30.9375	49.875	81.75	106.955	111.688
8	38	56.1875	90.4375	112.125	120	27.25	49.0625	86.0625	109.188	111.125
9	39	57.5625	95.6562	120.5	125.875	29.4375	54.0625	98.0625	120.5	115.375
10	43.6875	61.5625	101.469	124.75	131	30.125	54.25	95.375	123.688	127.562
11	38.8125	59.9375	97.75	114.375	121.938	28.0625	51	90.9196	113.438	112.562
12	37.3125	59.375	100.062	123.688	130.5	30.25	53.6875	93.0625	109.188	107.938
13	38.1875	59	103.031	123.938	127.75	31.125	56.6875	96.0625	115.661	116.708
14	34.25	55.5	95.625	115.312	121.75	28.8125	54.75	89.6042	109.312	108.625
15	33.125	52.0625	94.6562	117.125	127.062	28.75	49.125	88.4375	112.25	115.375
16	38.25	63.1875	105.562	129.759	135.812	29.3125	54.8125	91.9375	112.312	109.25
17	40.8125	59.25	98.875	117.75	124	30.8125	54.375	88.3839	108.562	109.786
18	38.6875	57.375	95.1562	115	121.062	33.75	58.875	101.688	119.812	120.062
19	40	57.125	91.6875	115.125	123.875	31.5625	53.3125	88.8036	111.917	110.438
20	36.625	58.125	90.4688	112.75	121.5	29.25	50.6875	86.5	104.562	105.938
21	36.75	54.5	88.8125	115.062	121.875	27.1875	46.4375	78.8661	96.5625	100.652
22	39.4375	56.375	91.0938	116.375	125.312	27	50	86.9375	106.875	106.125
23	35.2589	55.6429	88.0893	107.384	111.562	23.8125	42.5625	73.25	100.625	92.7589
24	36.5	52.25	86.0938	105.438	112.25	28.9375	44.8125	80.375	102.125	99.5625
25	37.875	57.25	92.375	116.562	129	29.9375	49	88.0625	115.625	113.75
26	37.8125	55.4375	89.6875	110.688	120.188	30.375	52.0625	91.5625	114.979	119.188
27	34.4375	54.625	85.5	107.75	115.438	30.125	50.4375	85.6339	104.375	103.562
28	37.625	55.8125	91.4688	109.812	117.75	29.5	54.625	89.25	111.688	109.723
29	35.3125	50.4375	84.2188	110	117.625	27.3125	50.4375	85.75	114.562	119.938
30	39.375	57	93.375	115.375	122.312	31.125	51.9375	77.3125	111.5	113.312
31	36.75	52.375	86.4375	108.625	118	25.875	45.1875	75.75	96.875	97.9375
32	39.25	56.8125	93.125	112.25	116.875	28.5	48.8125	75.9524	101.42	98.75
33	38.125	55.875	90.6875	112.5	117.5	27.125	46.5	75.375	100.375	99.6875
34	36.3125	54.25	89.7188	115.812	122.812	27	42.25	77.6518	93.9375	95.3958
35	43.875	67	108.625	128.312	133	29.6875	48.875	81.3125	109.938	109
36	38.875	61.625	98.9062	117.688	123.375	26.75	44.3125	79.125	100.786	97.5
37	39.5625	62.8125	101.969	120.938	126.25	28.3125	49.8125	81.125	107.875	109.812
38	36.625	58.1875	96.4062	116.125	124.938	26.625	45.8125	81.25	101.5	97.6875
39	33.75	52.25	94.9062	113.688	119.875	28.5	46.6875	82.4375	108.625	109.25
40	35.375	54	95.625	110.812	117.25	28.6875	48.25	83.625	104.375	107.438
41	41.25	63	102.531	123.312	128.938	30.25	52.1875	80.625	112.438	110.562
42	35	54.6875	91.125	113.438	119.562	27.8125	46.6875	87.4375	107.5	110.375
43	34.9375	56.5625	91.9375	115.25	121.812	28.8125	49.375	86.625	111.938	114.875
44	39.125	59.5625	96.3438	117.25	122.062	28.5	49.9375	82.5	107.688	110.062
45	35.3125	51.5625	83.5625	103.938	107.125	27.8125	47.1875	76.5	97.875	101.795
46	34.25	50.625	78.0625	98.3125	104.5	26.125	46.125	81.3125	95.0625	94.5
47	34.625	51.625	88.375	107.562	112.188	27.25	48.5625	82.9375	100.062	98.125
48	32.625	49.25	84.1964	105.688	111.125	27.625	50.25	82.1875	103.375	104.938
49	37.25	54.4375	86.9062	109.75	116.688	30	52.375	86.7411	111.938	113.188
50	35.1875	52.625	85.0938	107.875	114.375	29.5	50.5625	90.5	107	108.375
51	37.8125	55.0625	89.9062	112.812	118	31.6875	54.375	84.5	108.625	107.562
52	38.25	52.6875	81.4062	102.562	110.188	30.4375	49.75	84.8125	107.75	107
53	35	49.3125	78.75	101.75	111.375	28.1875	46.625	87	105.375	108.062
54	37.625	53.25	83.75	104.938	113.438	30.3125	52.625	89.4375	110.375	112.875
55	36.8125	54.125	88.1875	110.312	118.5	29.4375	53.125	93.0625	119	120.562
56	37.5625	51.1875	82.1875	106.062	112.312	31.5625	52.75	88.5	114.125	117.75
57	39.625	53.0625	83.4375	108.875	116.5	28.9375	50.5625	92.6875	109.938	107.062
58	38	53.4375	84.4375	106.688	112.688	29.1875	52.375	95.5625	114.616	113.188
59	39.5	55	84.0312	106.25	114.125	29.8125	53.125	92.25	120.5	116
60	37.8125	53.875	86.625	104.938	110.375	27.75	53.1875	91	119.646	118.375
61	41.6875	59.375	92.375	116.75	123.634	31.0625	59.625	94.5	122.312	120.125
62	41.0625	60.625	94.3125	114.875	121.688	31.3125	55.875	90.4375	117.188	118.25
63	37.25	56.6875	94.5312	118.812	124.5	28.1875	54	90.9375	120.062	123.688
64	36.0625	54.1875	89.25	111.938	119.25	27.25	51.75	90.7946	114.25	113.438
65	34	52.875	88.625	109.688	116.062	29.3125	56.875	92.3125	109.875	107.5
66	35.625	55.3125	90.375	110.438	118.125	27.375	52.9375	88.6875	112.5	107.75
67	35.8125	55.4375	93.3125	118.688	127.875	28.0625	51.8125	85.5625	117.25	112.812
68	38.625	59.1875	94.5625	116.938	121.75	28.1875	55.6875	95.75	121.625	122.125
69	37.375	56.6875	88.4062	110.75	116.812	31.5	56.1875	90.5625	120.062	117.25
70	35.5625	49	79.625	100.125	108.125	25.6875	47.375	85.3125	108.812	109.125
71	38	58.625	91.7812	111.562	118.812	29.0625	55.5625	91.625	114.312	114.812
72	36.5625	52.0625	82.9375	103.625	110.938	30.3125	55.6875	92.5625	117.062	118.375
73	31.9375	44.625	74.3125	99.5	107.625	24.6875	46.4375	83.8125	104.312	106.812
74	36.25	51.4375	80.5625	103.375	111.312	30.9375	51.6875	80.0268	108.188	110.438
75	34.3125	52.9375	87.25	111.188	118.562	27.1875	50.0625	88.0625	108.458	107.25
76	34.5625	50.875	83.625	107.938	116.188	28.75	49.9375	79.6875	112.625	115.25
77	37.3125	53.25	84.4375	106.125	113.375	30.9375	52.9375	87.375	110.062	106.438
78	33.1875	51.4375	82.5312	106.125	114.688	26.75	49.5	91.1875	101.25	101.062
79	34.375	49.3125	80.875	102.688	110.688	28.125	50.625	82.875	105.75	107.188
80	35.5	50.25	80.25	103.562	112.625	25.9375	45.875	87.375	100.625	95.375
81	35.875	49.25	80.2188	100.938	106.375	29.8125	53.3125	84.1875	113.125	114.5
82	35.25	48.6875	77.3125	103.188	109.312	27.1875	52.75	81.6875	119.625	119.188
83	34.5	48.6875	80.8438	103.062	108.625	29.1875	49.5625	73.7083	104.188	104.75
84	36.25	49.375	82.3125	105.375	108.812	28.125	53.125	85.875	115.812	115.562
85	37.125	54.5625	85.125	107.875	114	30.25	54.125	90.3571	111.688	112.938
86	36.25	54.75	89.75	111.062	117.5	31.9375	56.5	89.125	111.5	111.125
87	37.1875	56.625	94	115.438	122.438	28.5	55.5625	86.5625	115.188	114.125
88	32.0625	48.3125	82.9375	101.875	107.812	25.9375	48.9375	78.0714	104.562	102.938
89	36.5625	53.5625	85.6875	107.312	117.375	29.375	53.125	87.9375	110.125	106.5
90	39.5625	57.5	92.125	110.438	117.438	29.875	53.8125	88.1875	114.938	112.75
91	35.9375	49.1875	79.9062	98.9375	107	27.375	49.75	86.5	101.696	100.312
92	37.375	51.6875	80.5625	98.1875	107.312	30.75	50.6875	92.875	107.062	106.938
93	36.25	52	83.875	103.625	110.188	28.375	53.75	91.375	110.312	108.125
94	35.75	46.75	78.0312	94.8393	100.607	29	53.375	93.1607	113.188	114.188
95	32.75	45.6875	76.1562	100	109.062	28	51.25	87.0625	106.625	105.438
96	31.4375	45.5625	74.6964	94.7054	101.812	28.1875	52.1875	90.75	110.562	108.312
97	31.125	43.8125	72.8542	95.5208	103.312	29.1875	50.375	82.5625	101.125	103.875
98	35.625	50.0625	79.75	101.5	109.562	27.5625	53.8125	84.75	111.375	112.5
99	34.0625	49.1875	79.9375	103.625	109.938	28.3125	54.0625	86.875	107.688	105.75
100	40.75	55.9375	84.2812	108.062	114.375	34.125	57.6875	94.0625	116.25	115.25
101	42.25	58.4375	86.8125	108.062	112.938	30.0625	53.3125	90.125	109.062	108.688
102	32.75	46.75	77.75	96	102.125	28.8125	49.75	87	102.438	104.688
103	38	56	90.7188	111.938	117.062	30.4375	55.0625	92.8125	113.5	111.812
104	32.1875	46	77.8438	102	108.938	28.0625	48.875	89.1875	113.875	115.062
105	36.5625	54.1875	87.6875	106.875	110.812	28.75	53.5625	88.0625	104.938	106.188
106	37.6875	53.1875	86.75	107.75	114.625	27.875	50.125	88.125	107.375	111.25
107	37.1875	52.125	85.0625	104.062	111.188	28.1875	54.1875	91.2083	107.875	105.312
108	37.5625	55.9375	90.5625	111.562	117.062	27.9375	52.375	88.625	117.125	119.125
109	38.3125	56.625	92.3125	112.875	119.375	30.25	52.375	84.375	111.438	109.688
110
111	37.1875	56.9375	94.9375	118.312	123.875	27.8125	50.5	86.9375	111.625	107.438
112	36.875	55.4375	92.4062	112.5	118.188	28	50.625	86.5	101.812	98.4375
113	33.9375	53.125	93.25	111.688	116.438	26.375	50.3125	82.125	109.438	106.875
114	32.6875	55.875	98.6562	121.875	126.875	28.5	58.4375	96.6875	123.312	123.25
115	30.125	50	86.6875	111.312	121.75	25.375	49.125	86.875	111.688	113.688
116	29.4375	45.375	83.625	107.125	115.625	26	48.875	87.25	111.771	110
117	30.375	46.125	80.3438	102.25	109.062	26.125	46.625	73.875	100.5	103
118	39.25	55.5625	88.1875	108.75	116.438	29.5	54.25	95.0625	116.562	118.125
119	38.75	54.125	87.5625	106.438	114.375	32.9375	53.125	89.6875	113.312	114.562
120	41	55.875	86.875	109.125	117.125	32.5	52.1875	87.75	109.688	112.438
121	35.1875	49.75	80.0625	101.812	107	28.1875	49.75	88.25	96.6875	96.125
122	35.5	54.5	91.0625	111.75	114.812	29.6875	54.375	90.9375	124.062	124.562
123	35.875	52.1875	84.6875	109	116.062	30.5625	51.8125	89.0357	116.25	118.5
124	33.5	49.25	81.3438	102.938	112	27.4375	47.5	83.3125	106.312	108
125	35.625	59.3125	98.3125	121.125	126	28.375	53.5625	83.375	117.688	119.438
126	34.9375	50.0625	84.0625	106.875	114.375	29.875	50.6875	90.5625	112.696	109
127	38.75	54.75	88.4375	108.688	113.625	32.8125	52.6875	86.7679	111.009	105.938
128	37.0625	56.6875	91.9375	112.812	118.75	31.4375	49.5625	88.1875	109.375	114.25
129	28.9375	43.875	71.5625	89.6042	93.1667	27.875	48	89.2083	97.3304	95.375
130	35.875	53.125	86.5	108.812	113.562	30.125	55.125	86.4911	108.875	105.188
131	31.125	47.5625	80.2188	103.188	109.875	30.3125	49.8125	88	108.812	108.562
132	35.625	52.4375	84.4062	103.438	108.812	30.75	53.625	84.25	107.062	110.188
133	38.75	58.375	94.625	118.438	125.5	34.1875	56.5625	99.8125	127.25	125.75
134	35.5625	50.625	82.4375	101.812	105.375	30.3125	53.5625	89.8333	115.75	115.438
135	38.875	59.3125	97.2188	113.938	121	30.875	57.3125	94.5982	119.125	119.875
136	35.625	52.375	86.5	104	106.304	32.8125	54.8125	92.375	115.812	112.125
137	34.6875	52.1875	87.125	107.25	110.062	30.8125	53.4375	90.1875	111.875	113.75
138	36.9375	53.8125	85.2812	106.312	114	32.5625	53.5625	91.5714	114.188	113.205
139	32.625	49.5	81.75	100.938	105.625	31.6875	52.75	87.0536	105.75	105.562
140	32.4375	47.6875	76.8438	97	102.938	31.4375	51.5625	82.2321	99.2232	100
141	32.625	49.5	81.6875	98.8125	104.562	31.875	54.6875	88.625	112.438	114.062
142	34.5	50.8125	81.6875	98.4375	103.688	35	58.25	92.4375	115.375	117.375
143	35.6875	51.3125	81.875	101.062	106.688	29.9375	51.9375	90.0625	107.125	106.938
144	31.4375	47.75	79.5625	102.5	111.125	29.4375	50.8125	87.875	114.688	118.125
145	32.4375	49.5625	78.25	99.4375	108.5	29.0625	51.5625	89.2857	111.688	112.125
146	32.6875	49	79.125	101.938	109.312	29.875	49.9375	90.1964	114.188	111.75
147	35.625	52.8125	83.2812	105.312	111.562	31.75	54.3125	90.75	114.312	114.25
148	34.4375	52.625	82.625	105.438	112	30.5	54.1875	88.8125	112.125	113.125
149	31.3125	48.5625	77.875	98.3125	105.938	30.875	51.875	84.875	105.188	106.875
150	30	49.0268	81.7768	102.045	106.089	32.5	56.375	93.1786	111.938	110.062
151	34.0625	52.6875	90.4375	111.938	117.312	28.9375	53.5	95.9375	119.188	120.5
152	36.0625	56.25	87.875	108.062	113.75	33.6875	59	96.375	118.812	117.688
153	33.9375	49.9375	82.9375	105.125	112.25	32.0625	52.5625	89.875	112.562	114.312
154	35.75	51.5625	84.6875	101.875	108.75	30.1875	51.625	89.5	109.625	113.688
155	35.5	53.875	88.8125	104.688	110	32.9375	57.5	97.8125	119.688	121.812
156	32.5625	50.4375	85.4375	103.125	107.625	34.75	61	100.771	121.188	122.125
157	34.25	50.9375	88.4688	112	117.75	30.625	54.3125	94	117.812	121.125
158	38.375	52.875	81.125	108.125	117.25	35.6875	57.4375	93.75	119.312	116.25
159	36.125	50.4375	83.1875	103.375	106.562	32.25	53.25	94.9375	116.125	118.062
160	38.25	53.6875	85.5625	106.688	112.5	33.0625	54	92.5625	109.312	110.312
161	36.625	53.75	83.0625	105.25	112.875	30.75	53.8125	95.375	119.125	123.375
162	36.6875	53	84.5625	106.562	112.375	34.25	57.6875	96.75	120.938	123.5
163	33.6875	50.625	78.2812	93.25	97.9375	30.8125	52.6875	81.625	98.25	98.3542
164	32.875	48.6875	81.6875	100.938	107.688	31.625	55.625	94.2589	117.062	116.438
165	28.875	42.5	71.3542	90.625	97.8125	29.9375	52.0625	87.8125	110.188	114.75
166	31.0625	46.5	79.3571	99.25	104.417	31.3125	54.8125	93.9375	122	124.562
167	31.4375	47.125	79.4375	98.25	104.125	33	56.125	93.75	112	110.688
168	35.8125	54.625	89.125	109.625	113.812	32.25	58.5625	95.625	116.562	114.438
169	34	49	78.8125	97.5625	102.438	31.125	55.8125	89.9375	107.125	104.438
170	32.25	49.9375	83.5	103.312	106.812	28	52.75	92	111.375	112.375
171	34.5625	52.25	83.4062	103.875	106.688	29.5	53.9375	94.0625	115.938	118.688
172	33.625	48.875	77.875	95.3125	101.438	30.9375	54.0625	90.875	111.188	113.5
173	28.8125	42.625	73.0268	93.1518	99.625	31.6875	49.9375	84.25	103.875	105.134
174	33.1875	51.1875	84.125	105	113.312	29.6875	50.4375	84.875	109.75	112.875
175	33.4375	51.875	84.375	105	109.938	32	52.625	90.375	107.938	110.188
176	34.3125	51.625	86.0625	105.062	110.938	31.75	53.5	89.3125	106.188	108.205
177	34.875	52.3125	87.8125	105.062	110.75	35.6875	60	97.4643	117.562	118.562
178	32.7679	50.3214	81.6964	101.161	106.205	33	54.625	87.5625	108.312	107.571
179	32.0625	49.6875	85.6875	103.812	108.438	29.3125	50.0625	86.625	108.688	111.562
180	34.125	51.5625	89.875	110.75	116.688	31.6875	54.375	88.9375	111.062	115.25

## Sheet: BCV trait
	E1	E1	E1	E1	E1	E2	E2	E2	E2	E2
Num	t1	t2	t3	t4	t5	t1	t2	t3	t4	t5
1	40.5625	67.875	104.688	122.25	132.812	29.8125	53.4375	92.125	116.312	119.812
2	42.0625	68.375	101	115.875	129	34.1875	60.75	101.812	123.25	126.312
3	35.9375	61.875	96.5	117.438	129.938	32.75	57.75	96.1161	119.688	124.875
4	39.625	65.3125	95.4375	116.812	131.375	32.4062	53.4375	89.875	113.75	116.438
5	37.0625	64.625	97.6875	118.312	129.938	30.9688	59.375	101.688	125.875	128.875
6	35.125	56.625	86.375	109.5	120.25	29.75	53.9375	90.9375	114.75	118.312
7
8	34	58.1875	92.5	115.938	124.938	29.4375	53.1875	92.875	118.375	121.438
9	32.0625	55.9375	92.625	115.938	128.125	30.9375	55.6875	97.8125	121.188	126.125
10	35.125	59.3125	91.25	112.875	121.812	30.75	56.8125	96.375	124.5	127.75
11	35.25	61.5	93.1875	113.562	127.312	26.375	47.9375	86.4375	110.688	112.875
12	36.5	61.625	93.3125	115.938	129.625	31.2188	56.0625	95.8125	120.688	123
13	39.625	66.25	98.1875	119.438	130.688	31.5938	59.9375	100.688	124.75	134.875
14	39.4375	64.8125	96.6875	117.125	125.75	32.3438	54.5	92.4375	116.312	121.625
15	35.375	60.6875	95.125	121.938	131.875	32.2812	52.5	89.375	114.375	118.438
16	37.4375	64.125	99.1875	118.188	132.312	30.2812	52.4375	93.2054	117.562	120.875
17	40.875	65.25	98.8125	119.625	133	32.0625	54.6875	93.5625	114.625	117
18	39.8125	67.625	99.4375	115.125	127.5	31.625	57.4375	92.0625	120.188	122.375
19	37.8125	62.125	93.25	113.625	126.125	31.9375	55.8125	97.375	125.875	128.625
20	34.6875	58.125	92.25	115.812	125	29.9375	55.0625	94.8125	120.312	119.5
21	37.375	60.3125	94.1875	116.438	130.062	32.5938	56.4375	95.5625	125.938	128.938
22	35.8125	57.8125	88.125	107	119.25	31.3562	57.625	99.75	124.25	125.062
23	34.125	59.4375	87.5	105.938	115	28.4688	54	92.1875	114.25	113.188
24	36.9375	59.6875	90.1875	111.25	122.062	31.6875	57.3125	98.375	121.5	121.875
25	37.125	61.25	93.75	116.5	128.938	31.9688	55.125	93.125	121.125	121.375
26	38.875	63.125	96.6875	119.125	129.312	32.1875	55.6875	97.0625	120.5	119.438
27	37.9375	59.75	87.875	106.688	115.938	31.5938	55.625	93.8125	115.938	119.5
28	37.375	62.375	93.75	111.875	122.875	32.5938	54.875	94.0625	116.75	119.188
29	35.5625	60.6875	95.625	113.75	129.125	31.2188	53.6875	93.1875	113.5	117.438
30	37.625	61.8125	93.375	113.5	128.938	33.475	52.125	89.0625	113.75	115.562
31	38.875	61.8125	89.0625	108.938	121.875	31.0312	51.5	86.1875	110.625	114.5
32	39.6875	62.625	91	107.438	118.062	32.1562	54.8125	90.0625	112.812	113.098
33	39.5625	64.75	98.8125	117.062	125.75	32.2188	55.375	95.9375	116.562	118.312
34	36.3125	60.1875	99.0625	121.562	130.5	33.6875	56.0625	94.0625	120.5	123.188
35	35.6875	60.5625	94.75	111.5	124.875	34.6562	59.375	96.25	120.188	116.5
36	34.25	58.3125	88	106.875	118	33.1562	56.0625	95.875	119.884	122.875
37	34.5625	58.0625	87.625	108.562	121.438	30.25	56	93.4375	116.125	118.25
38	36.125	59.75	87.8125	107.25	116.688	31.6875	55.9375	95	117.312	119.312
39	36.25	58.625	90.125	110.75	119.25	32.625	56.125	98.1875	122.688	126
40	36.625	59.1875	90.1562	112.5	122.125	29.5625	54.3125	95.8125	120.438	122.438
41	38.8125	63.25	94.875	116.438	127.812	30.3125	53.5	94.1875	122.312	126.5
42	37.1875	61.6875	95.5625	116	129.75	30.9688	56	93.5625	119.25	120.938
43	35.8125	61.3125	92.125	112.375	124.438	32.75	58.3125	96.625	122.562	120.375
44	38.4375	66.5	95.5	113.875	125.125	32.1562	57.5	97.25	122.938	121.5
45	39.75	63.5625	92.875	112.125	122.438	30.9062	52.8125	89.75	112.812	111.58
46	37.375	58	85.5312	106	114.375	31.3438	54.25	94.8125	116.625	118.812
47	33.3125	55.625	88.25	108.312	115	29.4375	51.375	87.3125	108	111.562
48	31.5625	53.0625	83.1875	103.562	112.688	29.875	53.5625	91.875	114.438	116.188
49	36.5625	60.6875	88.5	107.25	117.375	31.5	54	90.0625	116.375	120.875
50	35.5625	58.375	87.625	109.938	121.5	32.4375	54.625	90.4375	113.938	113.062
51	35.75	57.6875	85.6875	108.25	119.875	31.4375	55.5	95.625	122.125	122.5
52	38.1875	61.75	90.5	111.75	122.375	32.0625	55.5	92.0625	116.875	120.625
53	36.75	58.4375	85.4375	105.375	115.812	28.25	53.75	91.9375	118.438	119.812
54	37.9375	62.6875	91.4375	110.938	120.438	32	58.125	93.5625	120.438	124.375
55	34.75	58.125	91.375	114.438	128.125	31.0625	57.5	101.5	125.375	132.875
56	40.0625	64.75	91.4688	110.375	122.562	32.5938	56.5625	95.5	120.875	124.75
57	36.625	60	88.375	106.25	118.312	34.0625	56.125	93.0625	120.562	123
58	37.5	60.6875	88.4688	112.062	122	33.125	53.75	91.125	118.062	119.875
59	39.875	61.6875	91.375	110.125	119.625	31.6562	55.0625	94.9375	120.25	122.5
60	37.5625	60.625	91.0625	108.312	117.25	32.3125	54.8125	92.75	117.062	122.562
61	37.1875	61.25	91.0938	110.438	121.75	33.1875	50.375	86.625	113.25	113.75
62	40.75	65.3125	94.4062	115.562	125.875	32.0938	52.0625	90.375	114.438	116.125
63	37.625	61.8125	93.5938	116.688	129.062	30.4375	52.8125	91.5625	117.688	118
64	36.4375	60.375	90.9688	110.125	119.125	32.0938	53.125	88.9375	112.438	113.125
65	36.875	63	93.5625	113.688	123.5	29.8125	50.625	84.375	109.75	113.062
66	39.6875	63.375	93.3125	118.375	128.875	32.5625	56.0625	94.5625	121.375	123.188
67
68	38	64	94.4375	114.062	125	31.3125	55.0625	92.25	120.25	122.688
69	40.125	67.5	98.5625	114.312	124.062	33.5	55.75	96.0625	122.938	125.312
70	35.375	58.875	80.8438	103.438	117.562	26.6875	49.0625	89	113.688	116.312
71	37.5625	61.375	89.9375	105.688	115.188	31.9375	58.0625	95.875	119.312	122.312
72	38.6875	61.6875	89.375	113.688	121.17	29.5625	54.625	94.9375	118.375	118.812
73	31.9375	50.9375	81.9375	106.062	117.5	27.6875	51.1875	91.125	114.562	116.875
74	35.375	56.8125	85.4688	108.062	118.125	31.625	53.5625	90.1875	115.188	118.188
75	36.625	60.4375	90.5625	108.875	117.625
76	36.0625	59.5	89.6875	109.188	120.562	31.3125	54.5	95.0625	121.375	121.375
77	34.4375	55.875	82.75	102.688	111.688	33.125	57.25	93.5179	114.938	117.188
78	34.6875	58.9375	88.8125	109.938	120.188
79	33.5	56.3125	83.75	102.562	113.125	27.0312	50.4375	91.125	117.062	118.5
80	36.125	61.1875	92	112	120.562	28.75	51.5625	90.9375	118.812	122.125
81	35.1875	59.25	91.0625	109.5	120.438	31.375	53.125	91.7143	115	118.812
82	37.5	62.25	93.5625	113.375	122.875	32.625	57.625	95.875	122.5	123.812
83	36.1875	59.9375	84.4375	104.5	116	32.3125	57.125	93.875	119.312	121.188
84	37.5	61.625	90.375	108.312	116.312	32.25	57.4375	98.3125	123.438	126.438
85	37.375	59.6875	89.75	109.5	119.375	33.25	55	94.2768	117.062	120.25
86	33.125	55.75	86.3125	108.125	118.25	34.1875	55.1875	93.3125	117.348	119.759
87	33	54.625	84.5625	105.75	114.875	33.3125	55.6875	92.5625	120.062	119.75
88	29.8125	52.8125	81.3125	101.812	108	27.625	50.4375	88.1875	111.562	115.134
89	35.3125	58.625	87.0312	114.625	125.688	33.3125	52.3125	88.1875	110.188	113.5
90	34.375	58.875	88.25	109.438	121.875	33.125	54.75	95.625	121.25	123.375
91	33.25	56.625	83.4375	101.188	110.375
92	36.4375	59.625	89.875	109.875	116.938	32.7812	52.375	87.5625	114.071	115.75
93	35.5	59	91.125	113.375	126.75	29.4375	50.4375	87.6875	112.438	116.812
94	35.1875	58.6875	86.9375	103.125	109	33.1562	57.8125	101.188	126.188	130.125
95	34.125	57.375	87.9688	106.875	114.062	31.75	57.5	94.3125	113.312	117.375
96	36.0625	58.375	89.6562	113.125	123.438	34.0312	54.5	91.625	115.875	118.125
97	32.6875	54.875	88.4062	110.5	119.812	31.0312	56.75	94.8125	117.062	118.438
98	32.5625	55	85.5938	106.75	116.875	29.625	51.625	88.5	112.375	116
99	31.125	53.8125	82.6875	102	109.688	30.6875	51.3125	88.9375	116.062	121.196
100	37.6875	60.125	88.375	108.938	117.625	35	56.875	96.3125	123.812	127.75
101	35.5	57	84.5312	101	110.625	34.6875	57.5625	94.6875	121.812	125.875
102	37	58.75	85.7188	106.5	113.688
103	36.3125	59.25	89	108.562	116.125	34.4375	58.1875	100.375	127.062	130.75
104	36.5625	62.0625	93.5625	109.938	119.625	34.0625	57.875	98.375	126.375	128.375
105	33.5625	57.625	88.6875	111.125	123.25	31.6562	55.3125	94.4375	115.875	118.438
106	35.6875	57.6875	88.6875	110.625	121.062	34.5625	56.8125	94.125	118.938	120.688
107	35.1875	59.125	86.375	104.438	112.125	33.9375	58.1875	97.9464	119.188	121.25
108	38	62.875	93.8125	110.125	119.188	31.8438	56	96.75	129.375	130.875
109	34.5625	56.5625	86	106.5	115.562	32.4062	54.5	90.8125	118.5	118
110
111	35.4375	58.5625	92.9375	118.688	126.875	33.5312	57.1875	95.5	121.375	127.562
112	35.625	57.5625	87.3438	107.25	114.062	33.5	55	94.9375	123.25	123.5
113	32.6875	57.875	88.1875	107.25	116.375	32.625	54.5625	93.5417	124.688	118.938
114	35.1875	61.6875	97	119.25	128.875	33.1562	60.125	99.9375	123.125	121.688
115	33.625	56.3125	86.375	112.5	126.625	31.4375	57	95.3125	125.5	126.625
116	33.875	56.5	88.1875	110.062	120.688	31.4375	54.3125	93	120	121.625
117	33.625	56.3125	83.1964	105.375	114.125	30.625	55.0625	92.0625	115.188	117.312
118	36.25	56.9375	84.125	104.562	114.375	30.375	53.125	89.25	115.688	114.875
119	36.4375	58.8125	89.3438	108.375	119.5	29.5	51.1875	86.3125	111.188	112.598
120	37.625	58.3661	81.3571	100.75	111.125	29.0938	54.5	88.5	107.875	108.75
121	33.4375	52.5	77.5	96.5625	104.125	29.9375	52.375	88.625	112.312	112.5
122	36.4375	59.75	90.4688	117.75	126.188	28.0625	54.75	95	123.375	123.5
123	36.0625	57.3125	89.3125	113	126.438	31.7188	55	92.9375	119.938	122.562
124	32.5625	52.375	82.375	109.062	119.438	31.4375	56.25	91.8125	120.375	118.062
125	34.3125	60.1875	92.3125	112.938	121.312	30.6875	61.3125	101.938	126.25	125.75
126	36.6875	60.5625	89.875	106.5	115.125	32.8125	61	97.8125	122.375	122.562
127	40.375	63.25	94.5625	112.375	123.062	35.375	62.8125	98.5	125.125	122.688
128	35.75	60.5	91.6875	109.812	121.75	31.8125	61.375	94.8125	115.75	116.75
129	36.75	58.1875	86.4375	105.062	114	32.1875	57.875	94.375	117.25	120.375
130	34.0625	56.3125	87.7812	113.25	122.312	34.1875	59.4375	98.25	126.625	126.562
131	33.9375	56.875	87.5625	108.938	118.625	30.375	53.3125	90.0625	115.625	116.188
132	36.0625	60.25	90.125	112.625	125	33.5	58.5625	95.6696	123.062	124.812
133	38.125	60.875	88.9062	109.938	120.812	33.5625	58.875	100.625	129.5	130.75
134	34.125	57.6875	90.75	111	119.188	28.8125	54.1875	91.4375	114.938	113.312
135	36.9375	60.5625	92.7188	116.188	125.562	31.8438	56.6875	97.875	123.625	120.562
136	34.9375	57.25	88.625	111	122.938	32.2812	53.1875	89.75	115.688	116.312
137	32.125	53.375	85.7812	108.938	119	29.6875	56.5	96.1875	116	116.188
138	37.3125	61.375	92.2812	111.688	120.938	34.5625	60.9375	101.438	123.625	123.812
139	35.0625	57.5625	84.1875	99.625	108.062	32.7812	56.75	94	118.5	119.875
140	35.25	58.625	85.75	106.438	116.875	33.0312	58.3125	96.8125	117.062	115.812
141	34	56.8125	88.875	108.188	117.188	30.7188	58.6875	98.875	119.375	119.438
142	37.5625	59.8125	89.6875	110.062	118.125	33.875	59.5	99.4375	122.25	125.75
143	34.375	56.375	87.25	105.812	115.375	31.8125	57.75	98.25	121.125	122.625
144	35.4375	55.75	90.4375	111	124.312	32	53.4375	96.0625	120.688	120.125
145	38	61.75	93.6875	114.875	125.562	32.5	55.75	95.125	121.375	123.875
146	36.0625	57.75	88.4688	108.062	119.438	34.1875	55.125	91	114.5	117.188
147	36.625	60.5625	90.1562	107.938	116.562	32.25	55.125	91.4375	113.062	110.188
148	34.875	54.8125	84.5625	111.062	120.375	28.9375	50.625	83.1875	106.446	106.75
149	34.8125	54.6875	83.5	105.562	114.312	30.125	52.0625	87.625	111	114.438
150	34.5	57.75	89.875	109.938	119.812	33.3125	56.0625	94.6875	120.188	122.188
151	34.3125	57.0625	90.5625	113.375	122	30.6875	54.3125	91.25	119.625	120.5
152	35.3125	59.3125	90.9375	106.188	115.125	35.375	59.125	99.4375	124.312	122.562
153	33.125	55.5625	85.2188	105.562	115.562	32.3438	54.5	94.6875	118.75	120.625
154	35.6875	58.4375	91.6875	112.312	120.312	32.5625	55.6875	93.625	115.875	110.5
155	38.3125	61.5	92.0938	108.688	117.062	31.0625	52.8125	92.5	118.312	122.375
156	34.875	56.4375	89.875	111.188	122.438	33	58.9375	97.75	122.938	122.938
157	34.9375	58.8125	93.8438	115.375	126.125
158	35.8125	56.1875	85.6875	111.125	125.625	33.1875	56.3125	95.5	123.25	124.125
159	37.25	61.4375	95.5625	118.062	129.75	34.1875	58.125	99	125.875	124.75
160	39.875	63.3125	95.25	113.562	122.438	34.3125	56.25	97.0625	119	118.938
161	37.25	58.875	89.9375	116.438	131.625	31.875	54.375	91.125	120	121.562
162	35	59.625	96.0938	117.375	128.5	33.0938	56.0625	97.125	122.188	122.375
163	32.75	53.0625	83	103.75	112.812	32.4688	56.25	94.625	117.375	118.312
164	34.5625	58.9375	94.125	113.875	126.5	30.5312	55.375	97.4375	125.125	125.25
165	34.25	57.1875	87.5	108.938	119.562	30.6875	53	90.75	117	116.188
166	35.5625	58.6875	92.5	108.688	123.062	31.875	56.75	95	123.75	126.062
167	32.9375	56.4375	91.9375	115.062	124.625	32.9062	55.125	92.0625	118.25	119.5
168	32.3125	54.75	92.5	113.938	123.5	32.8125	61.5625	102.75	125.375	125.312
169	33.3125	53.875	86.0625	111.312	120.625	30.5625	56.875	95.3125	116.75	111.125
170	34.75	54.625	91.625	111.812	121.062	30.125	55.625	94.625	119.875	119.125
171	35.0625	56.625	89.2812	111.875	122.875	30.4375	56.8125	97.1875	123.562	120.241
172	31.5625	52.5	84.5312	103	113.438	28.6562	51.5	88.9375	109.688	110.438
173	35.5625	56.4375	88.5625	111.312	120.188	30.8438	54.875	93.6875	119.062	118.938
174	35.125	57.0625	86.5	108.438	118.812	29.4062	54.8125	96	122.312	121.562
175	37.875	59.9375	90.375	111.438	122.875	32.1875	59.3125	97.8125	125.5	122.312
176	35.3125	56.4375	85.9062	107.438	115.812	32.1875	59.1875	97.3125	122.75	113.938
177	38.9375	62.125	96.0625	114.812	124.125	37.375	62.75	104.125	121.438	120.125
178	37.5	59.8125	93.8125	114	122.625	34.1562	64.8125	100.875	123.375	125
179	34.4375	56.1875	88.0625	106.938	115.562	30.75	60.8125	103.062	128.125	132.938
180	35.8125	57	88.0938	111.812	120.125	30.4375	59.75	97.5625	117.875	119.312
